# Supplementary material for: Design, synthesis and biological evaluation of 6-aryl-1,6-dihydro-1,3,5-triazine-2,4-diamines as antiplasmodial antifolates
Source: Royal Society of Chemistry journal article supplement (doi:10.1039/c6ob01350c), 2016-01-01

NMR spectra were run on either a Varian 200 MHz Gemini 2000 instrument, or on a 400 MHz Varian INOVA instrument. Chemical shifts ( $\delta$  scale) are reported in parts per million (ppm) relative to the central peak of methanol, 49.00 ppm for  $^{13}\text{C}$  and 3.31 ppm for  $^1\text{H}$ ; chloroform, 77.16 ppm for  $^{13}\text{C}$  and 7.26 ppm for  $^1\text{H}$ . Spectra are reported in the following order: multiplicity, approximate coupling constant (J value) in hertz (Hz), number of protons or carbons; signals were characterized as s (singlet), d (doublet), dd (doublet of doublets), ddd (doublet of doublets of doublets), t (triplet), dt (doublet of triplets), q (quartet), p (pentet), br s (broad signal) and m (multiplet). High resolution mass spectra were generated on a Waters SYNAPT G1 HDMS mass spectrometer operated in electrospray mode. Leucine enkephalin (50 pg/ml) was used as reference calibrant to obtain typical mass accuracies between 1 and 3 mDa. The mass spectrometer was operated in positive mode with a capillary voltage of 2 kV, the sampling cone at 30 V and the extraction cone at 4 V. The source temperature was 120 C and the desolvation temperature was set at 350 °C. Nitrogen gas was used as the nebulisation gas at a flow rate of 450 L/h. Purity of final compounds was determined by UPLC, using a Waters Acquity UPLC coupled in tandem to an UPDA detector (200-500 nm). All chemicals for UPLC-MS work were of ultra-pure LC MS grade and purchased from Fluka (Steinheim, Germany) while ultra-grade solvents were purchased from Honeywell (Burdick & Jackson, Muskegon, USA). The analytical column used was a Waters Acquity HSS C18, 150 x 2.1 mm (1.7 mm) equilibrated at 45 °C in a column heater. The mobile phase consisted of acetonitrile and ultra-pure water containing 0.1% formic acid (v/v). A linear gradient was used to ramp the mobile phase composition from 95% water to 10% water in 6 min. The runtime was 10 min per sample. The software used to control the hyphenated system and do all data manipulation was MassLynx 4.1 (SCN 704).

5a

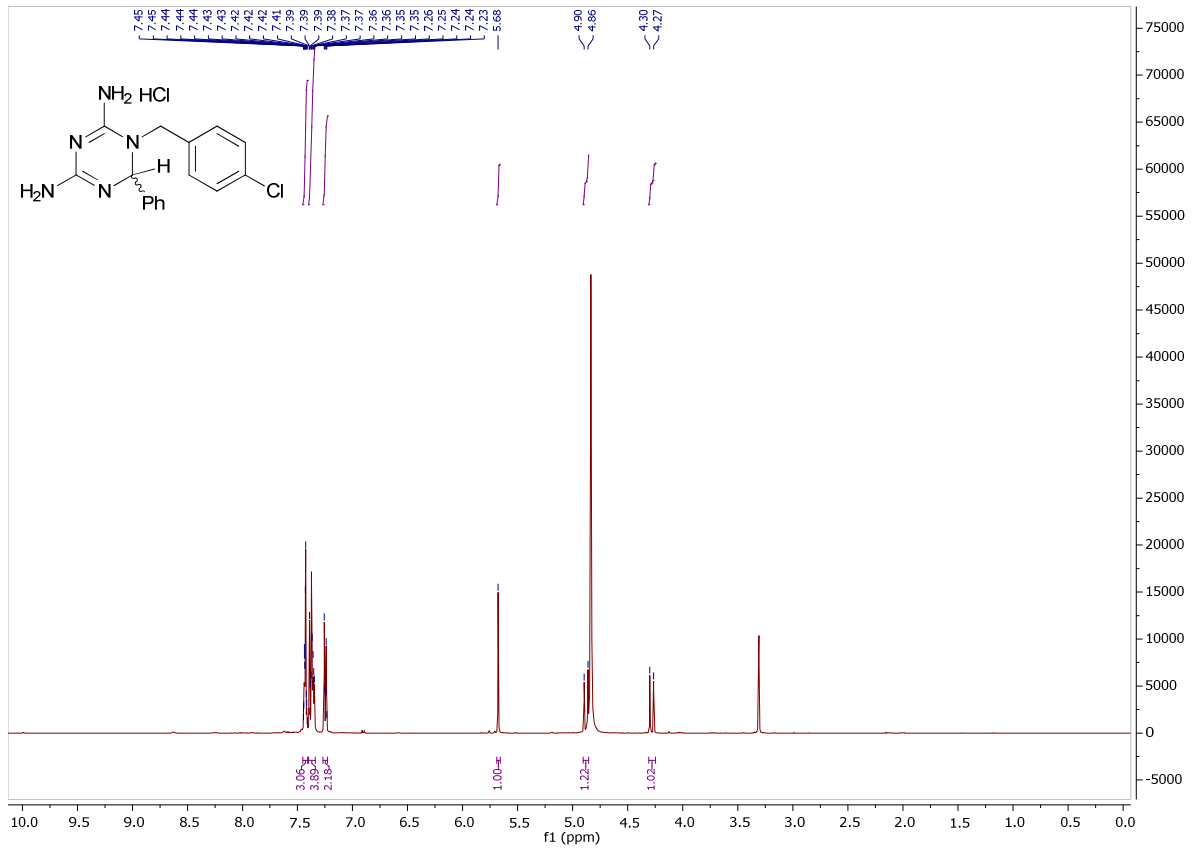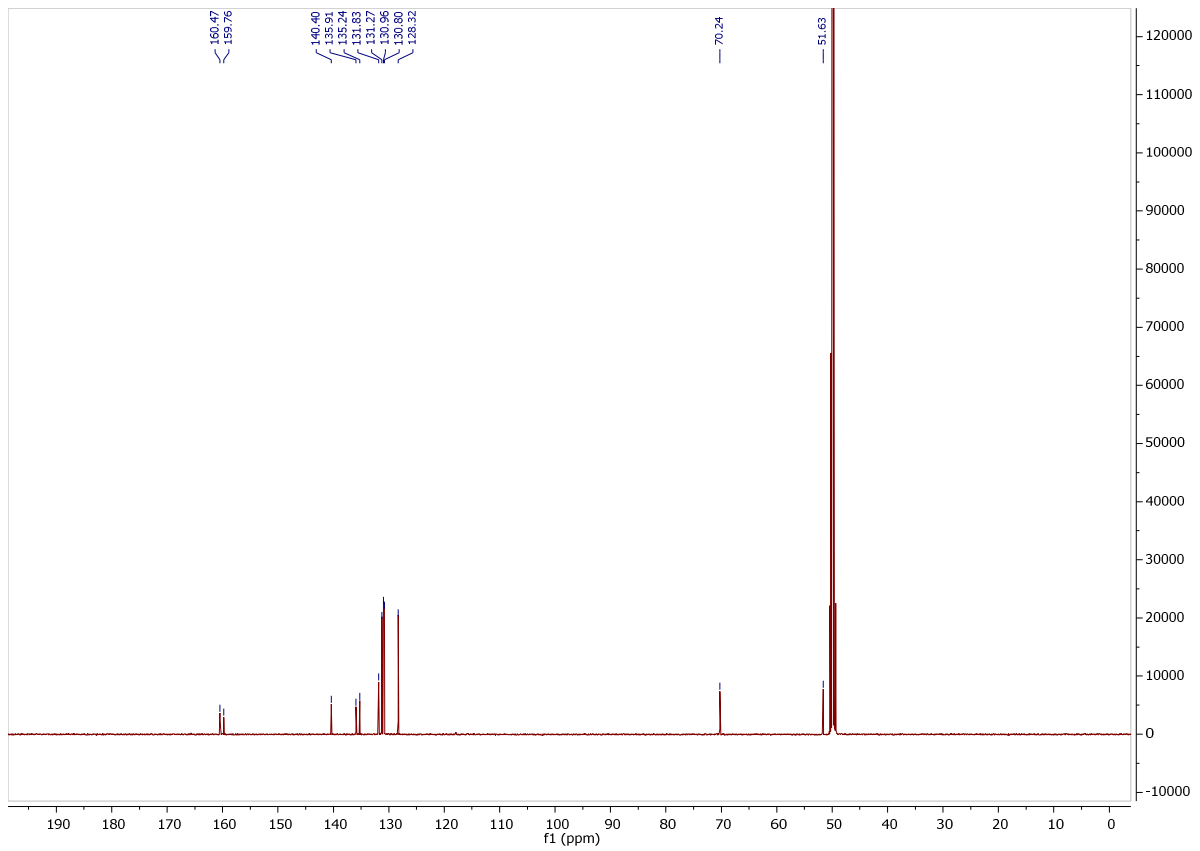

5b

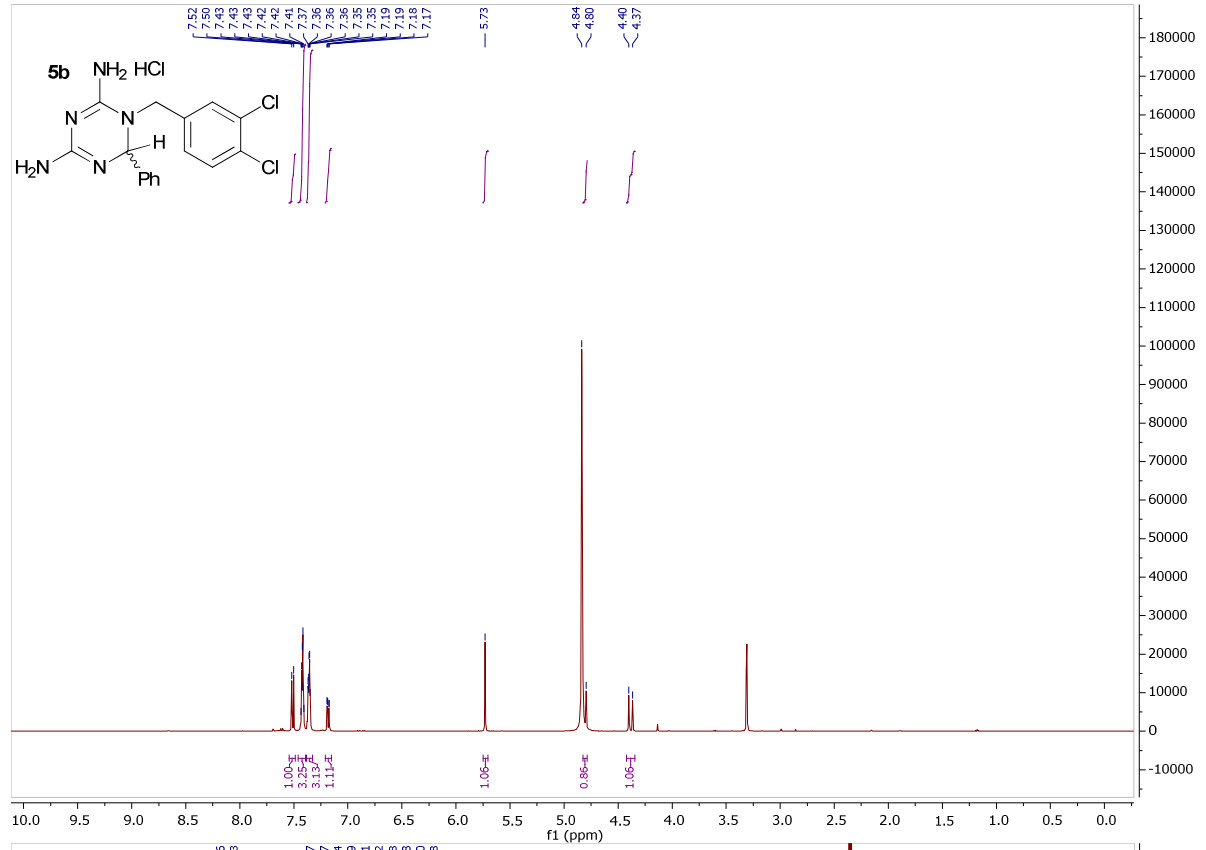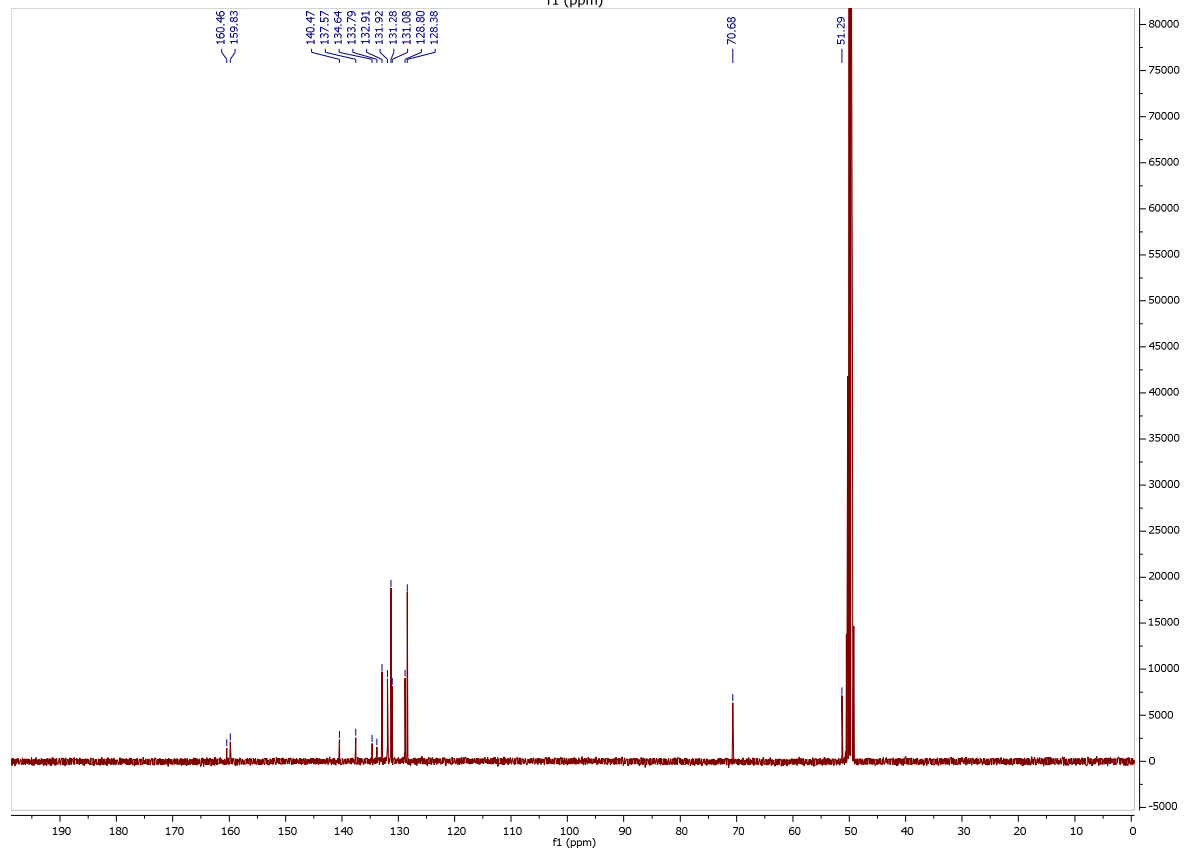

5c

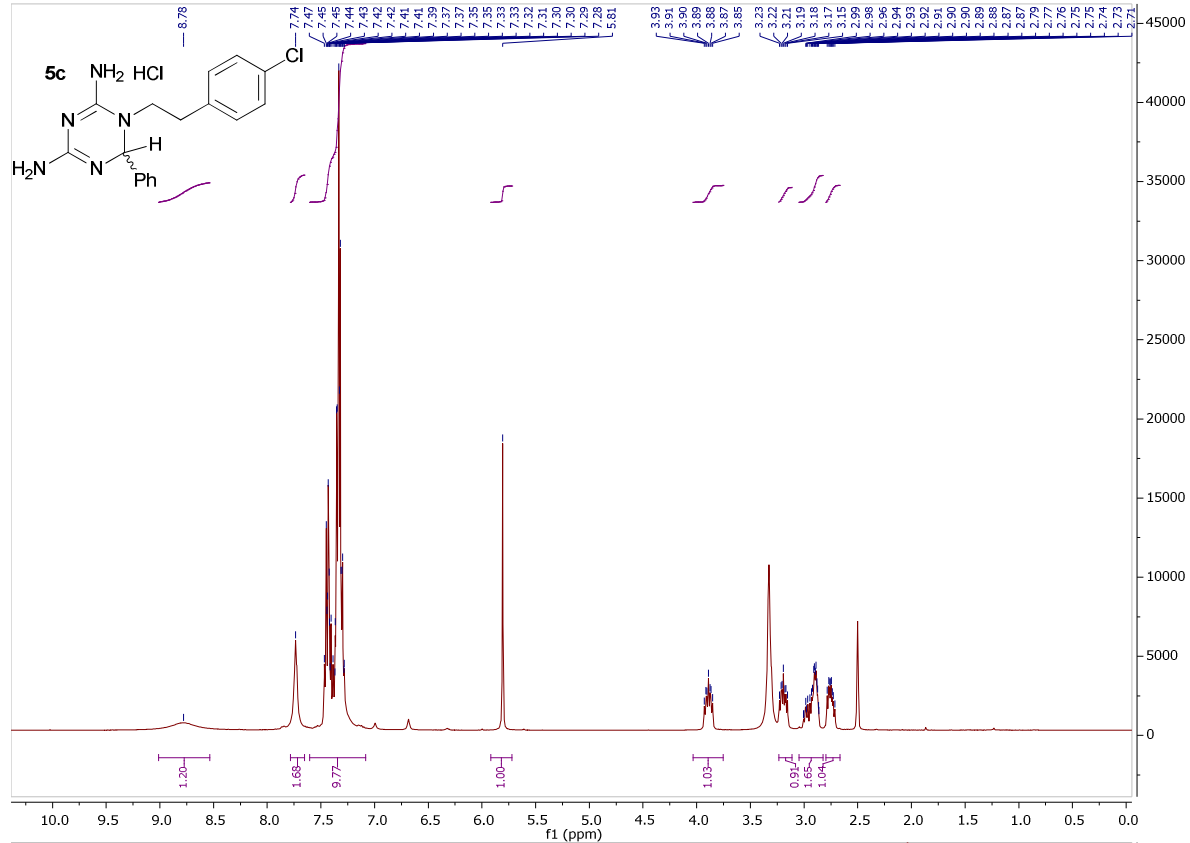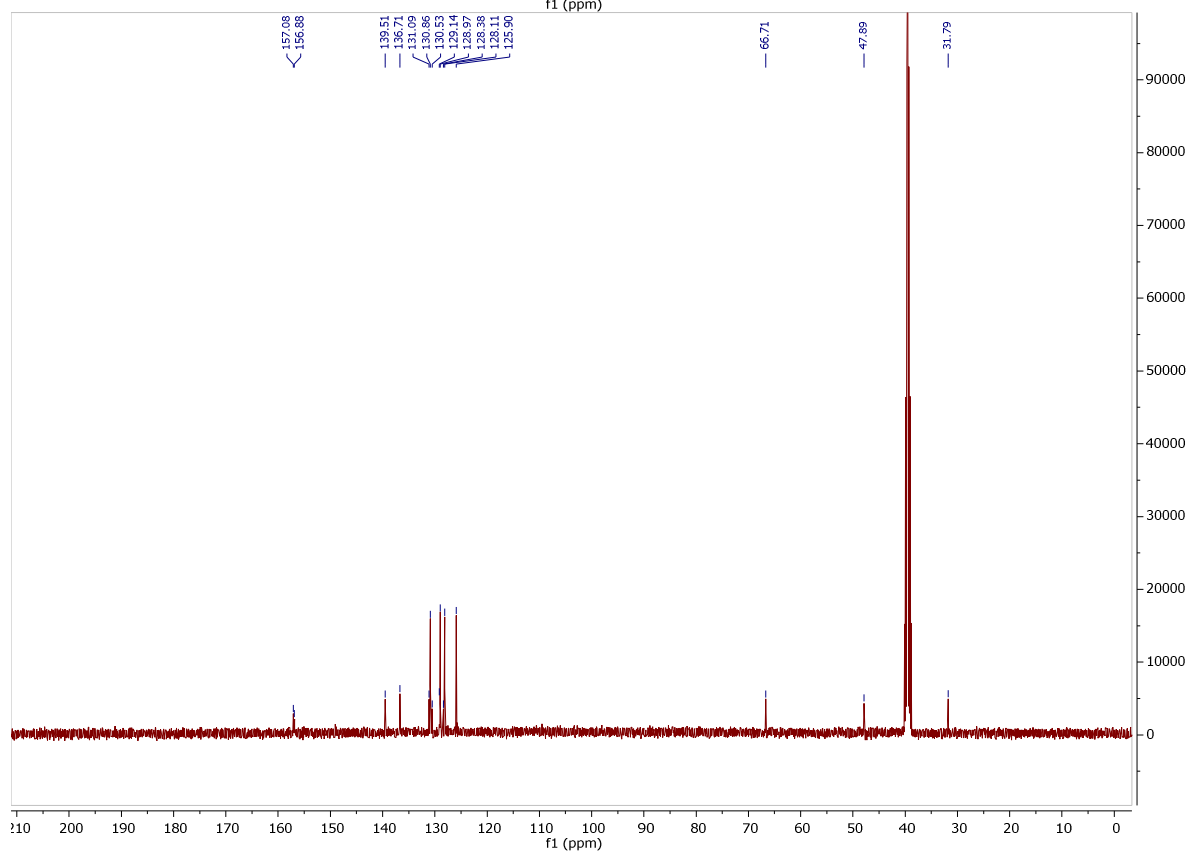

5d

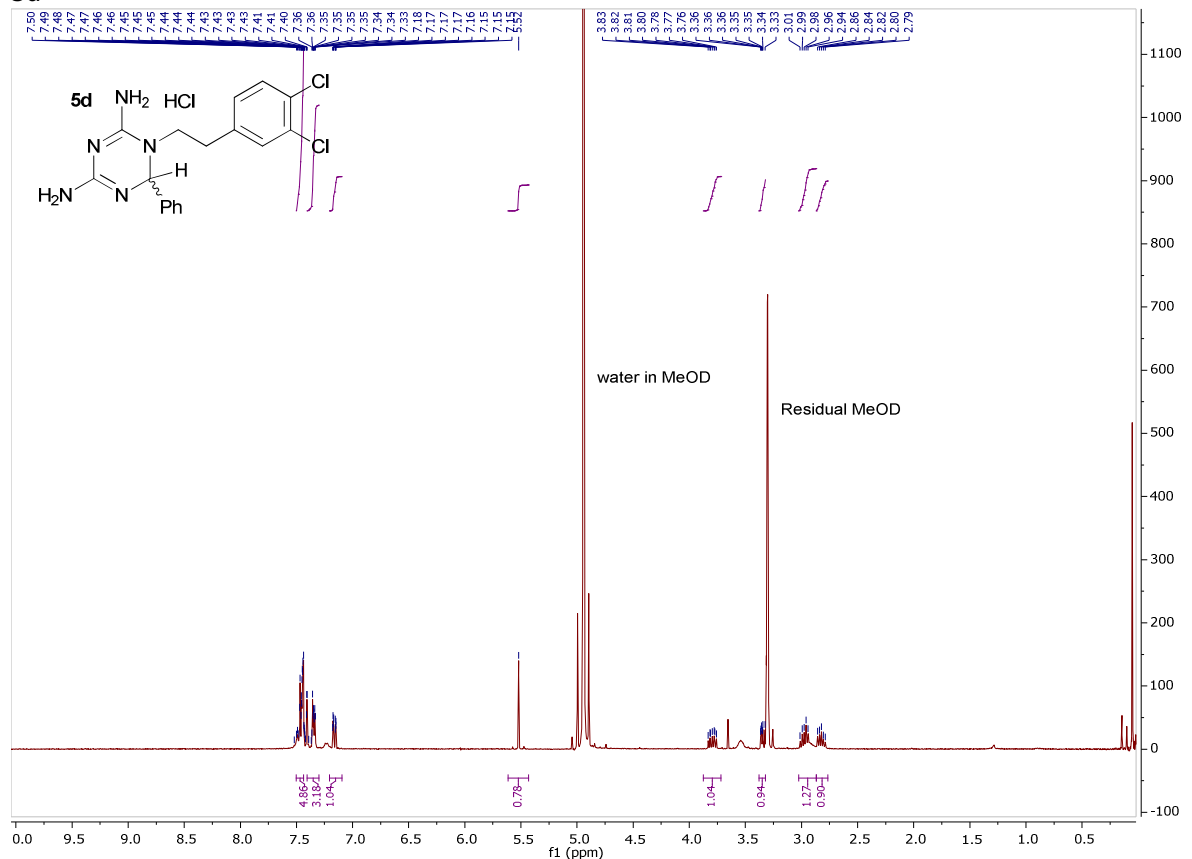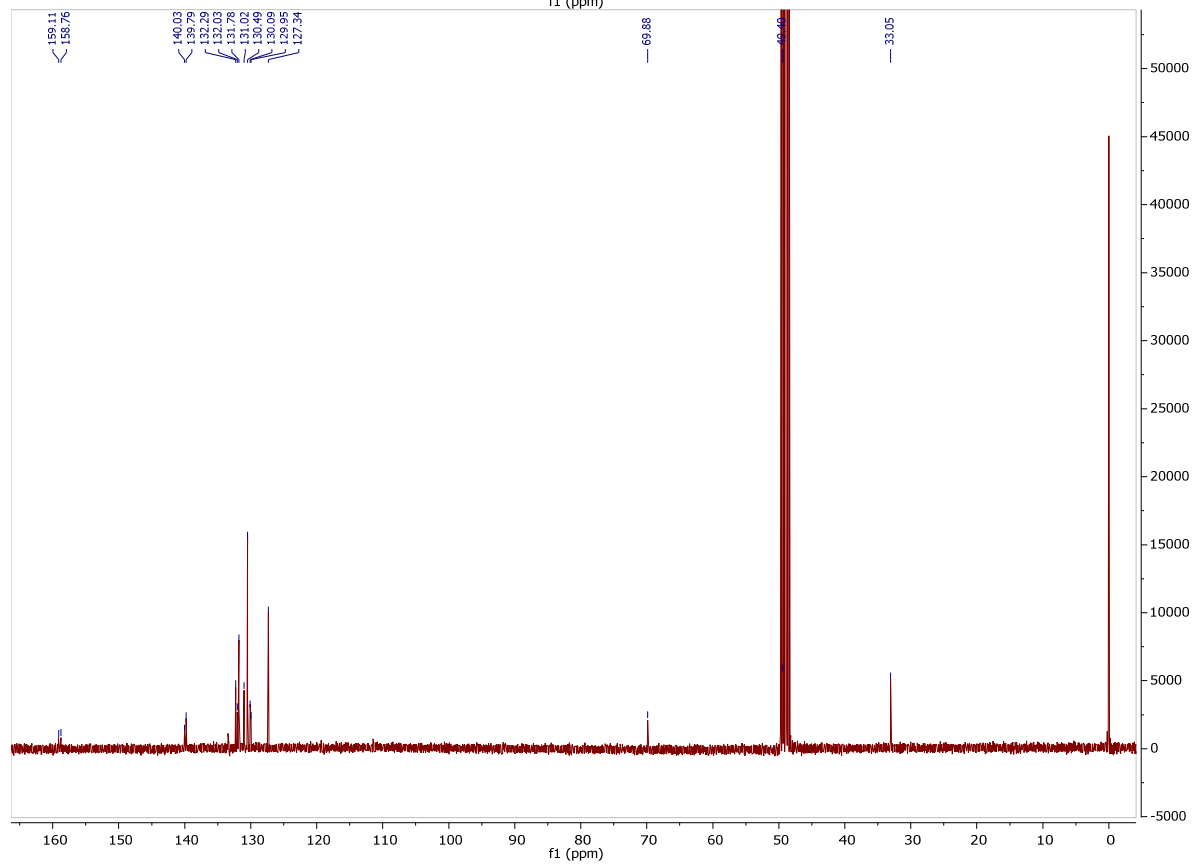

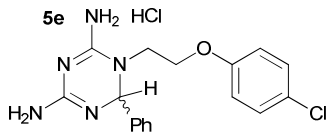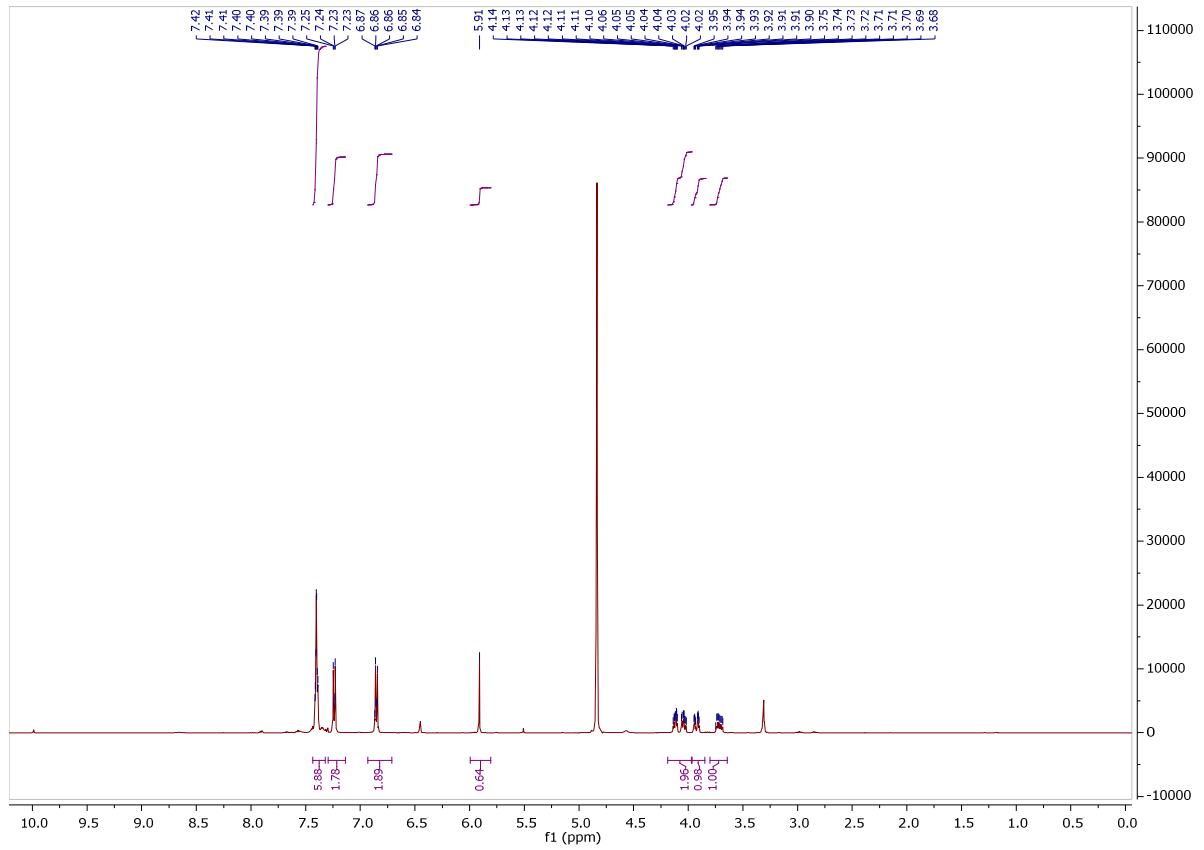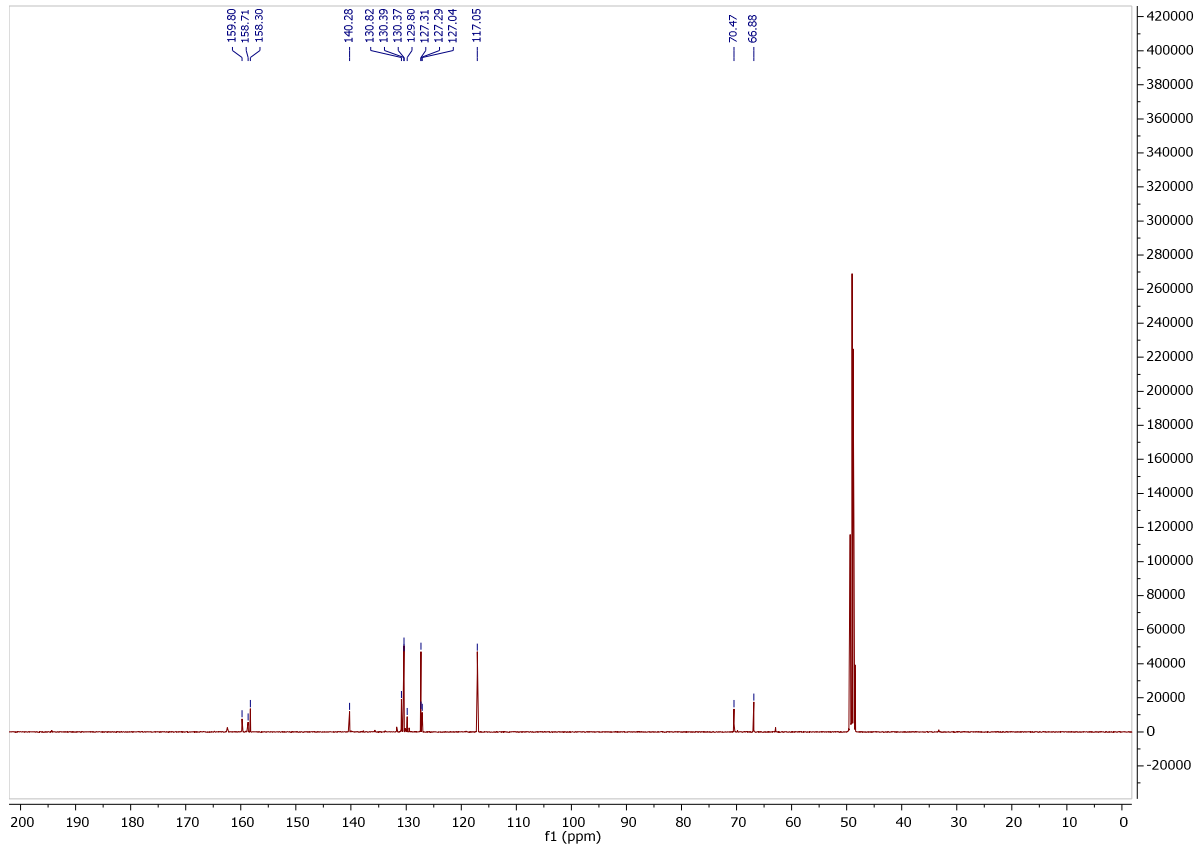

5f

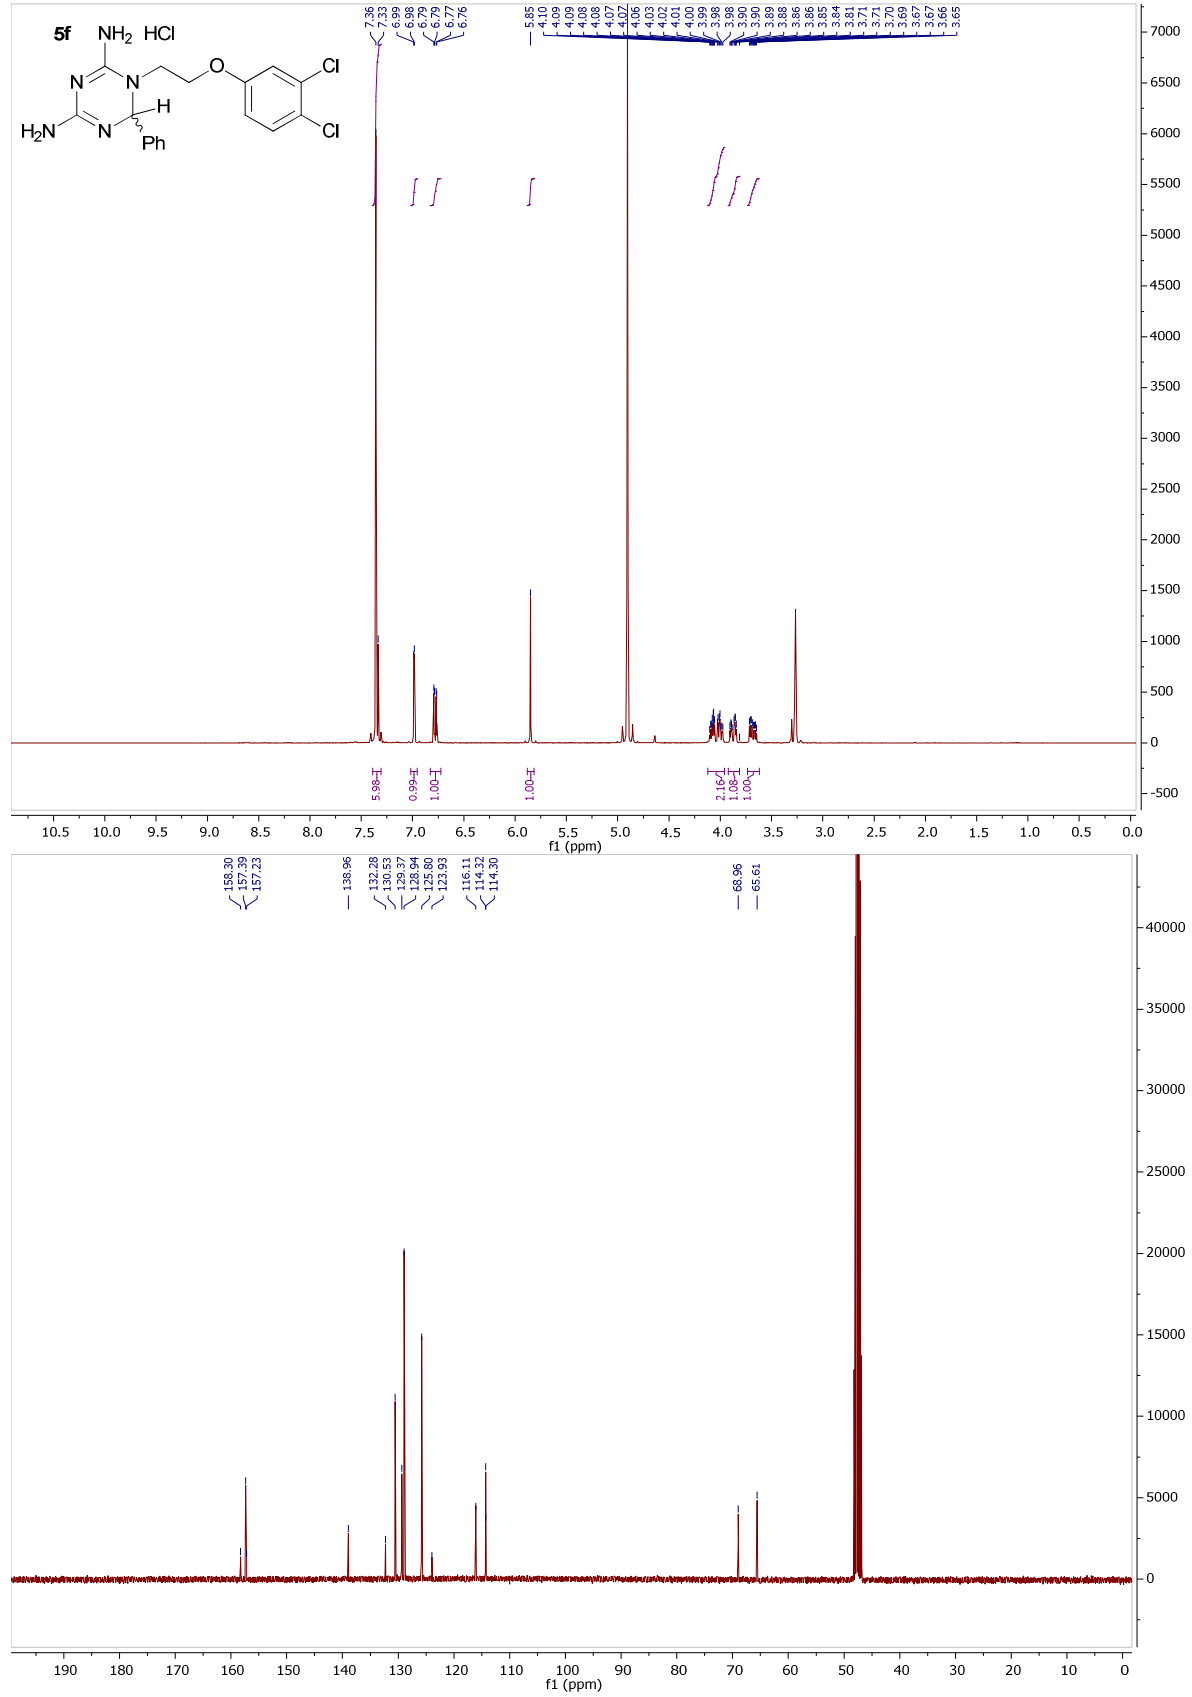

5g

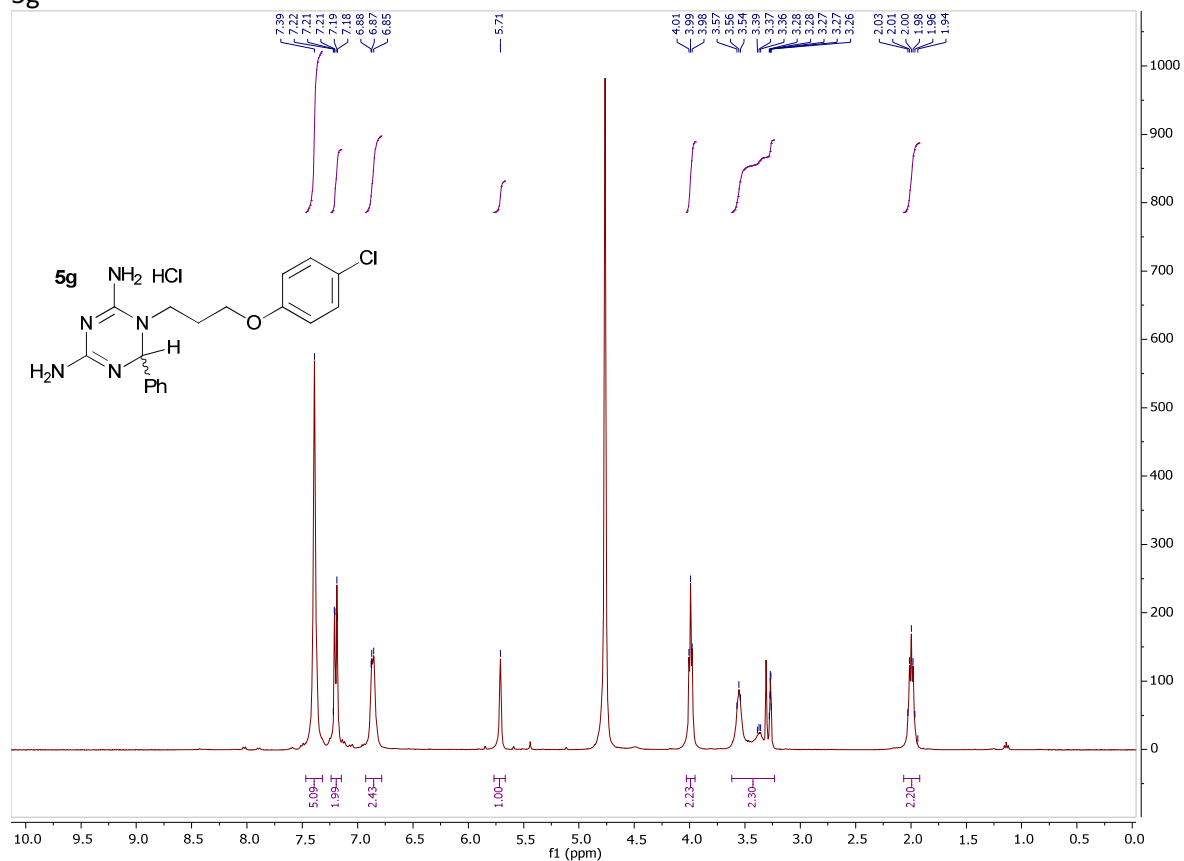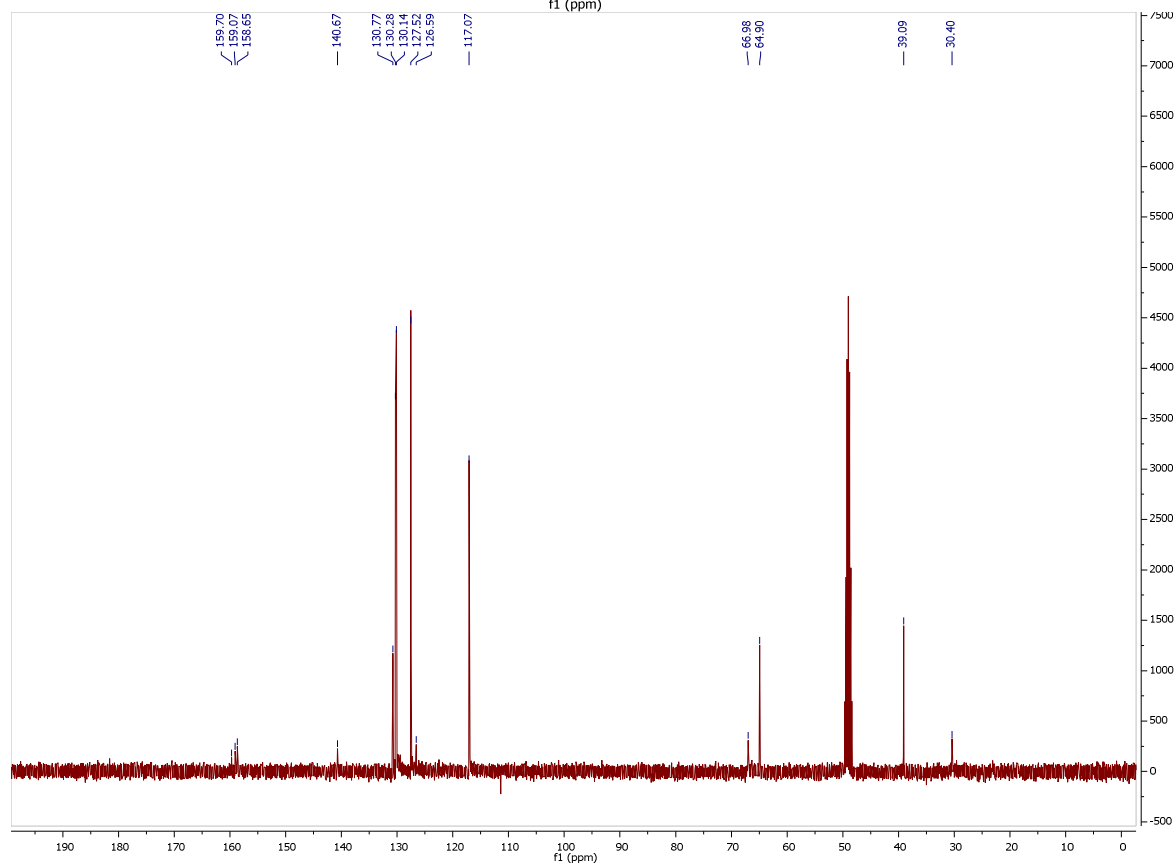



5h

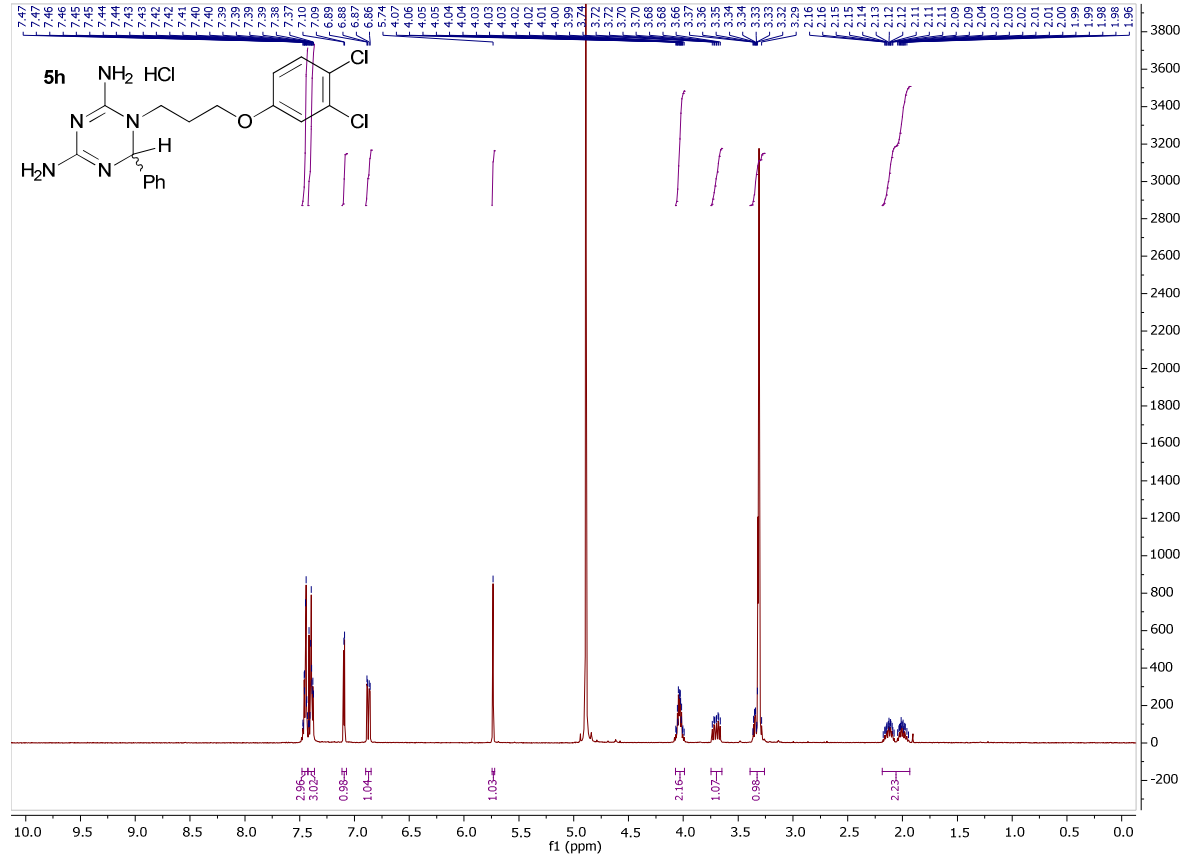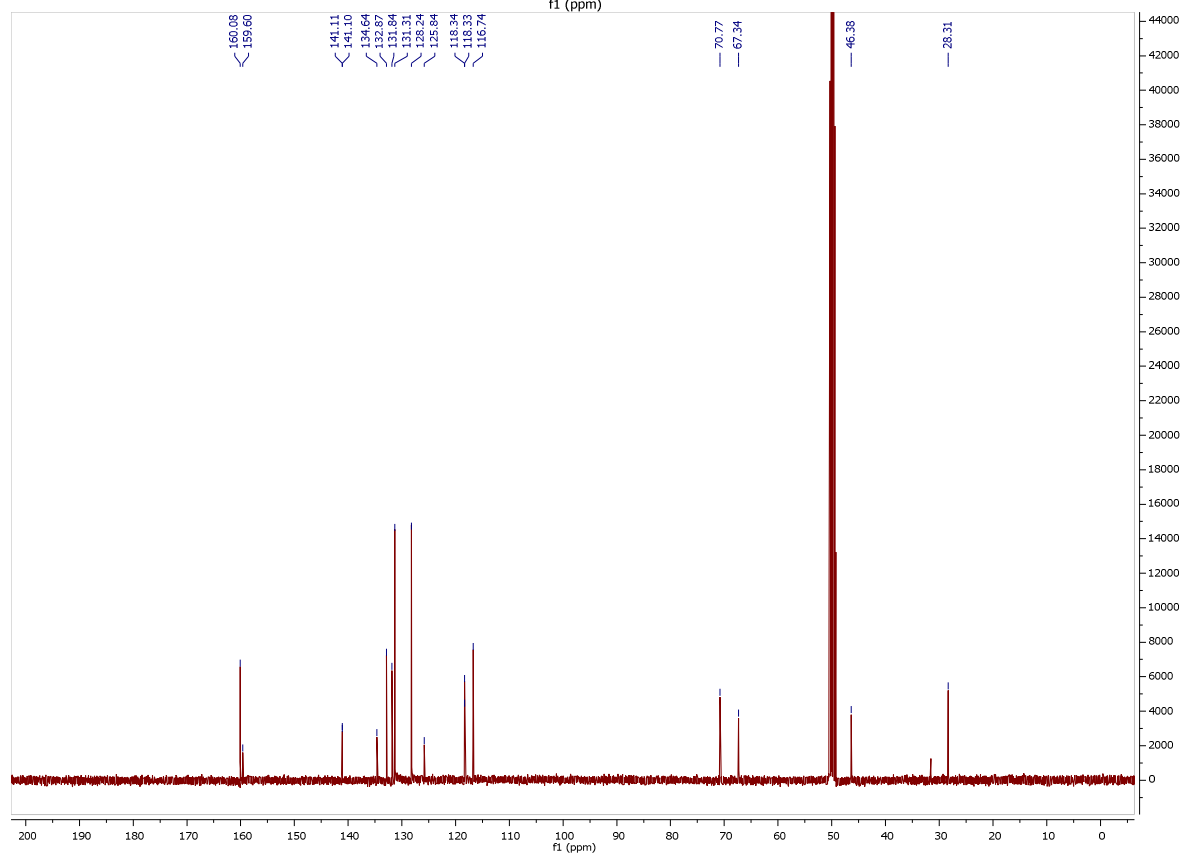

10a

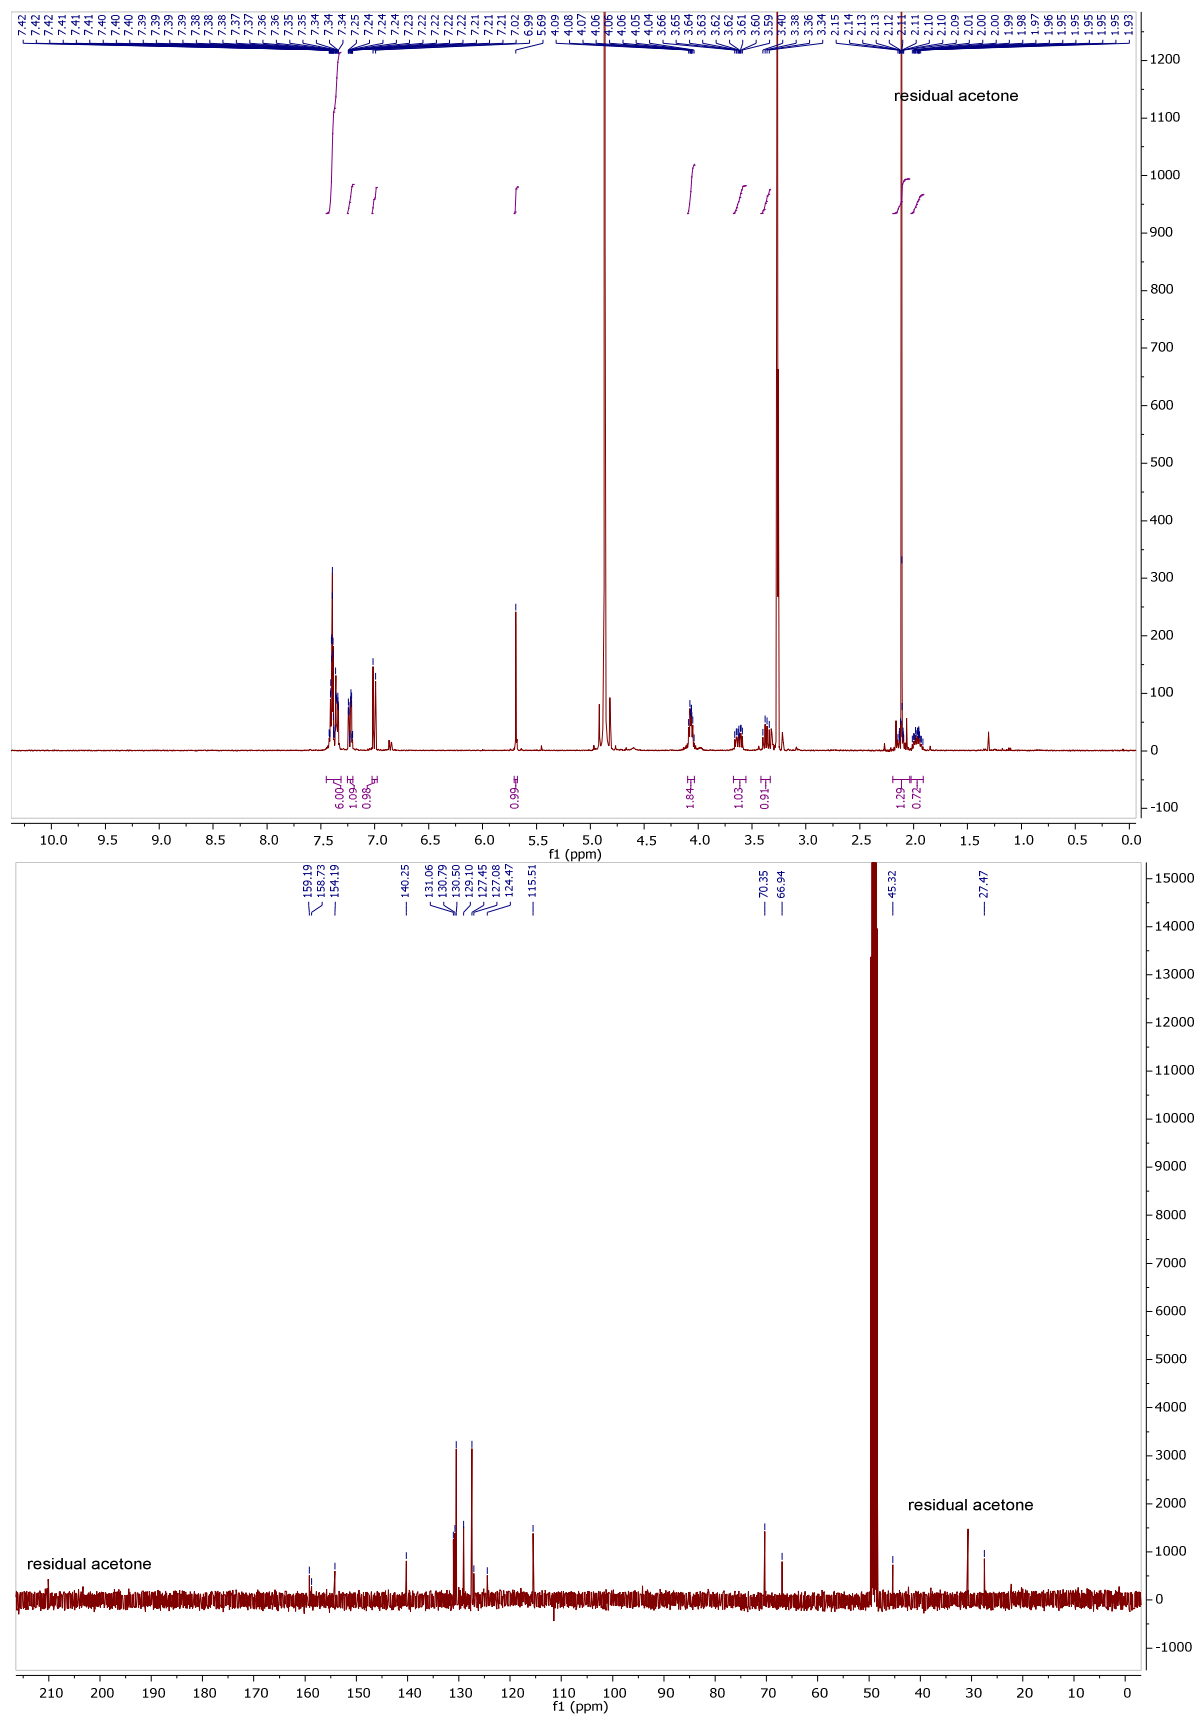

10c

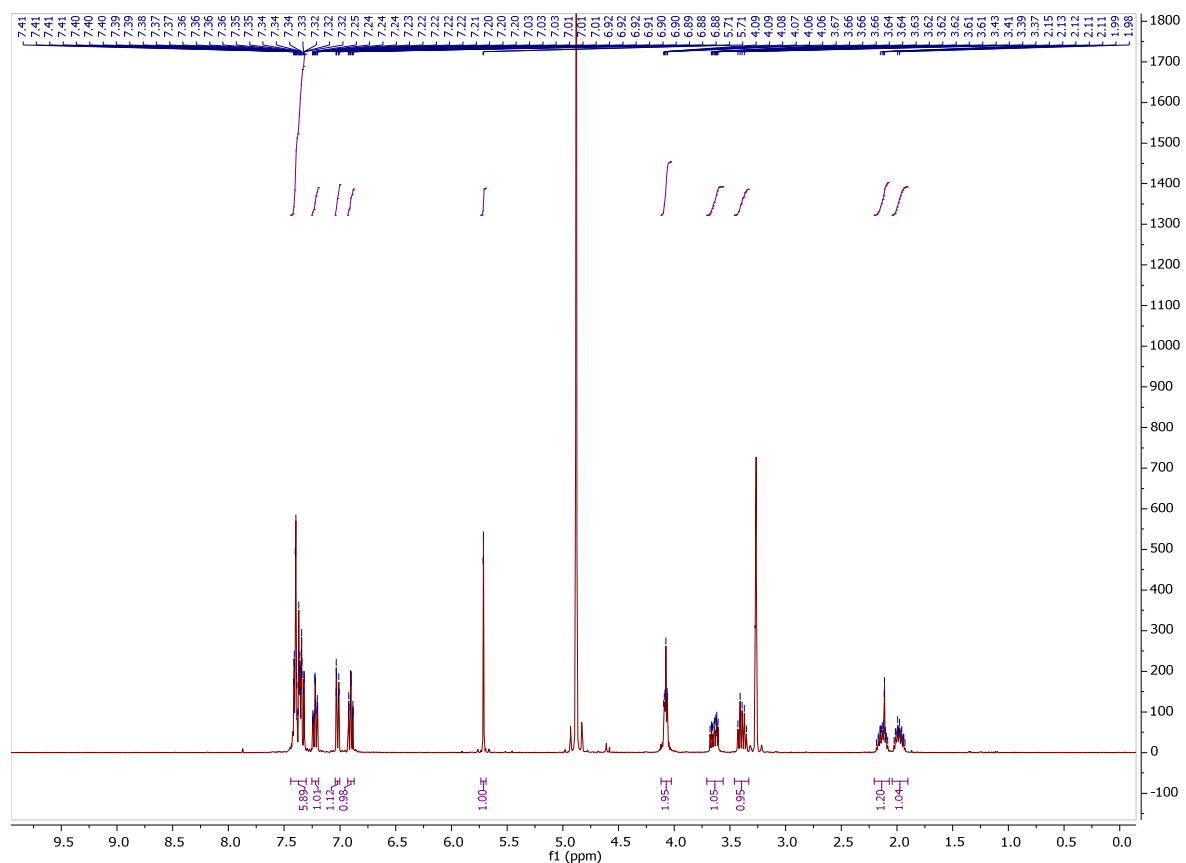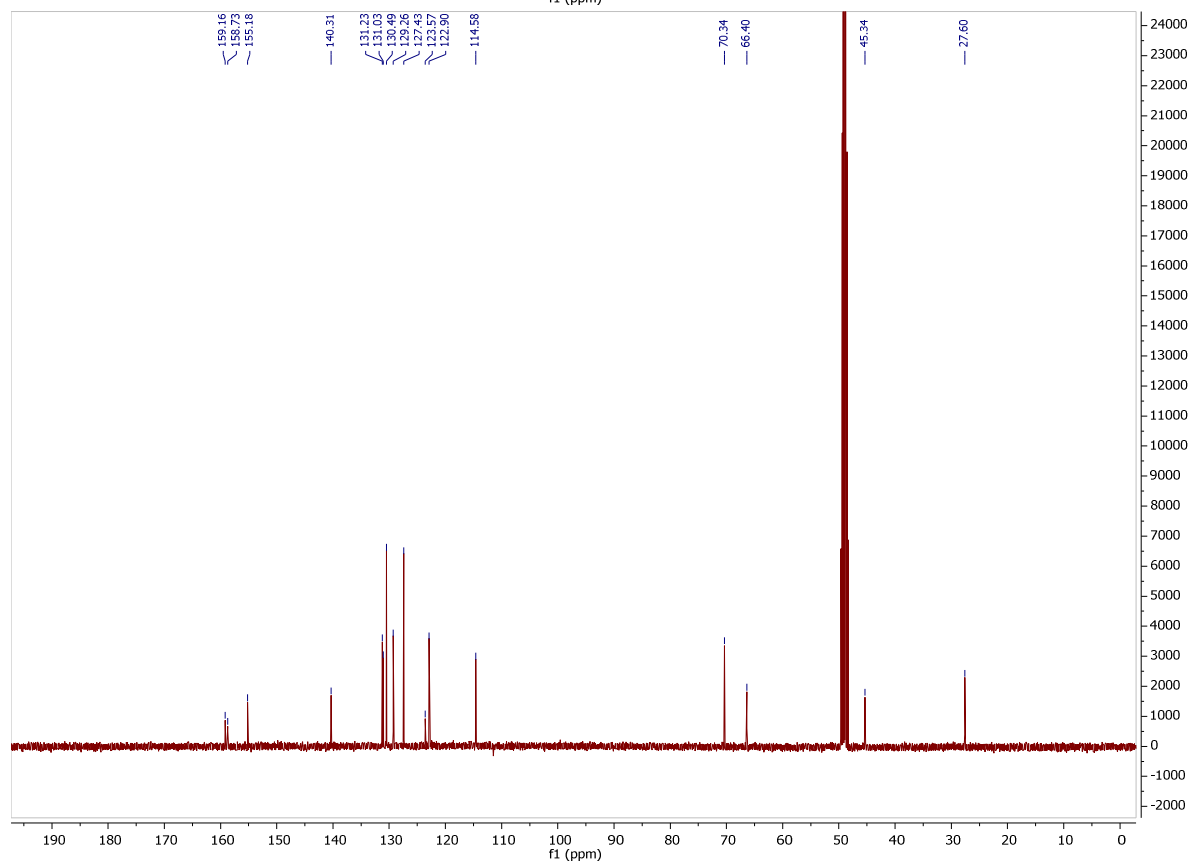

10d

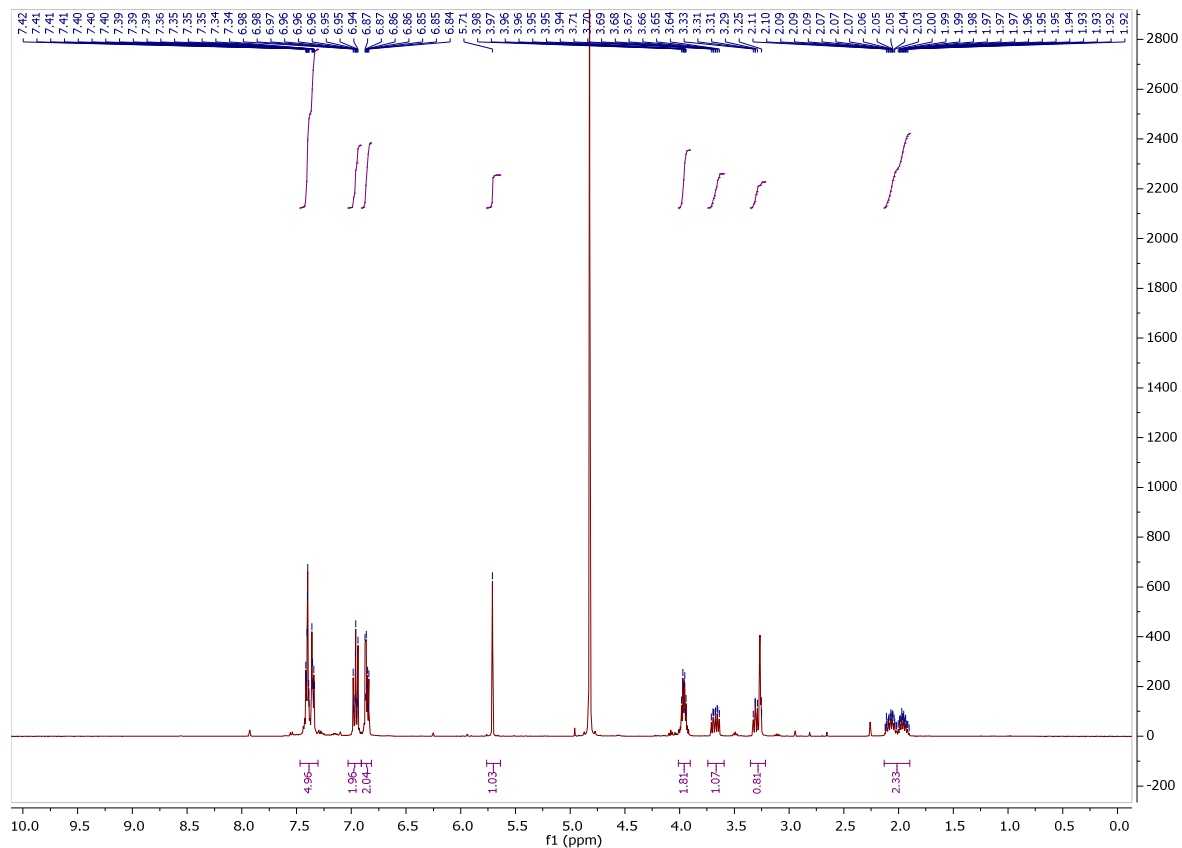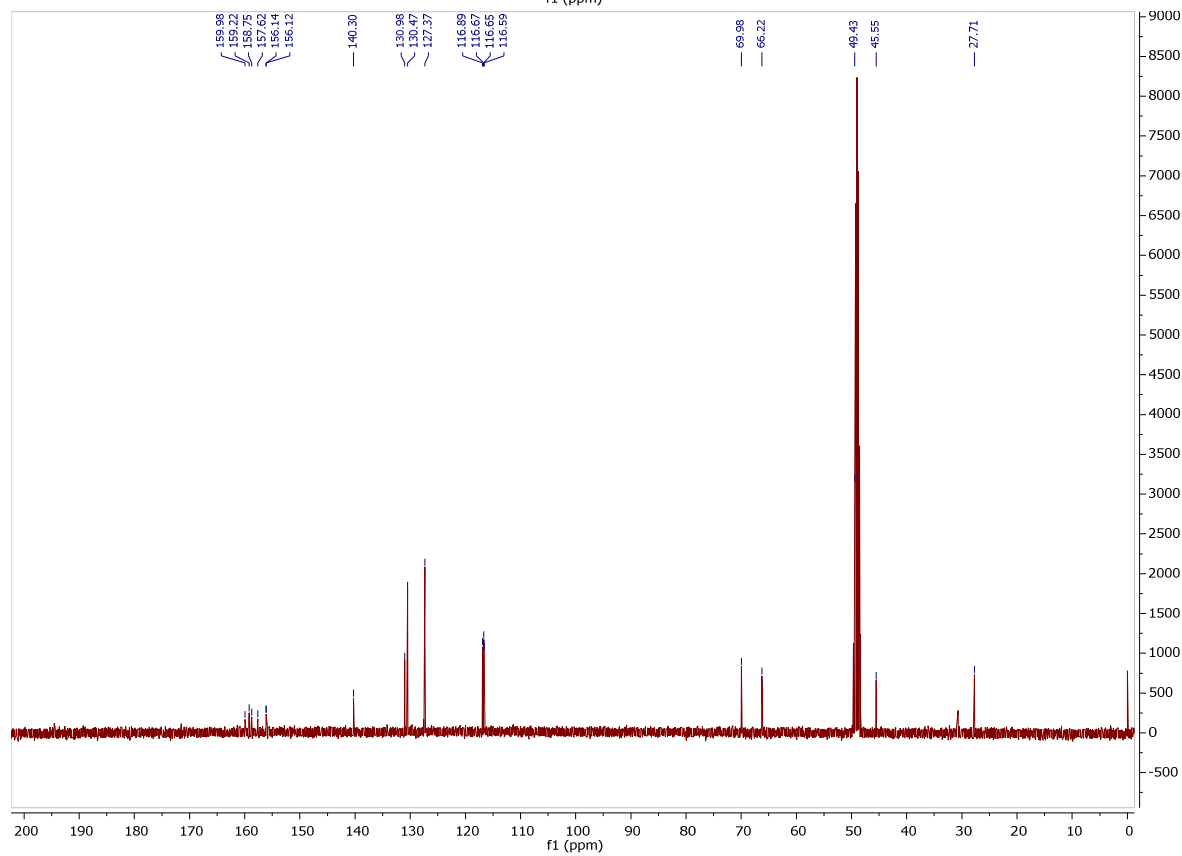

10e

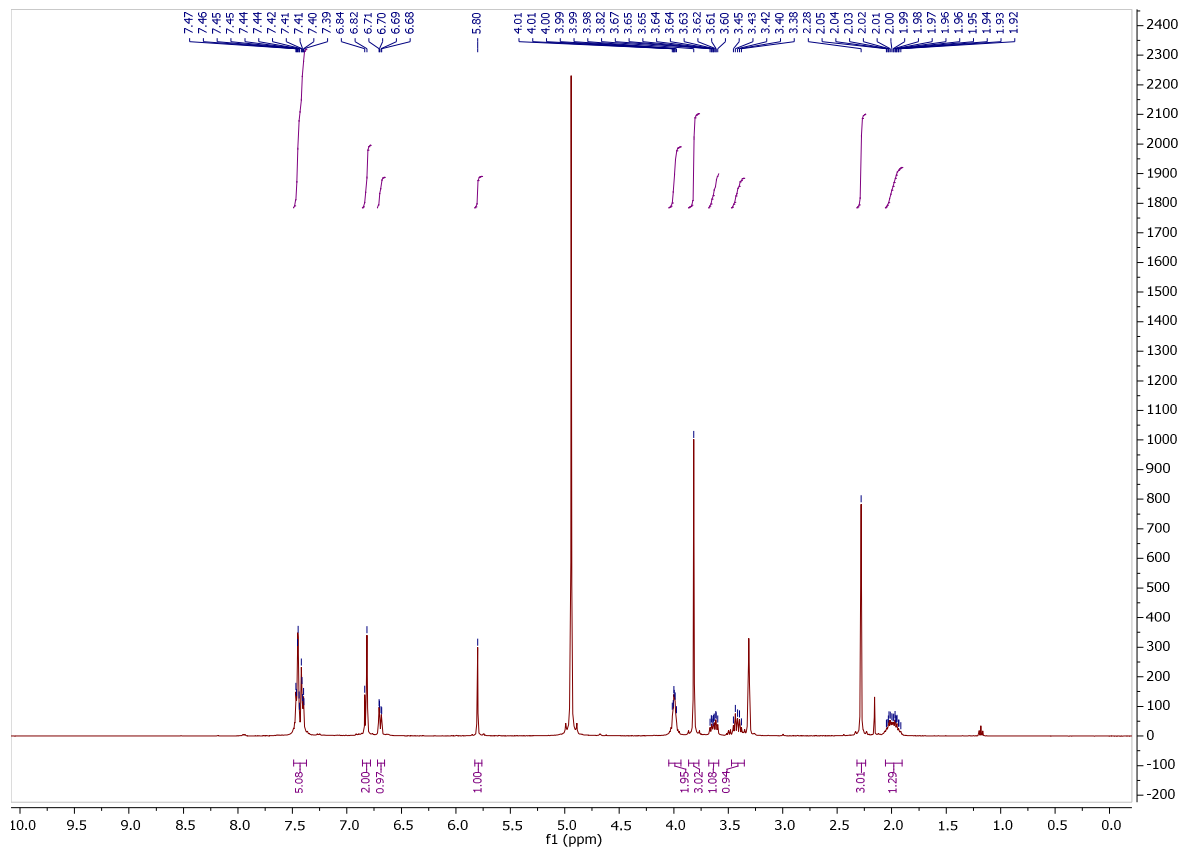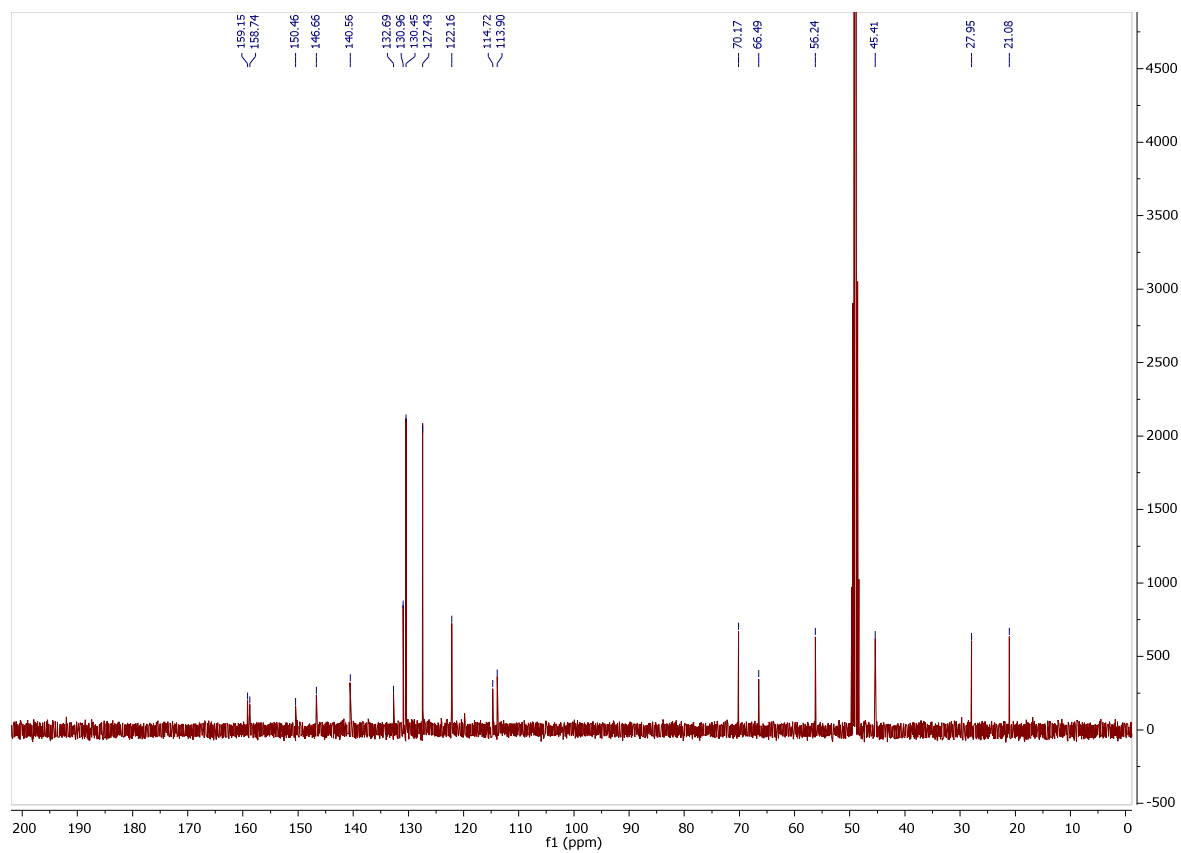

10f

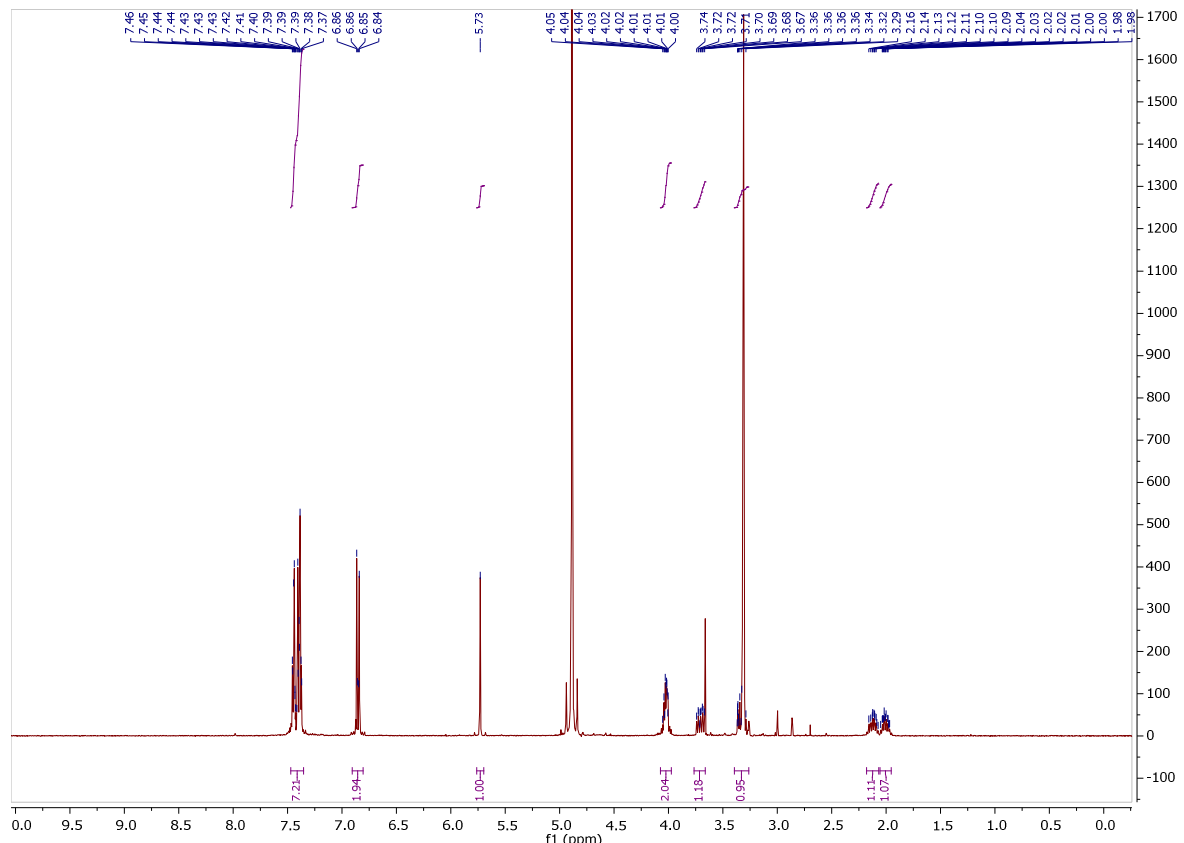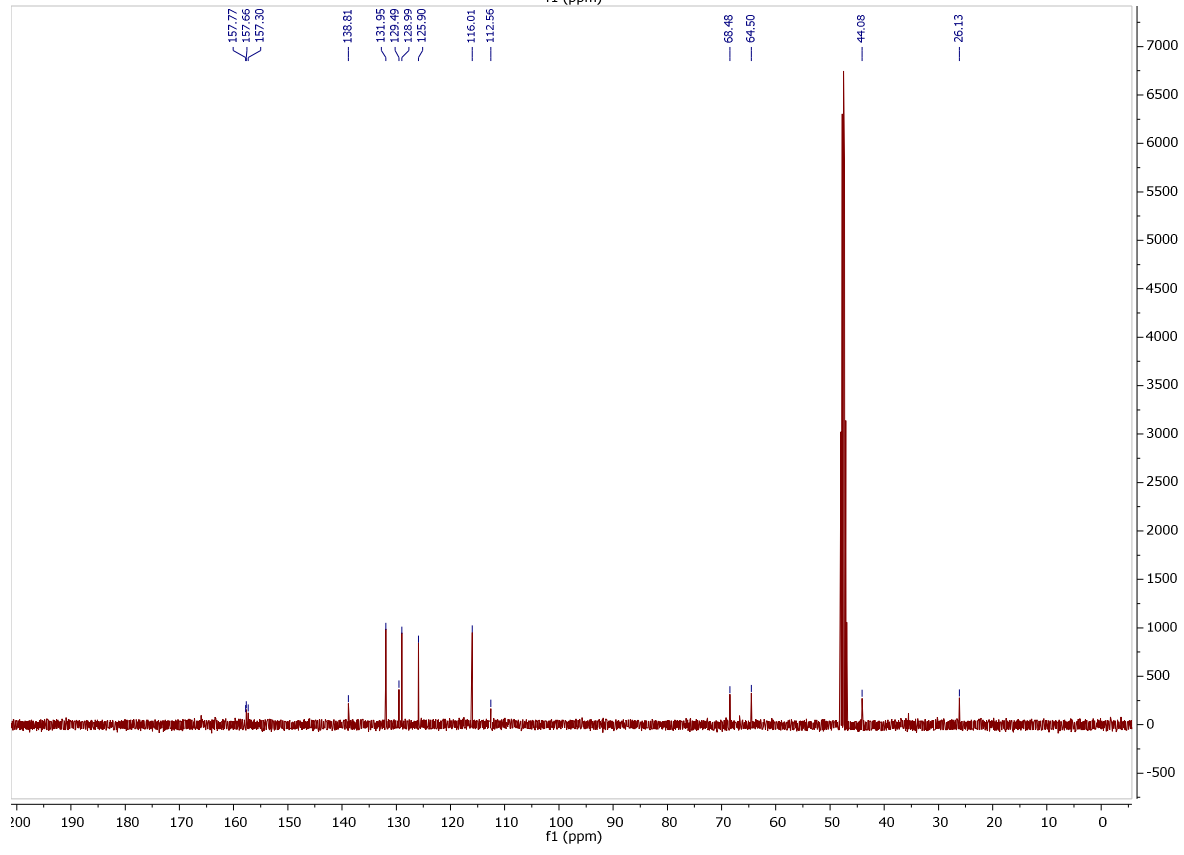

10g

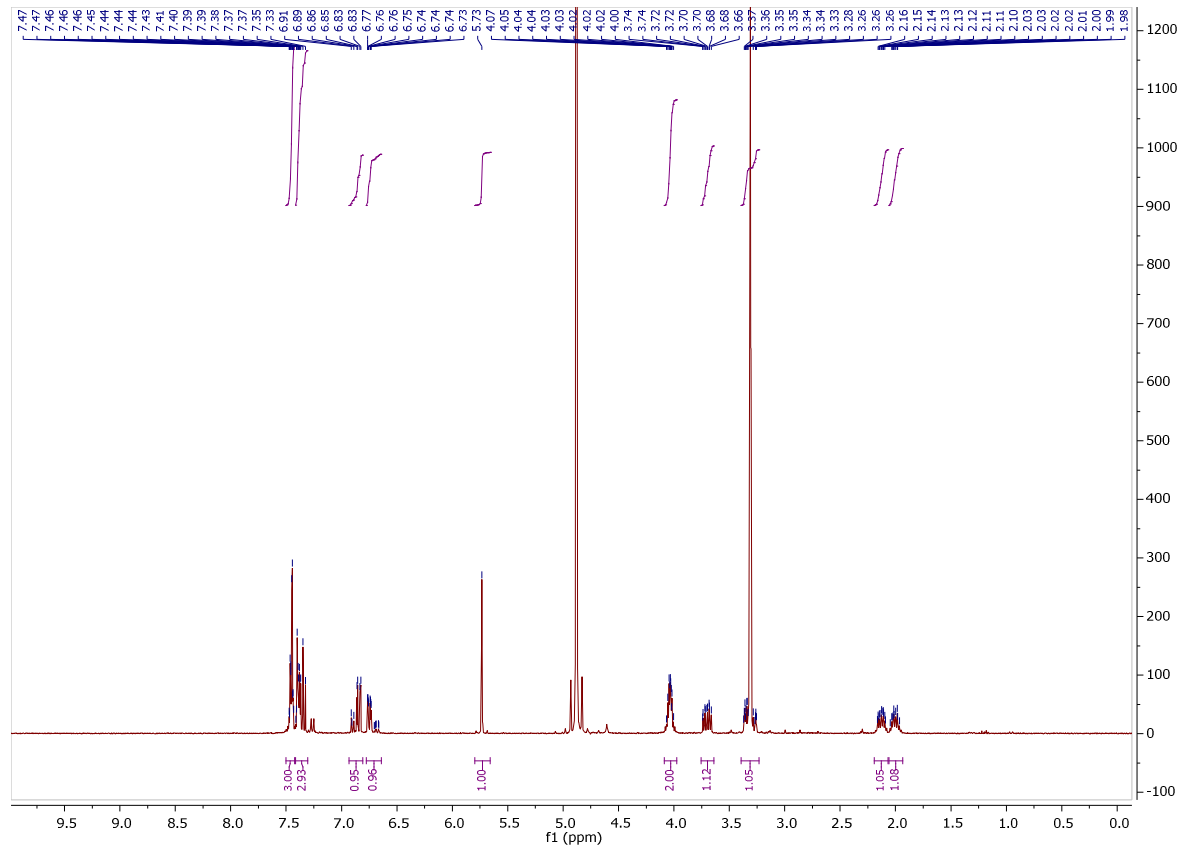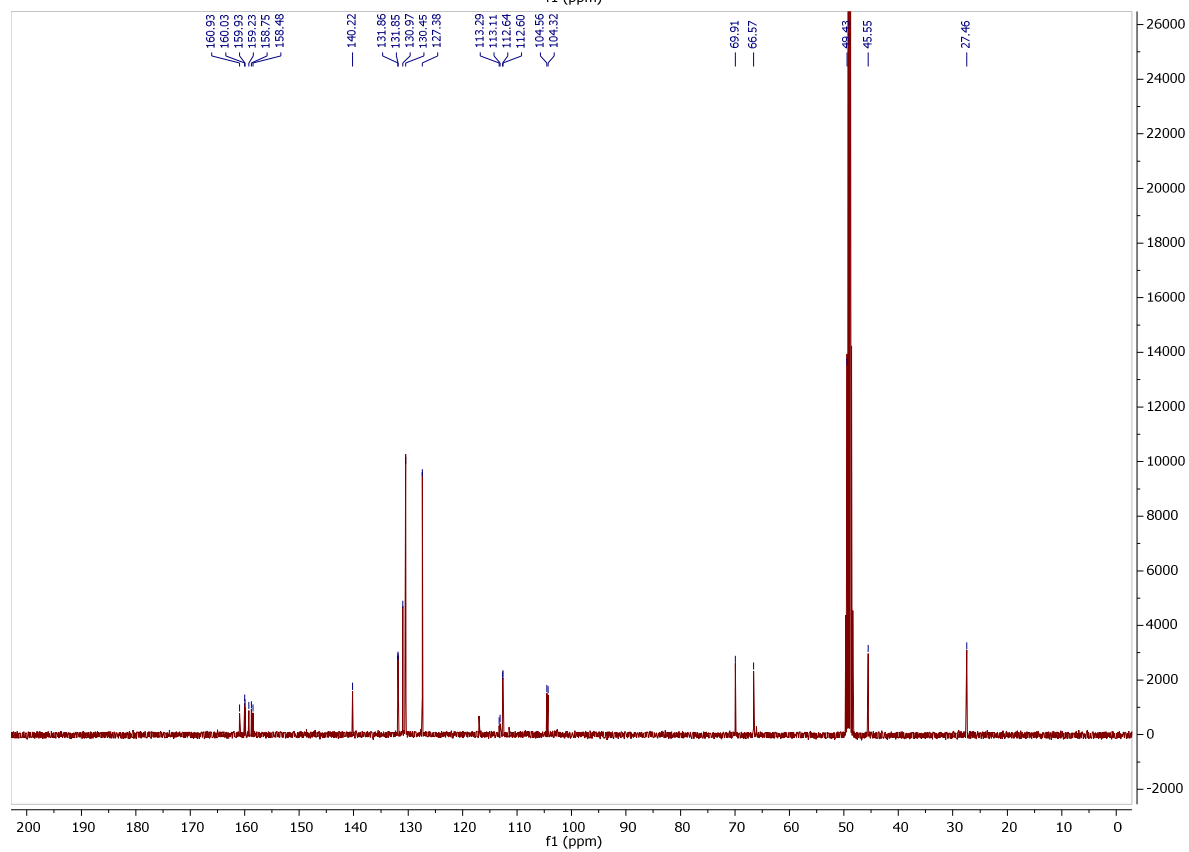

10h

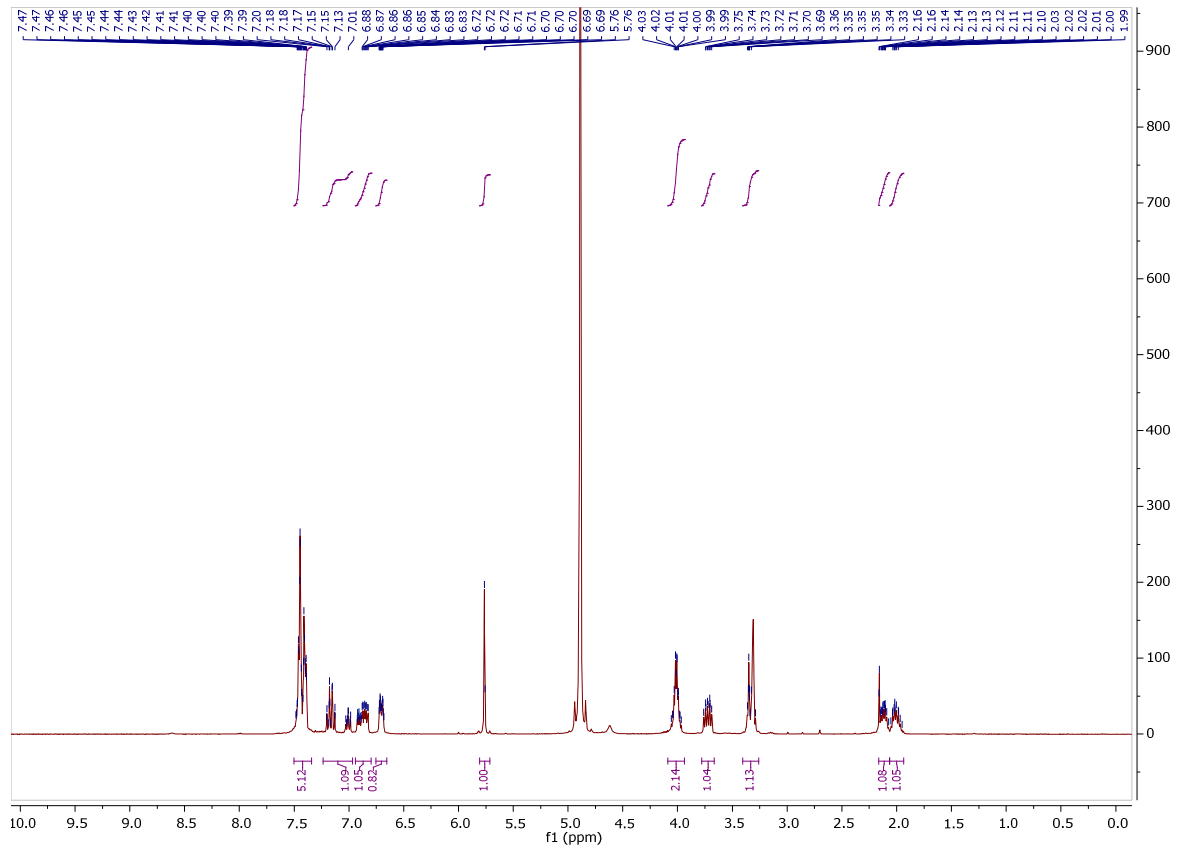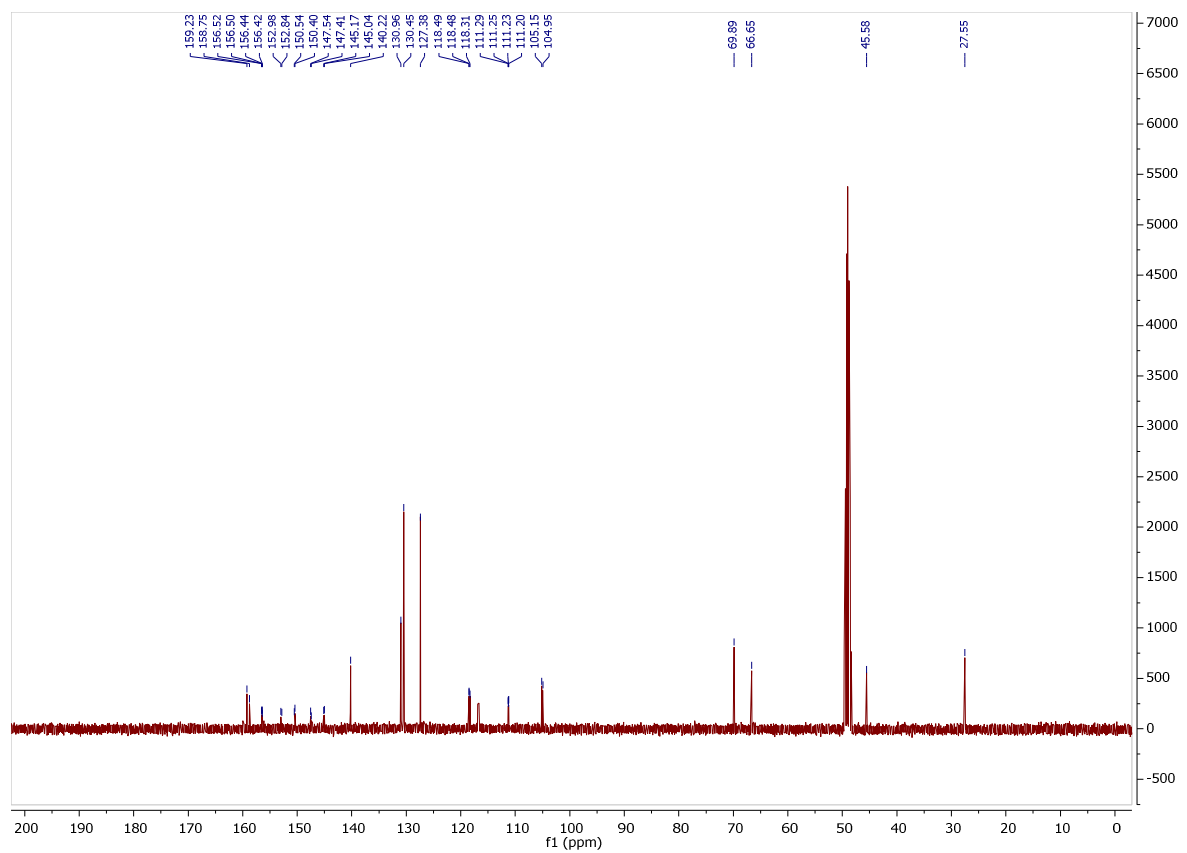



11a

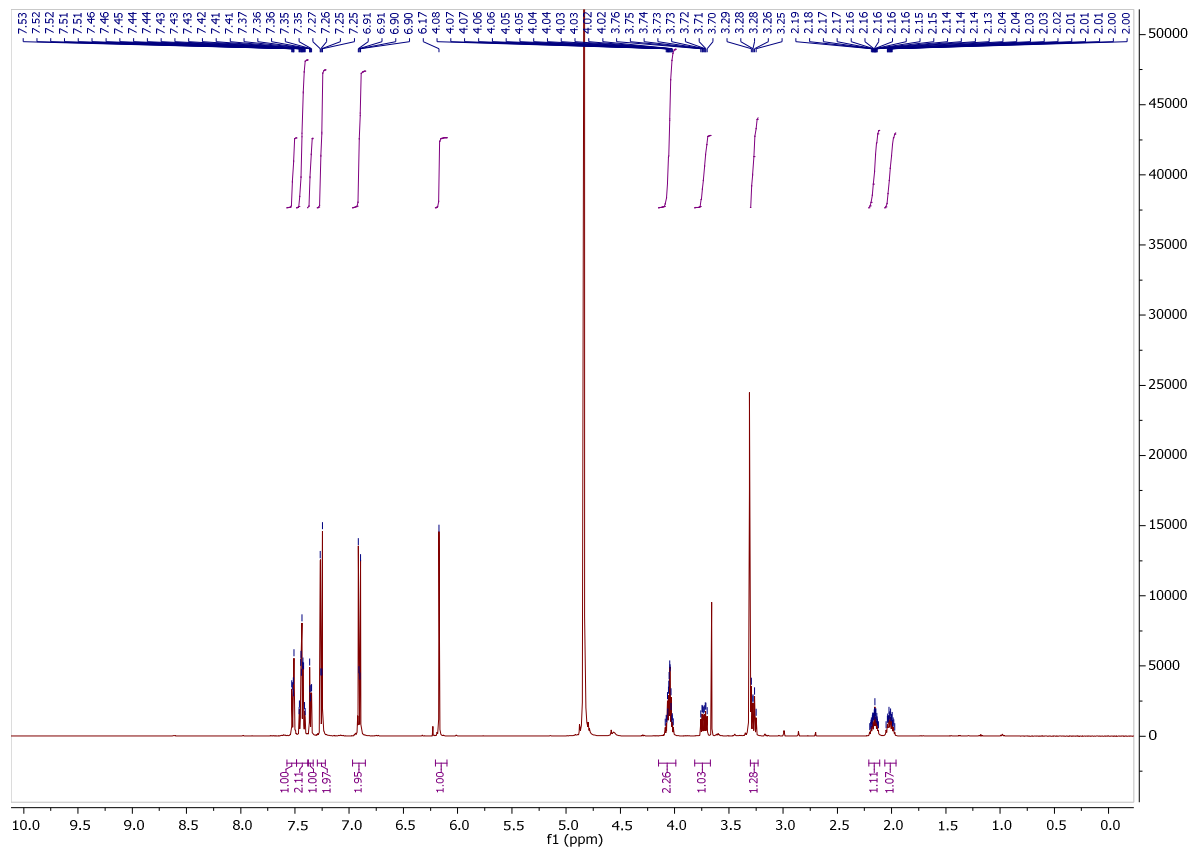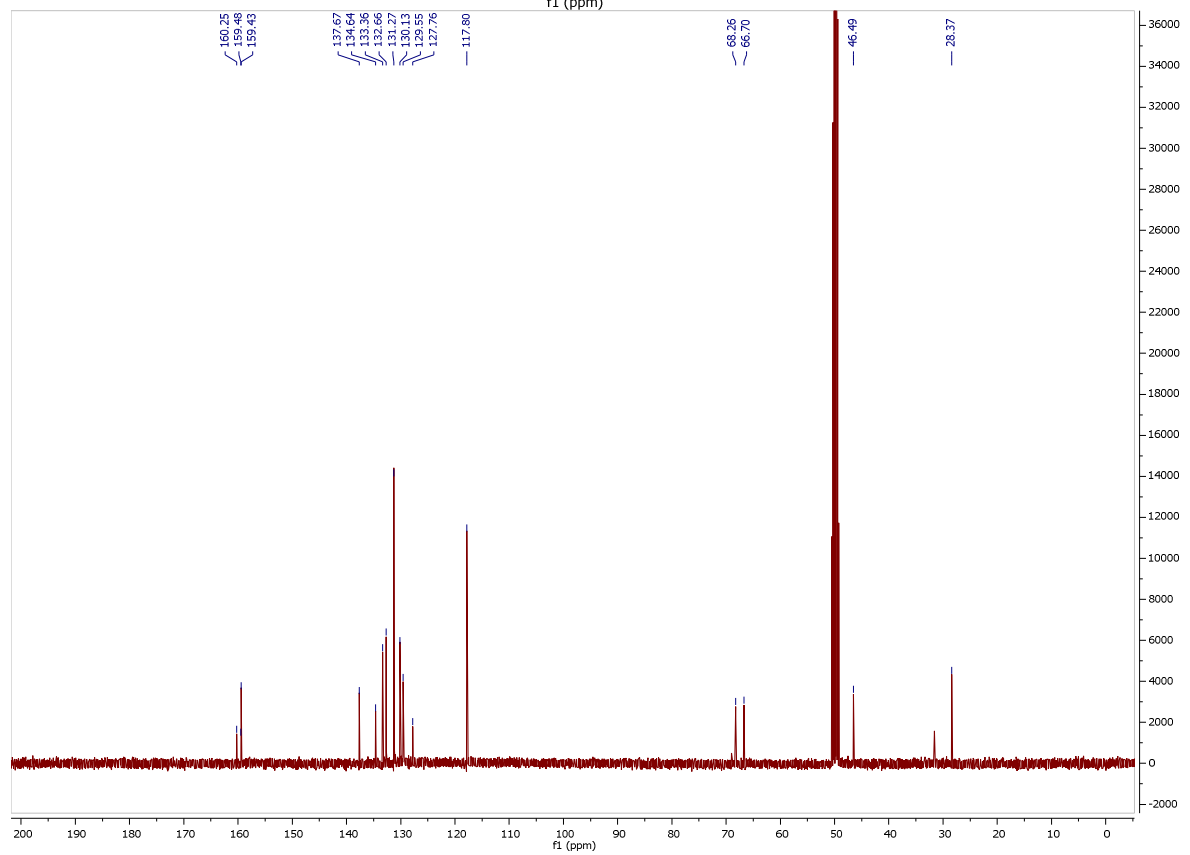

11b

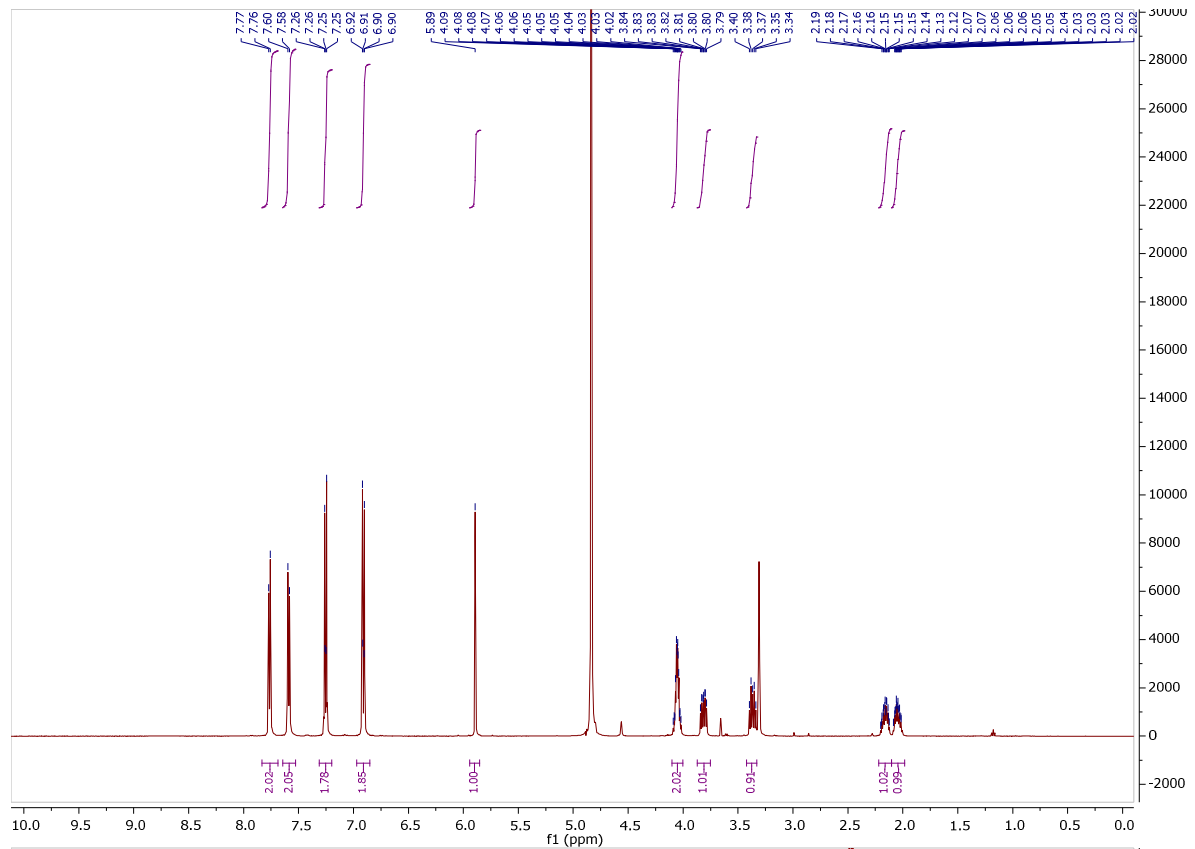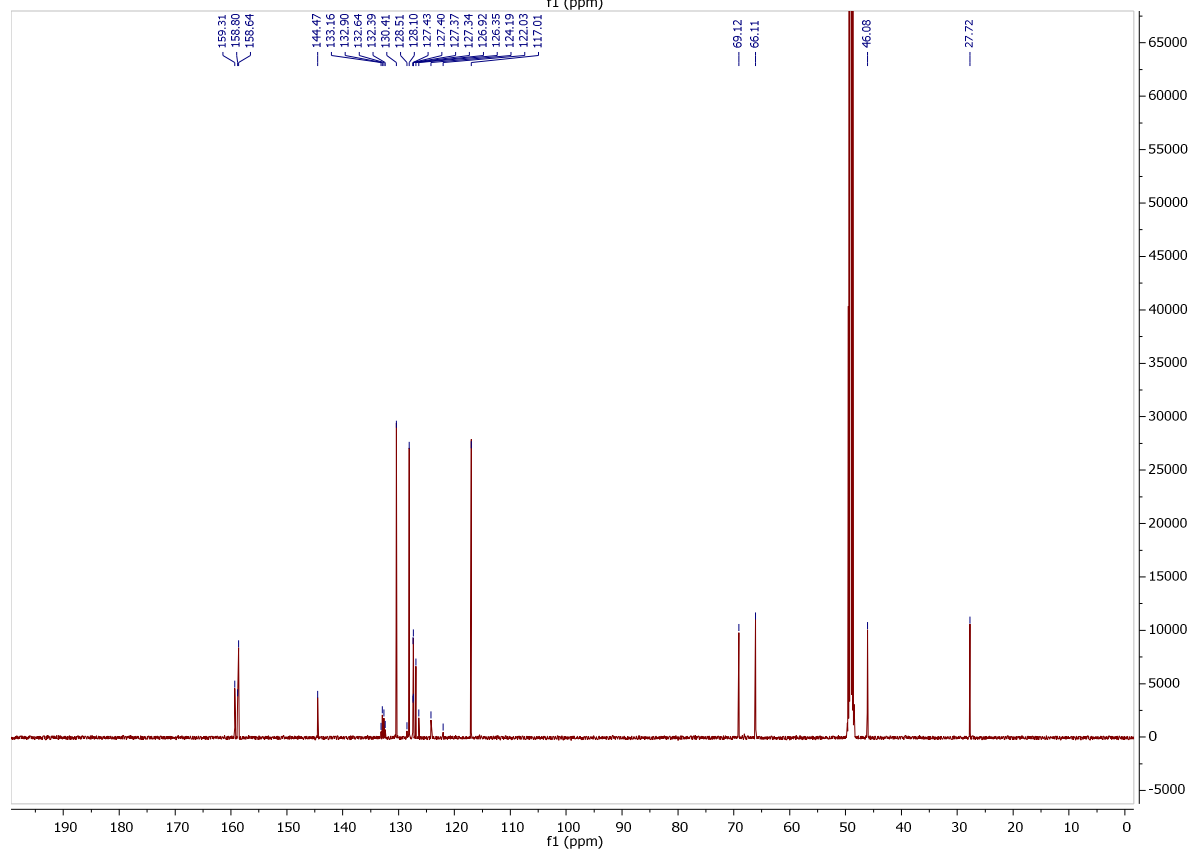

11c

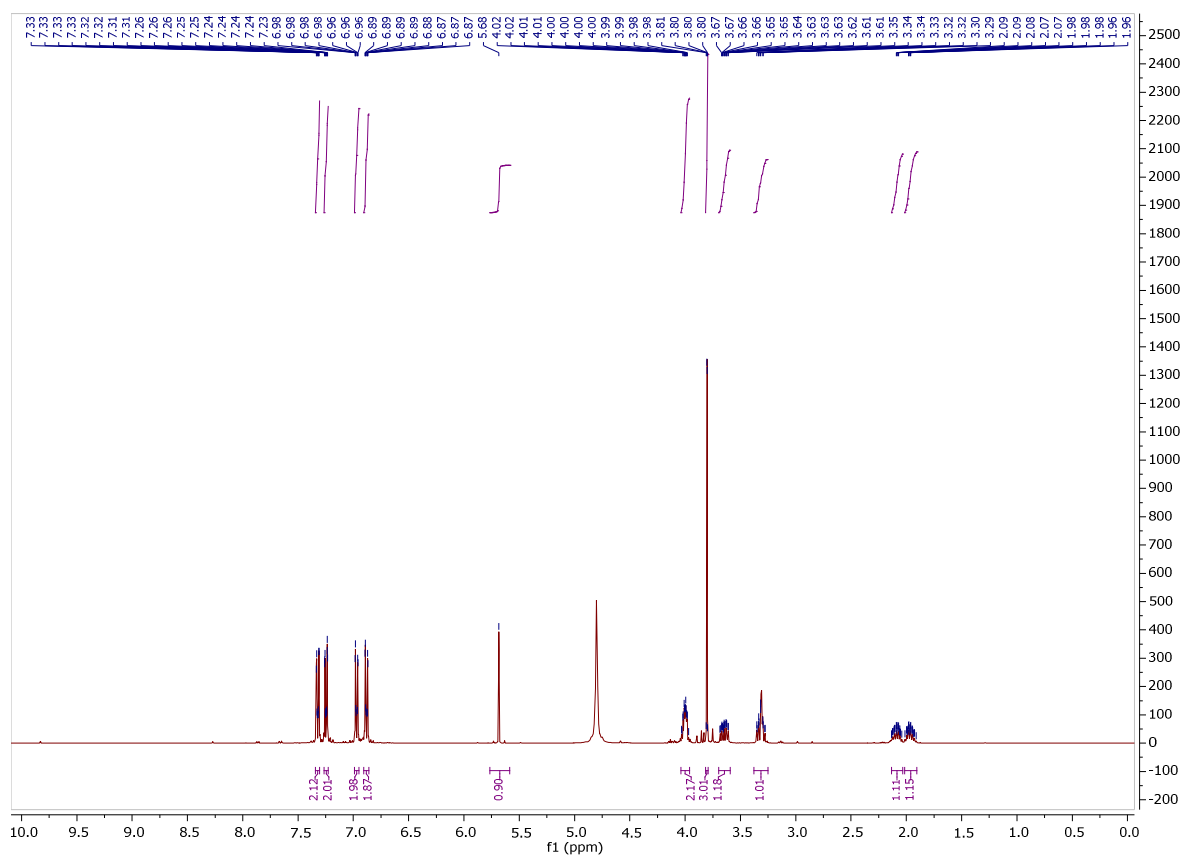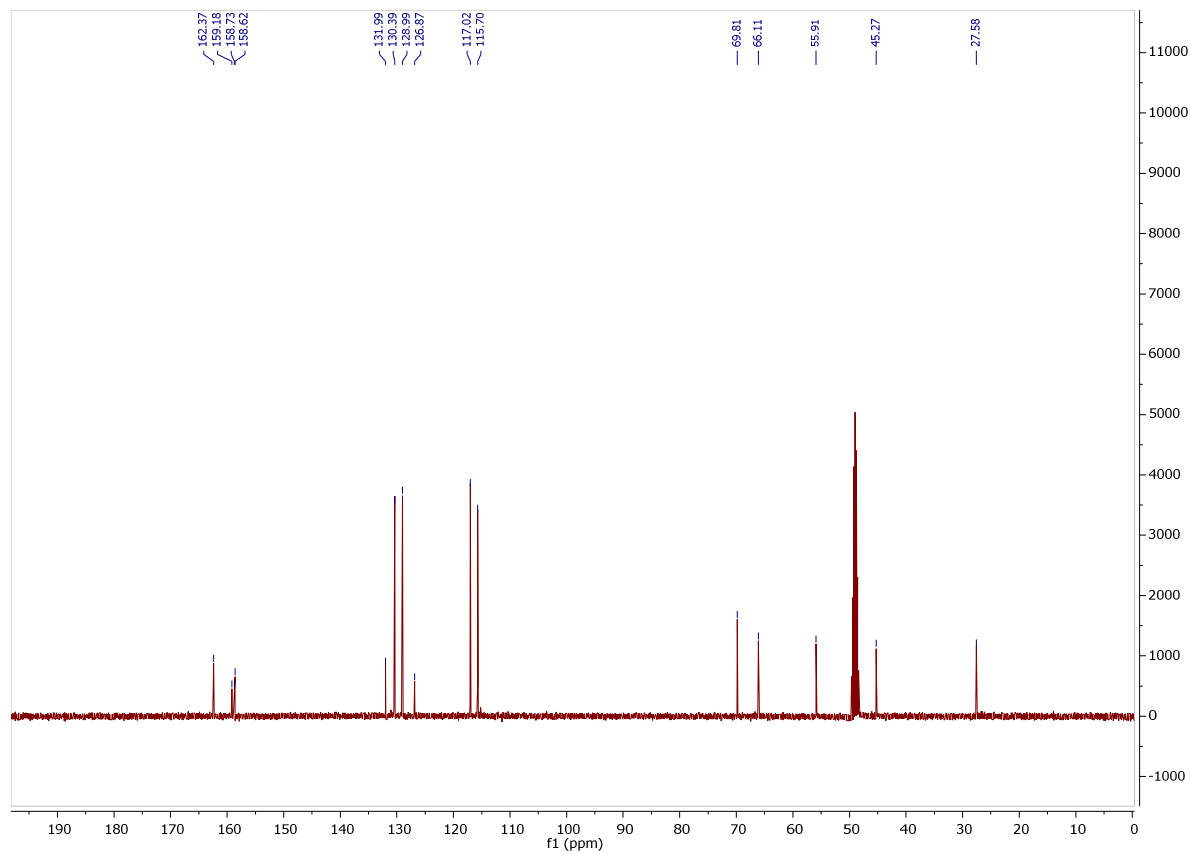

11d

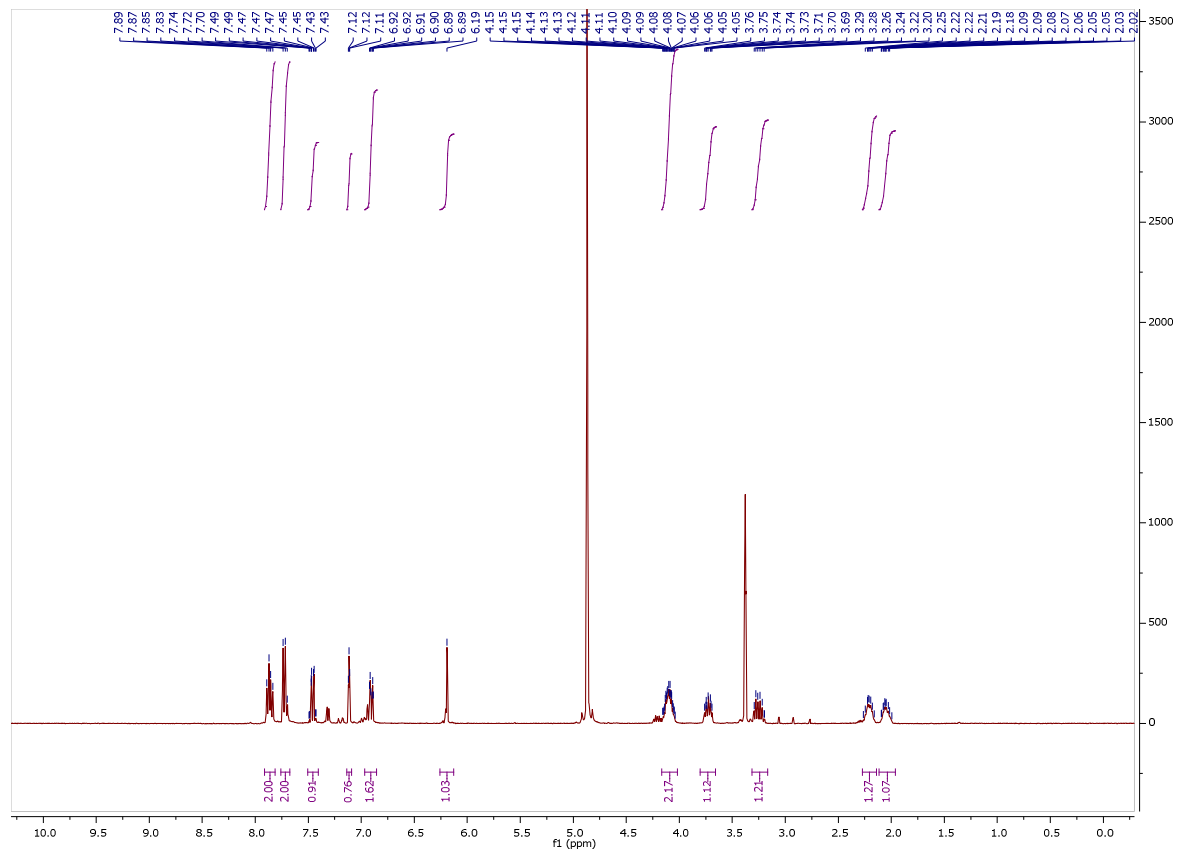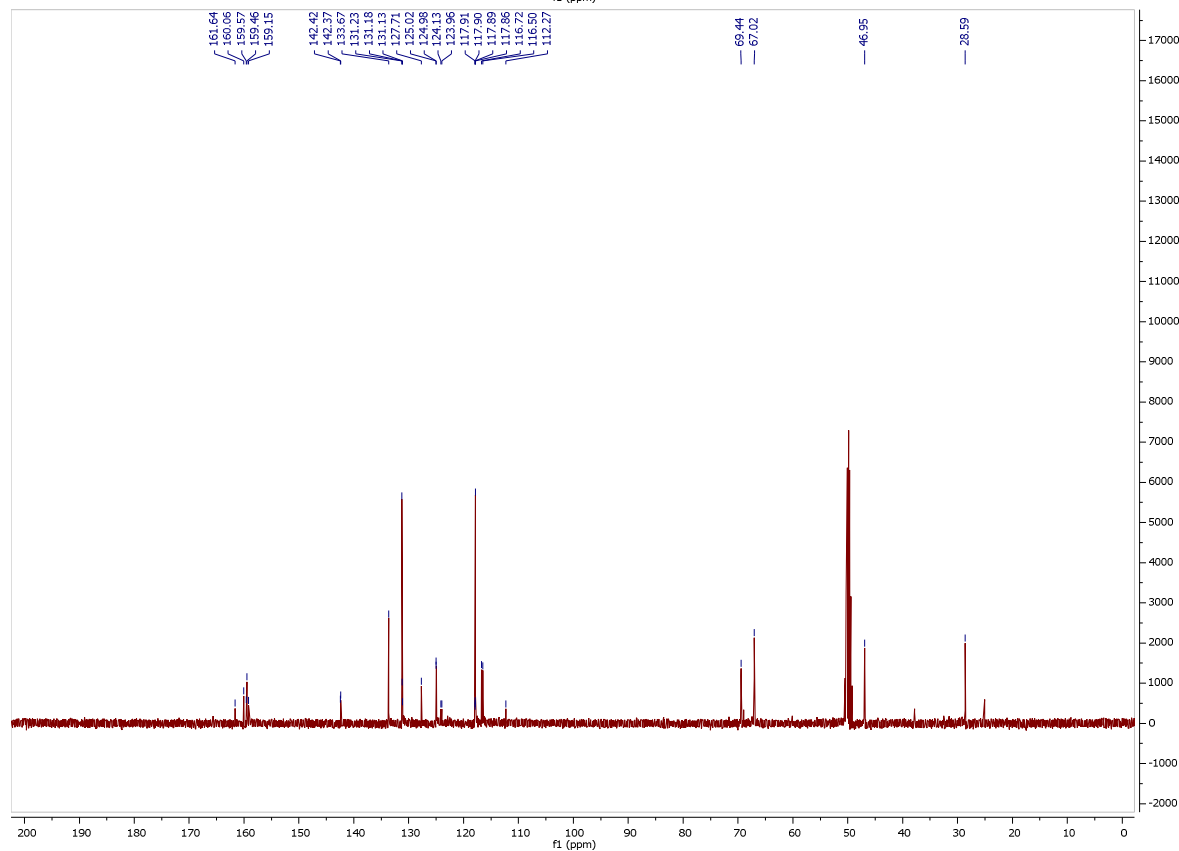

11e

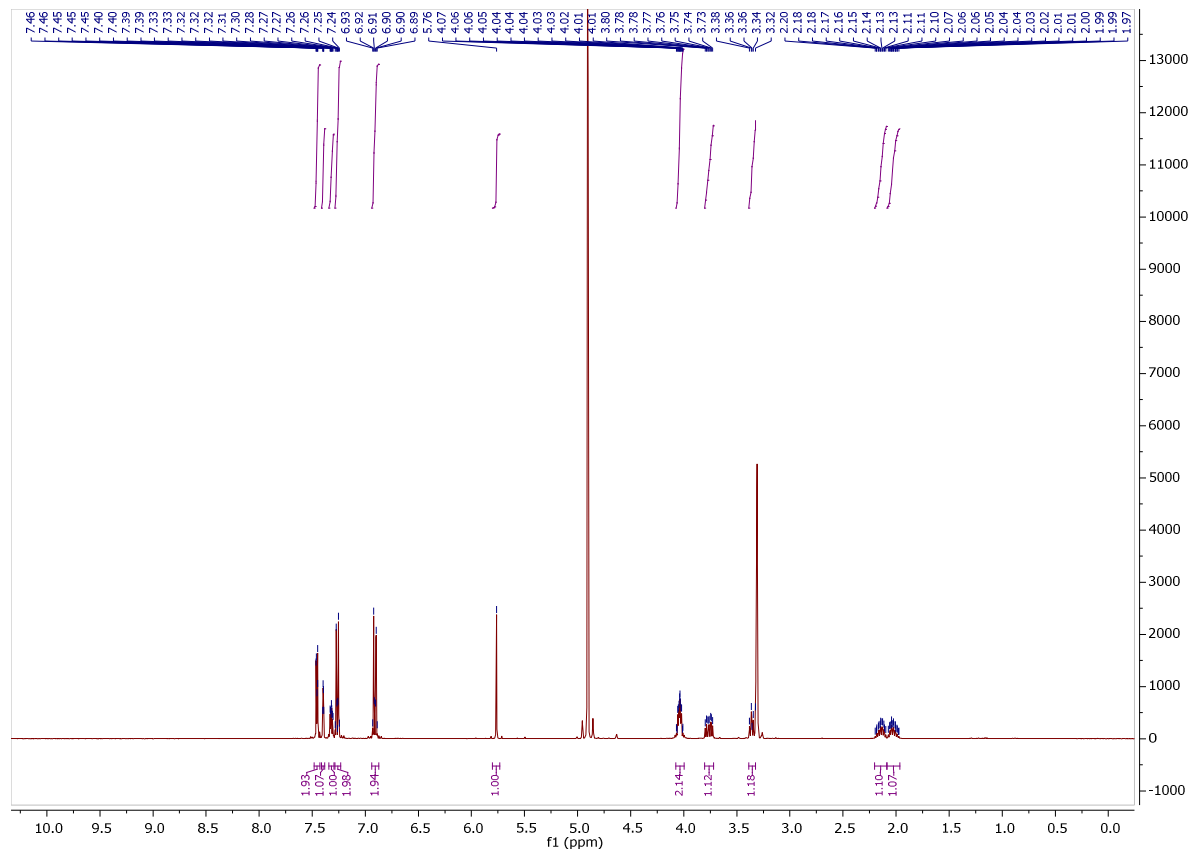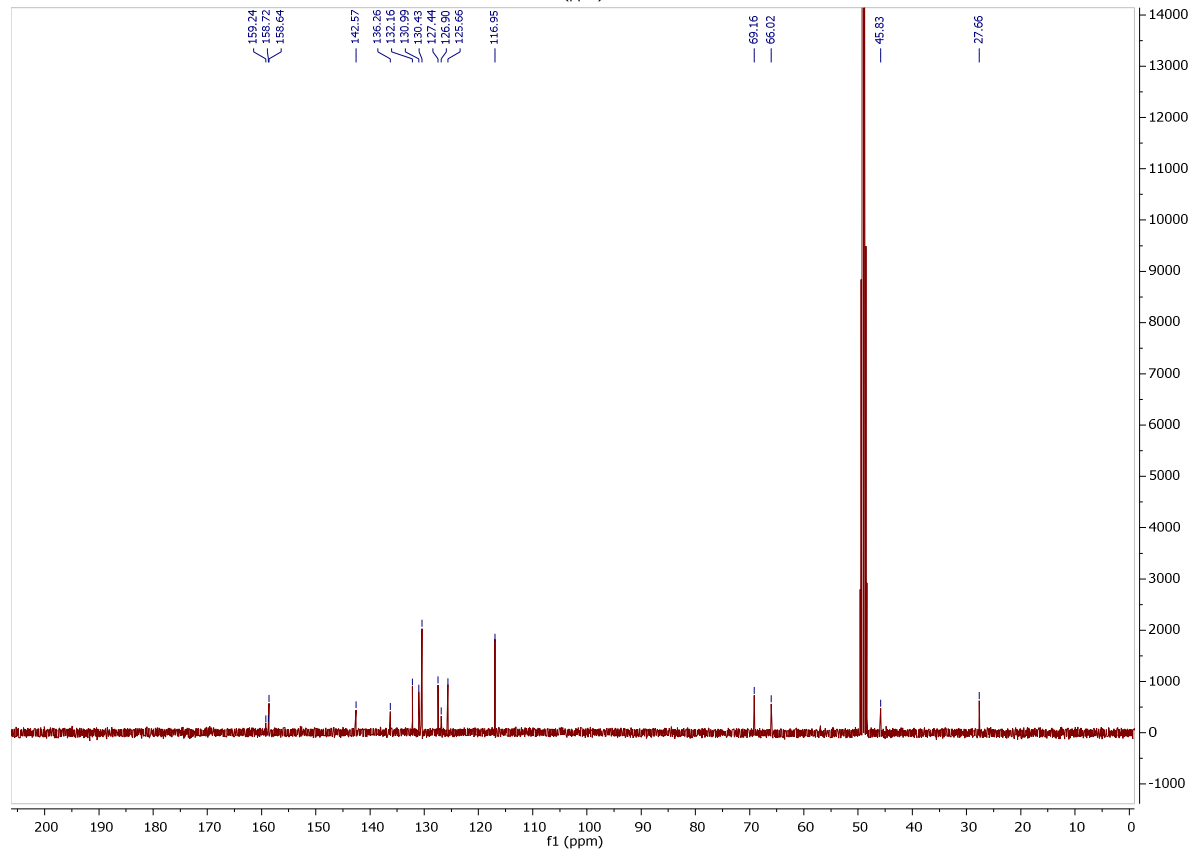

11f

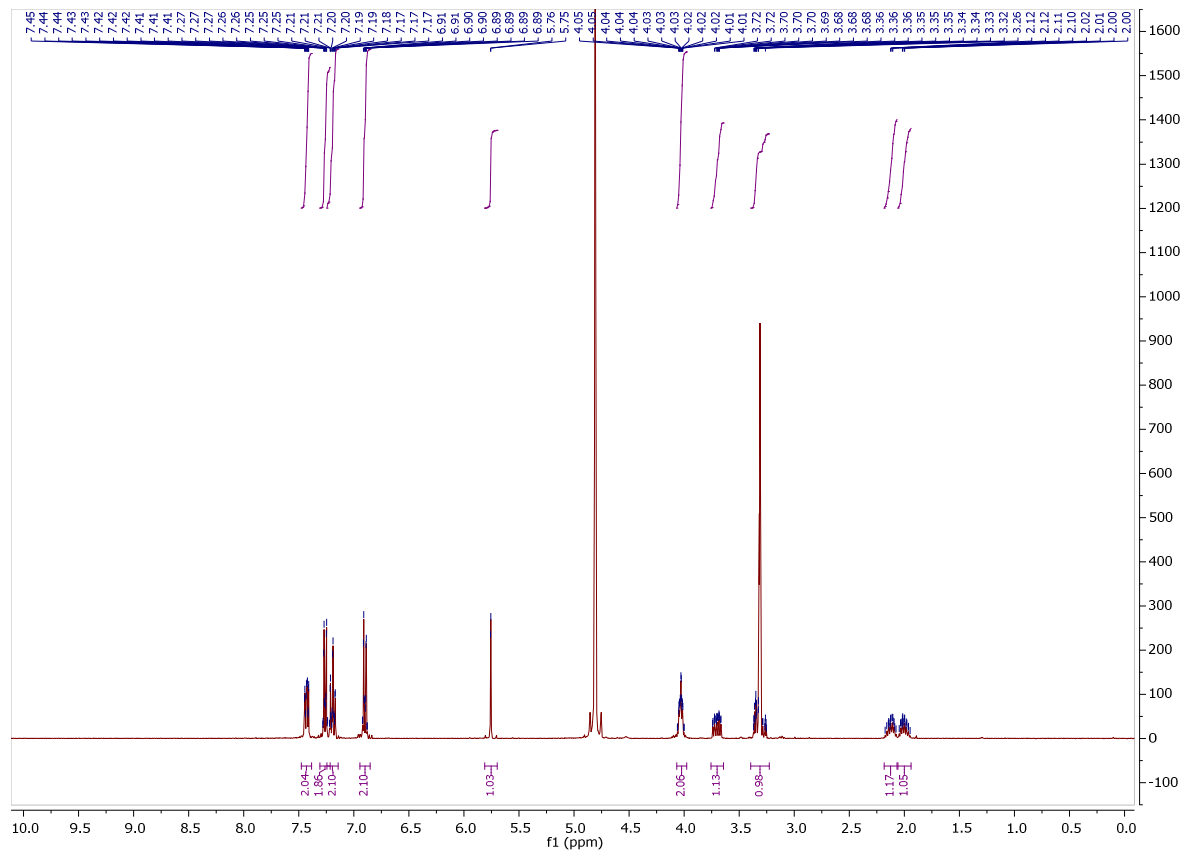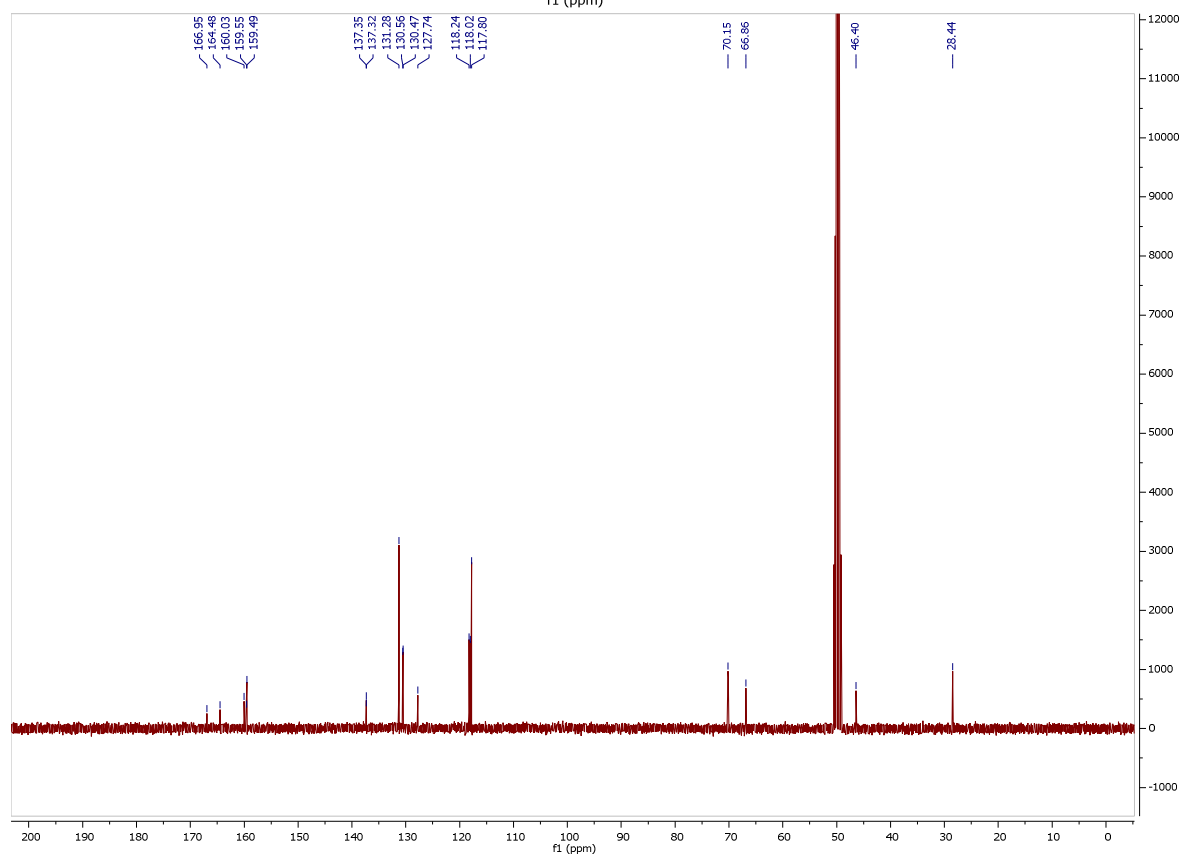

11g

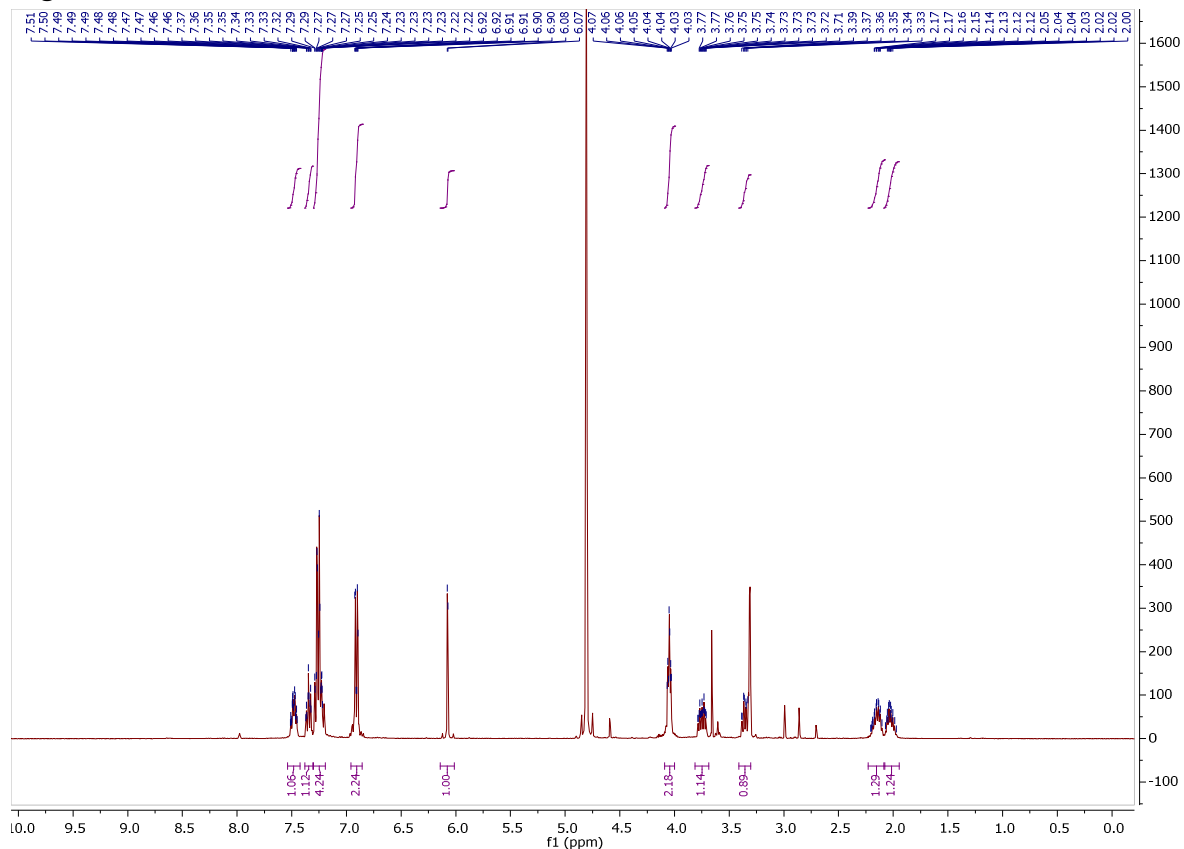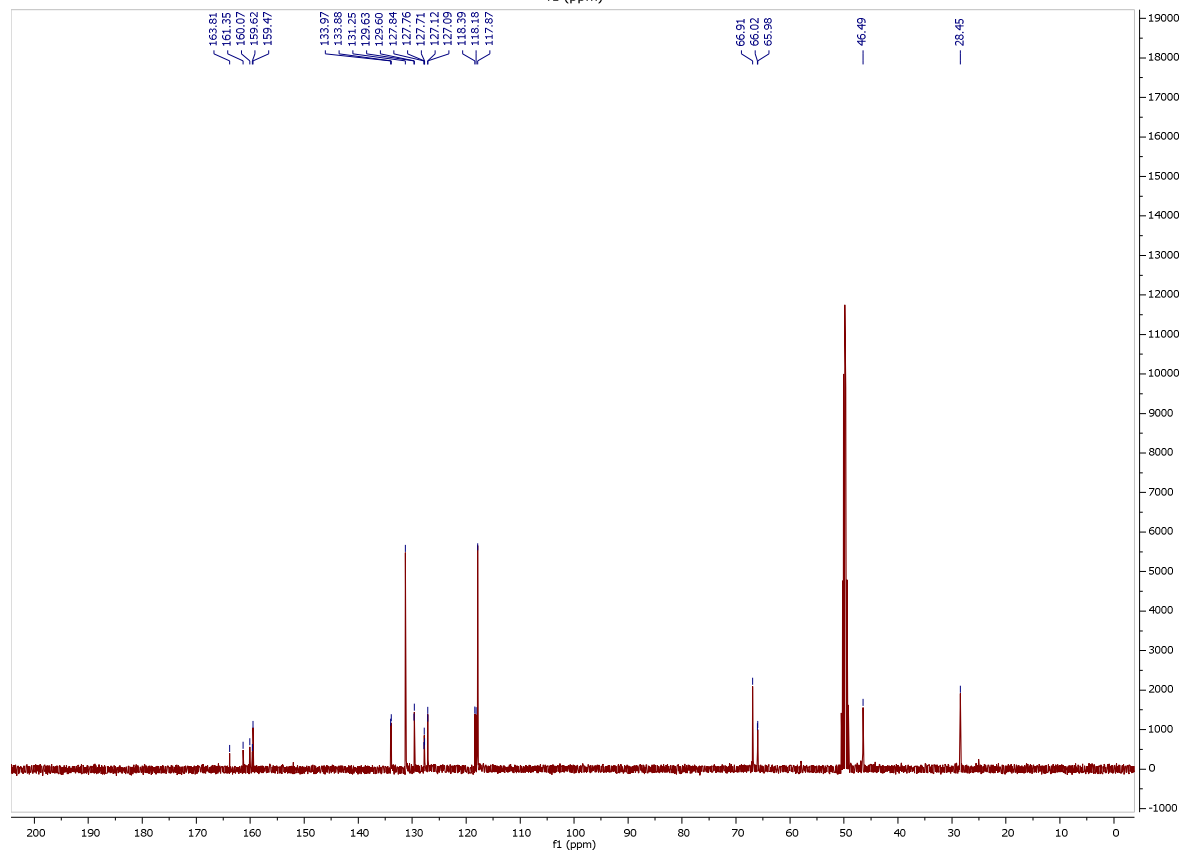

11h

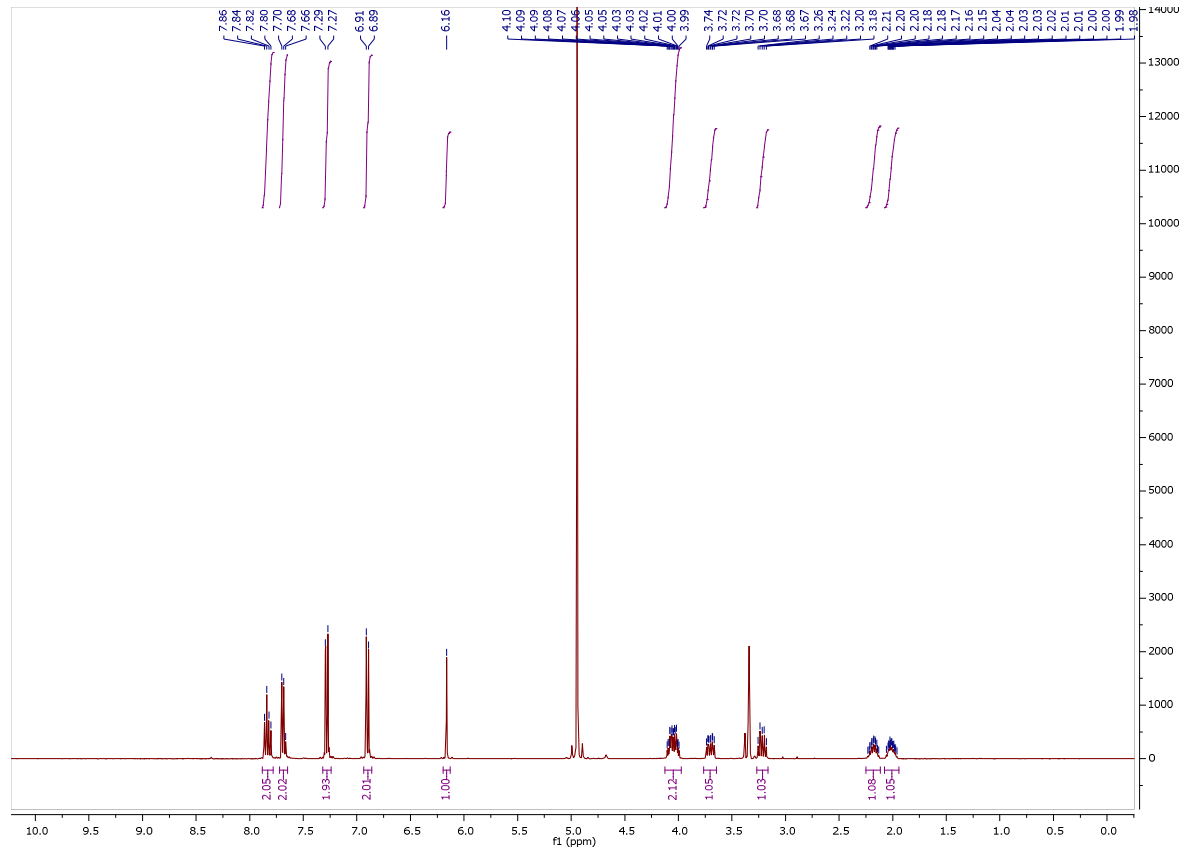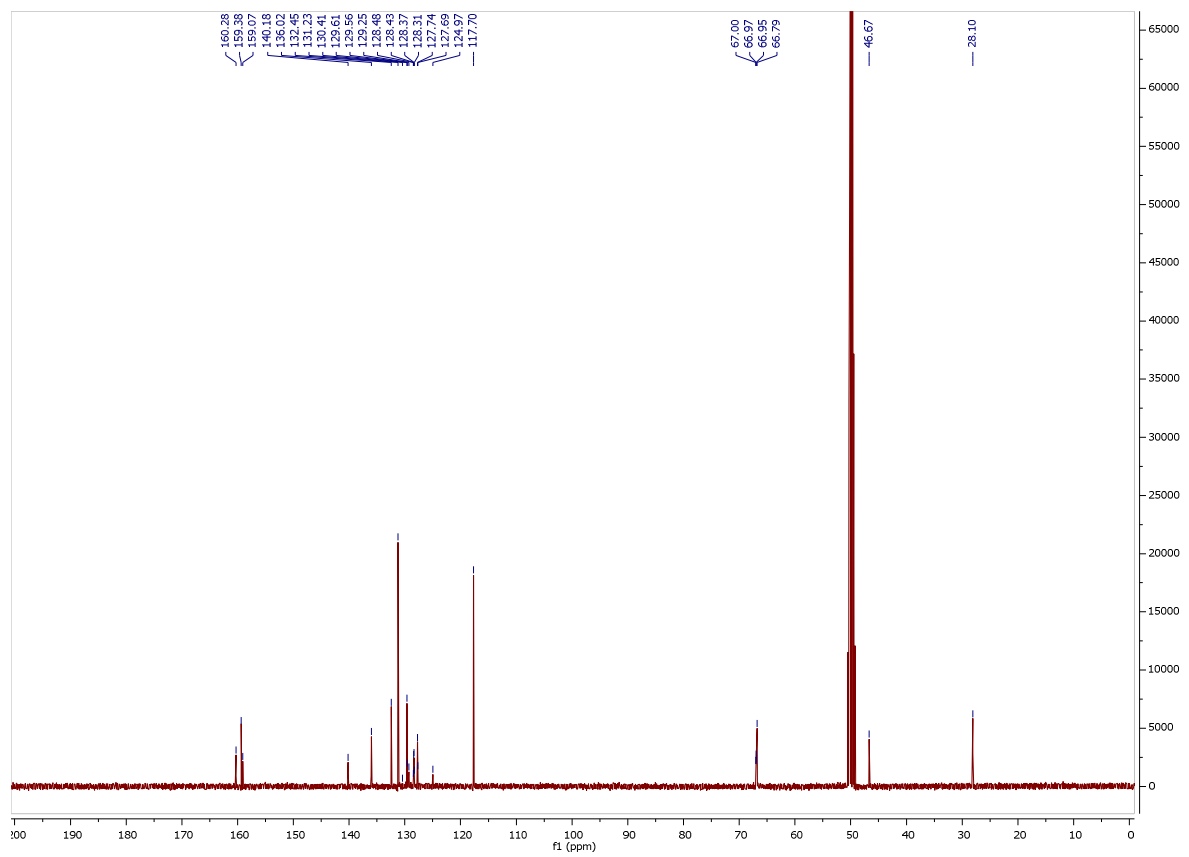



11i

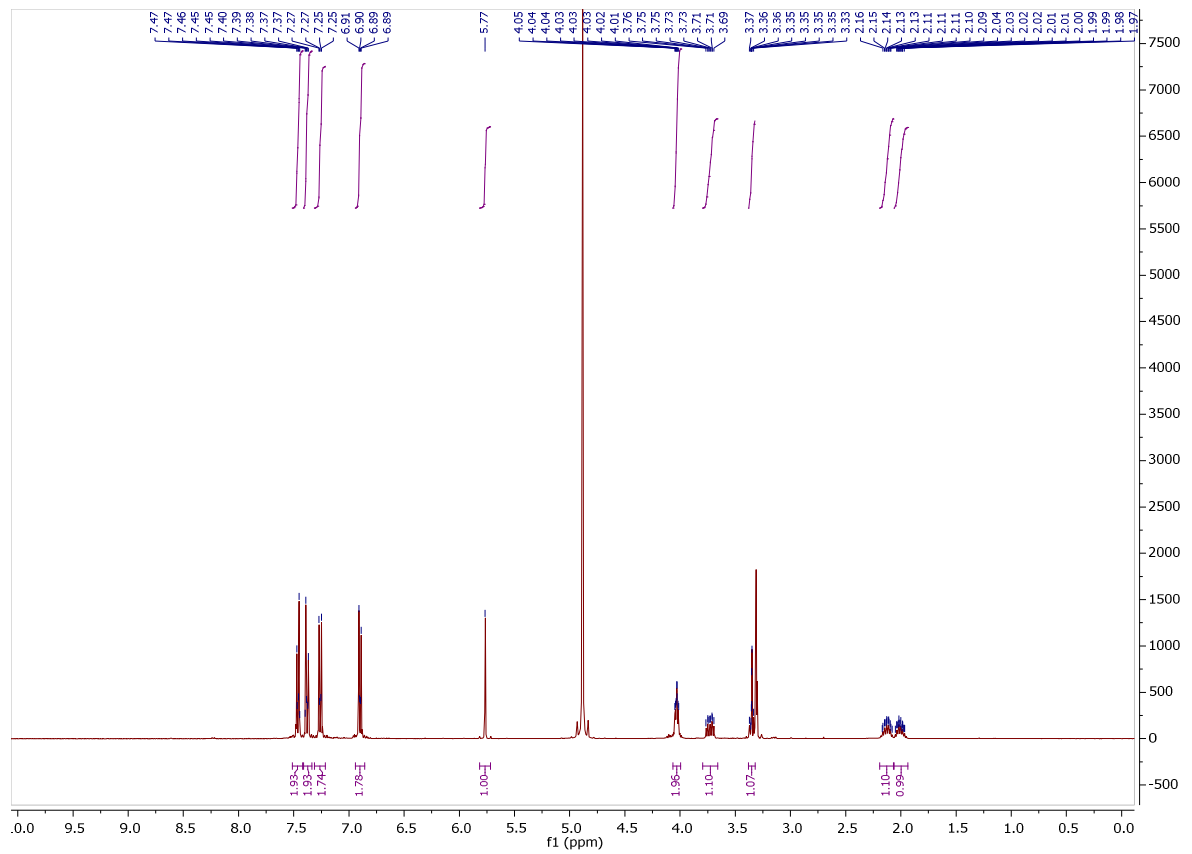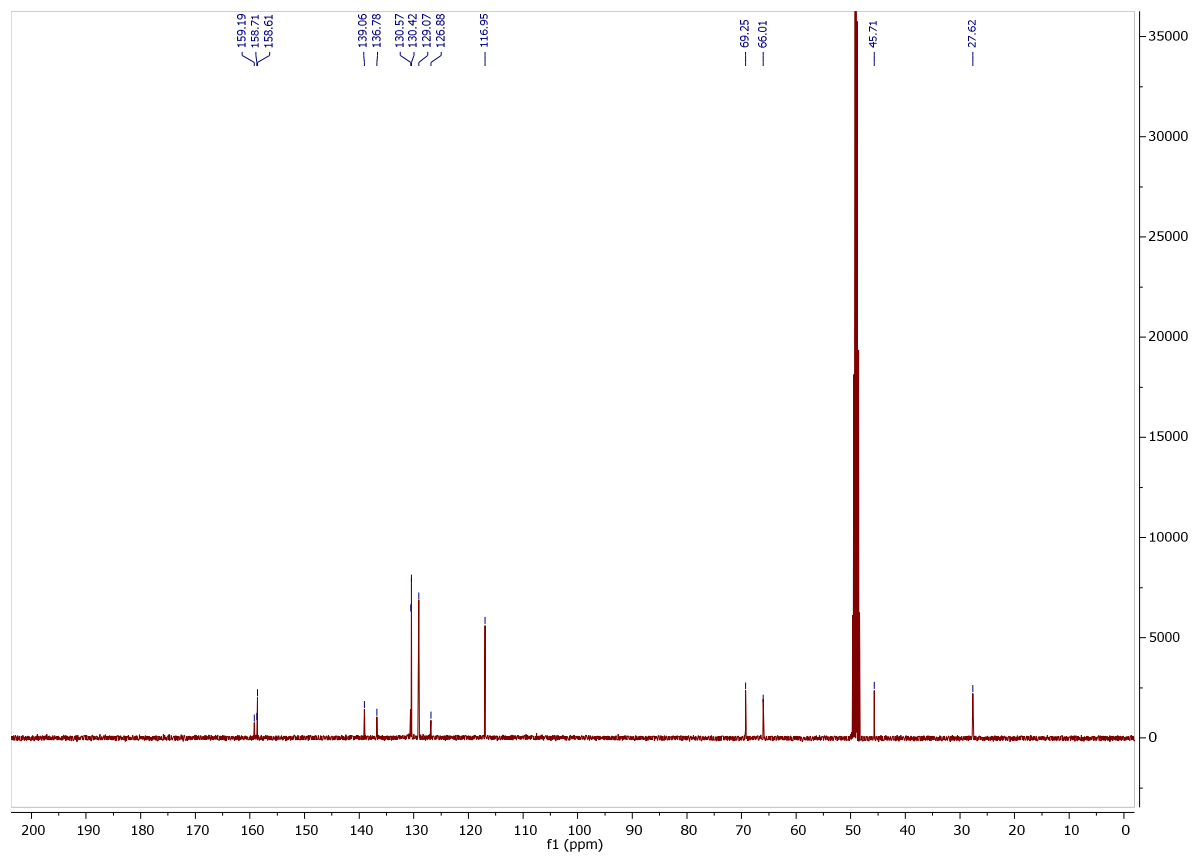

11j

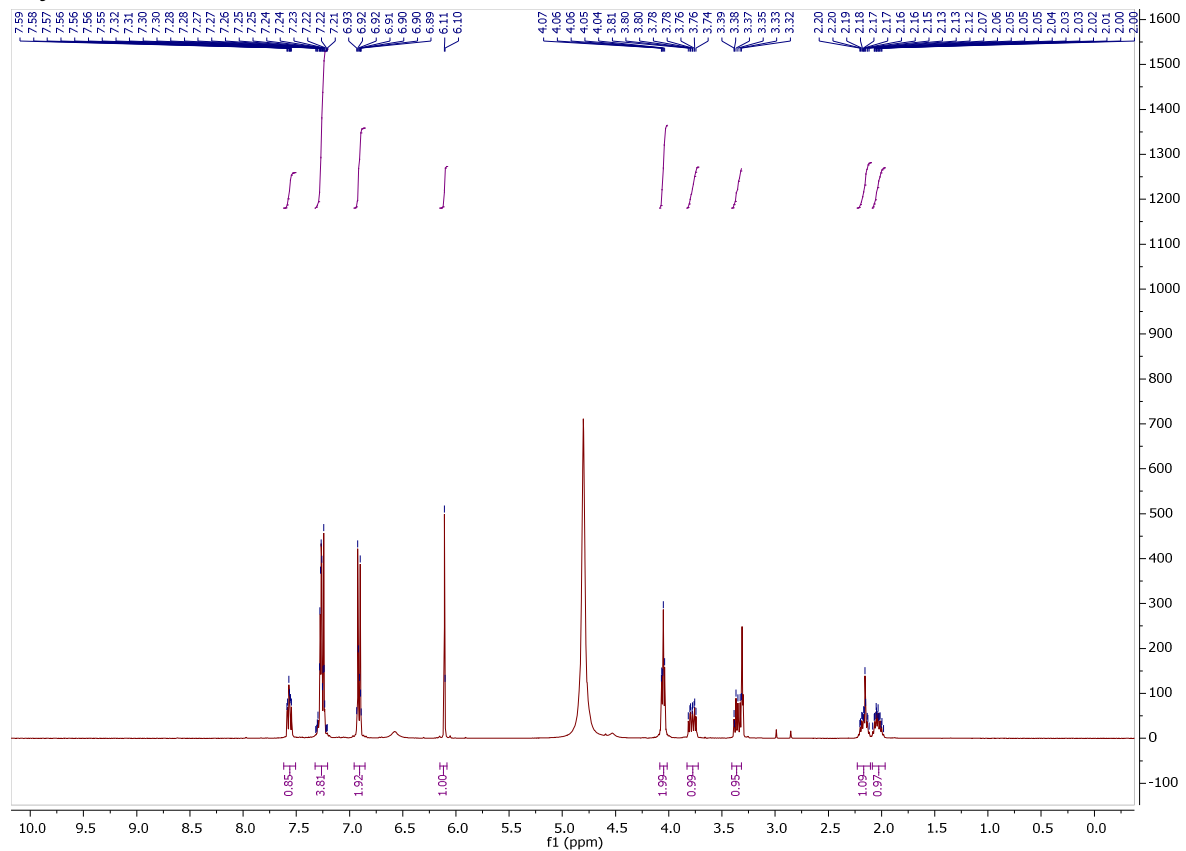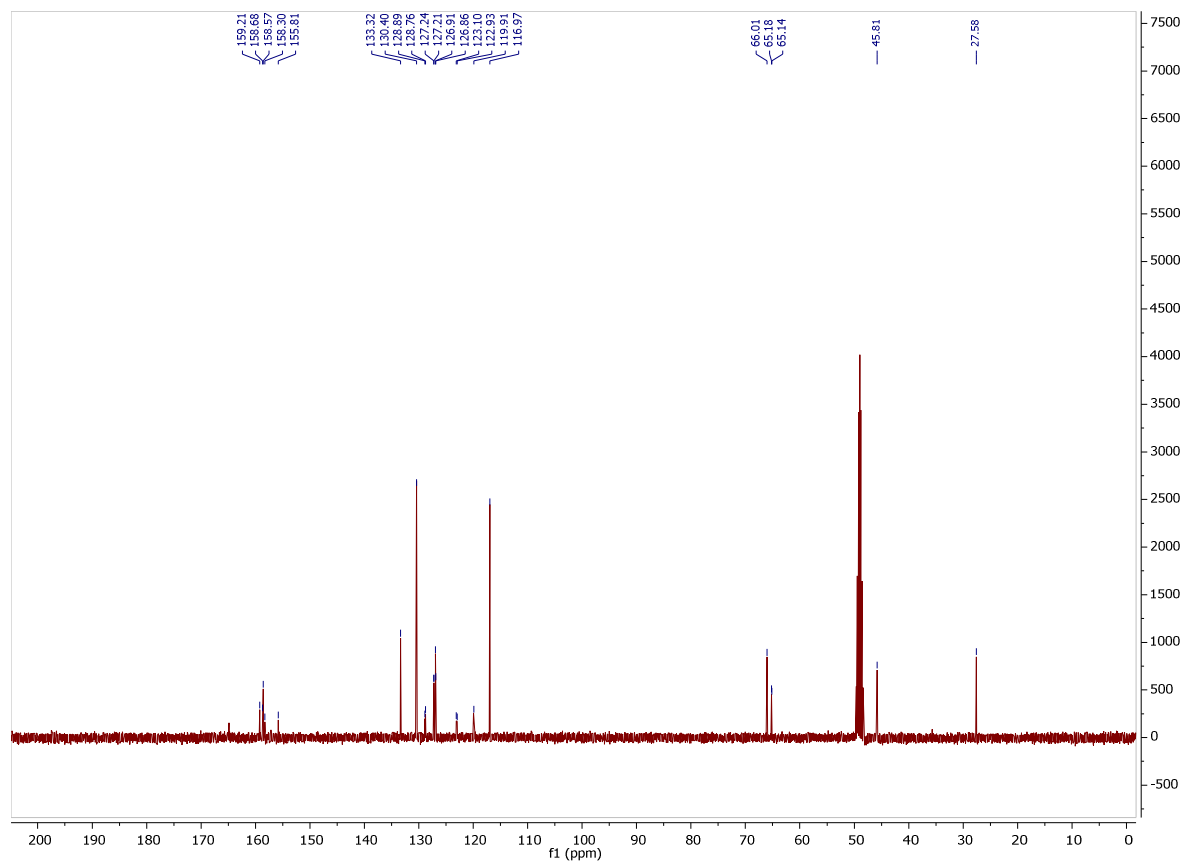

11k

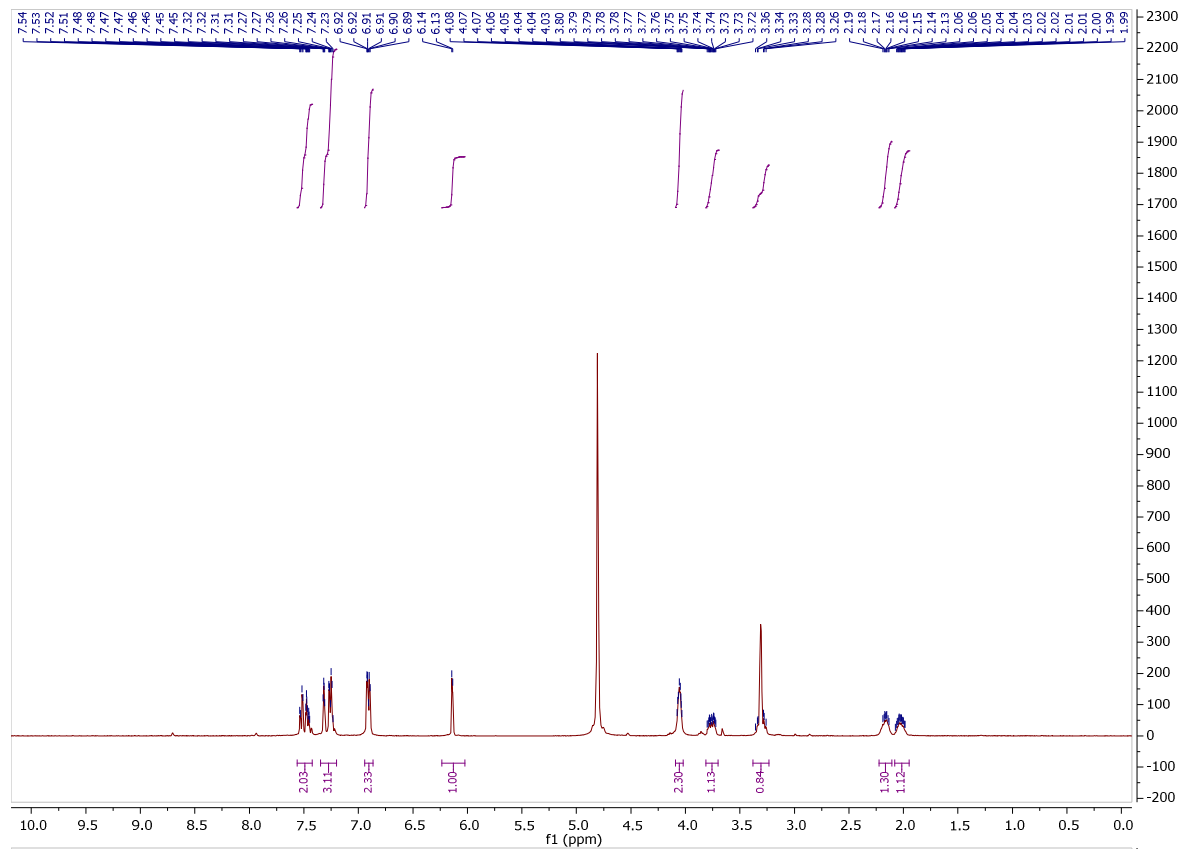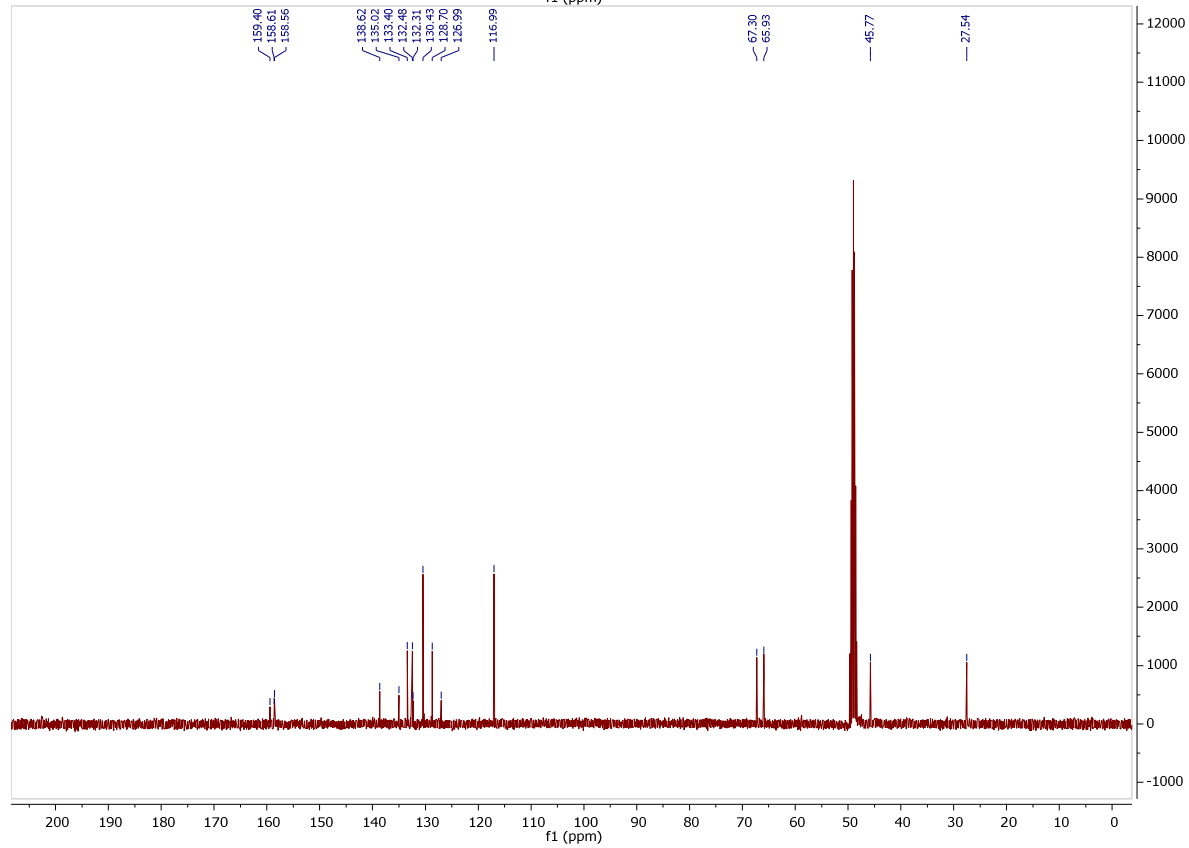

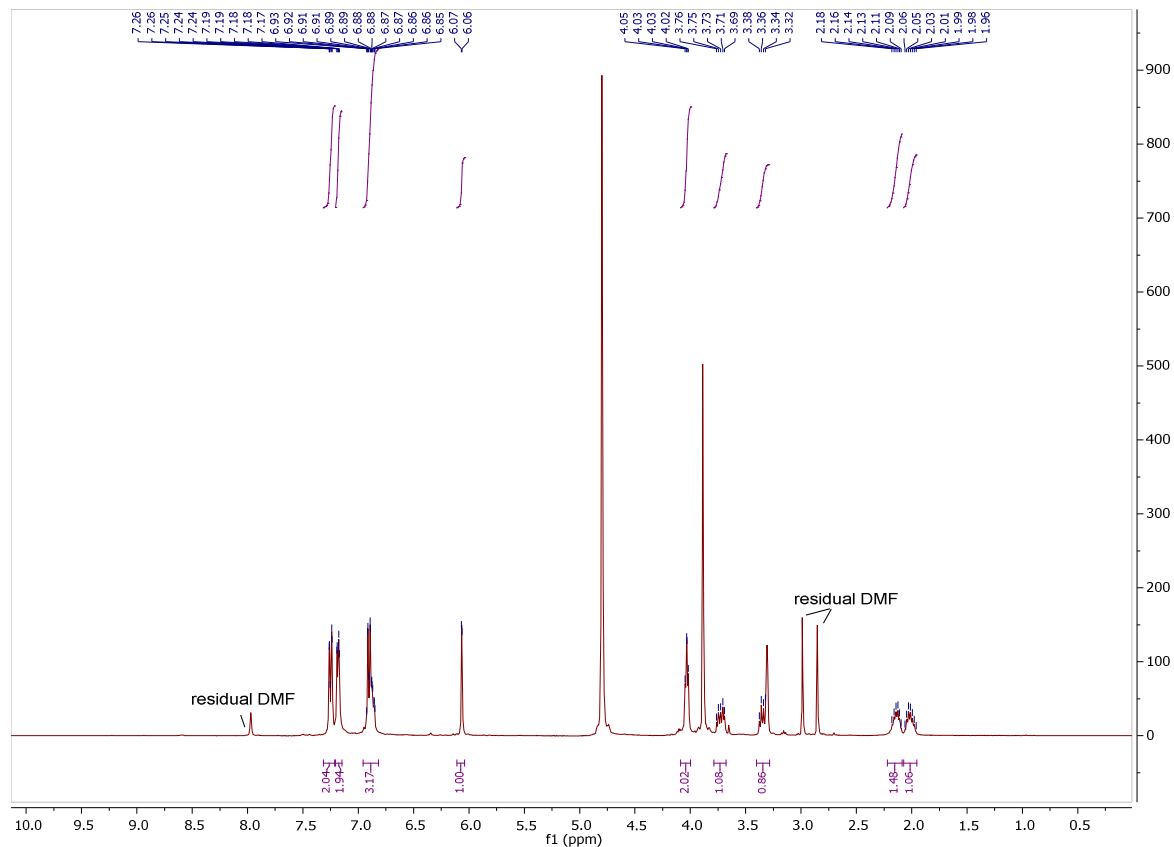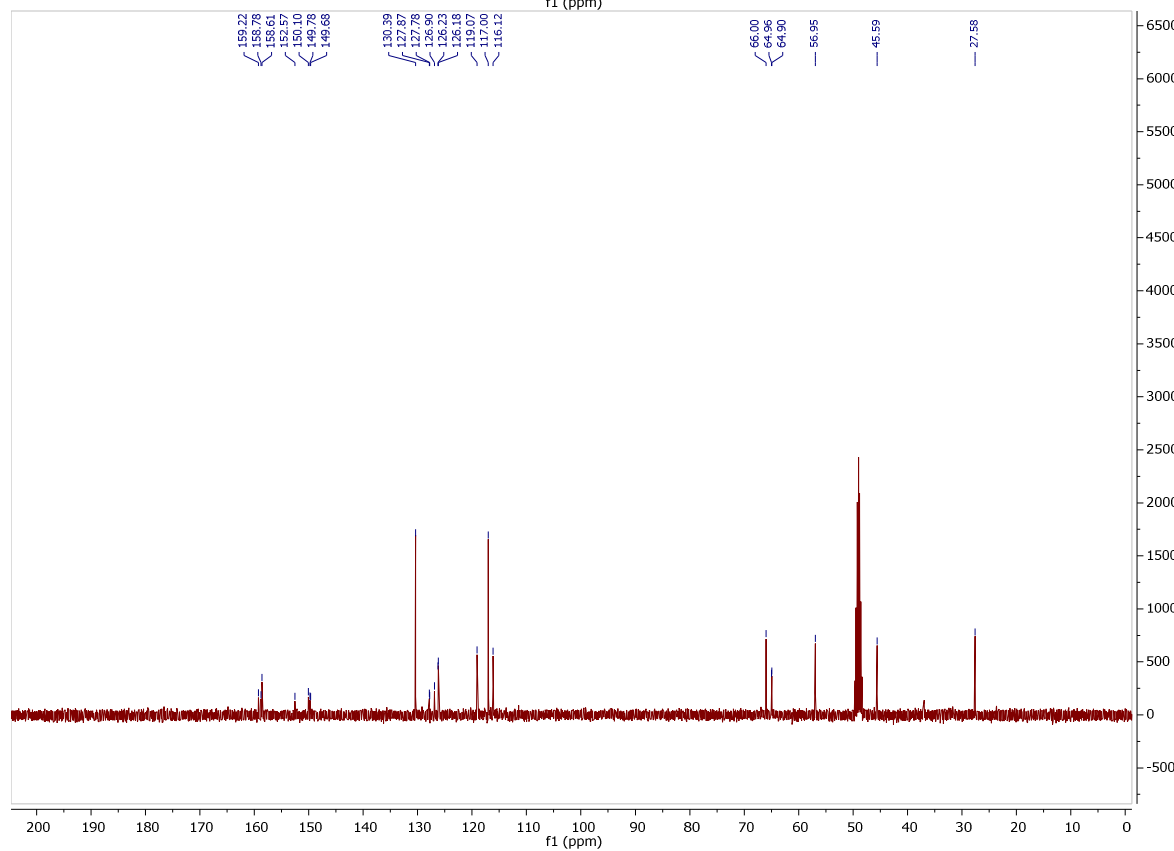



11n

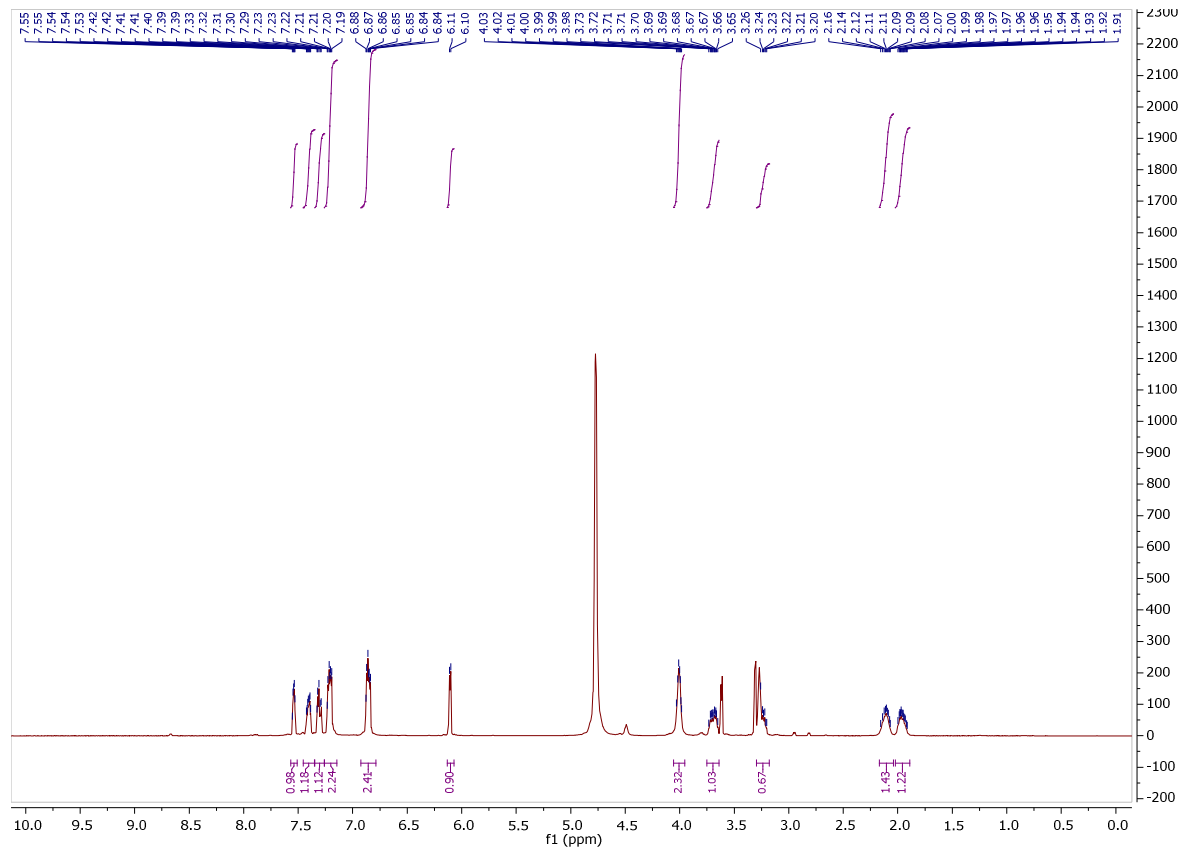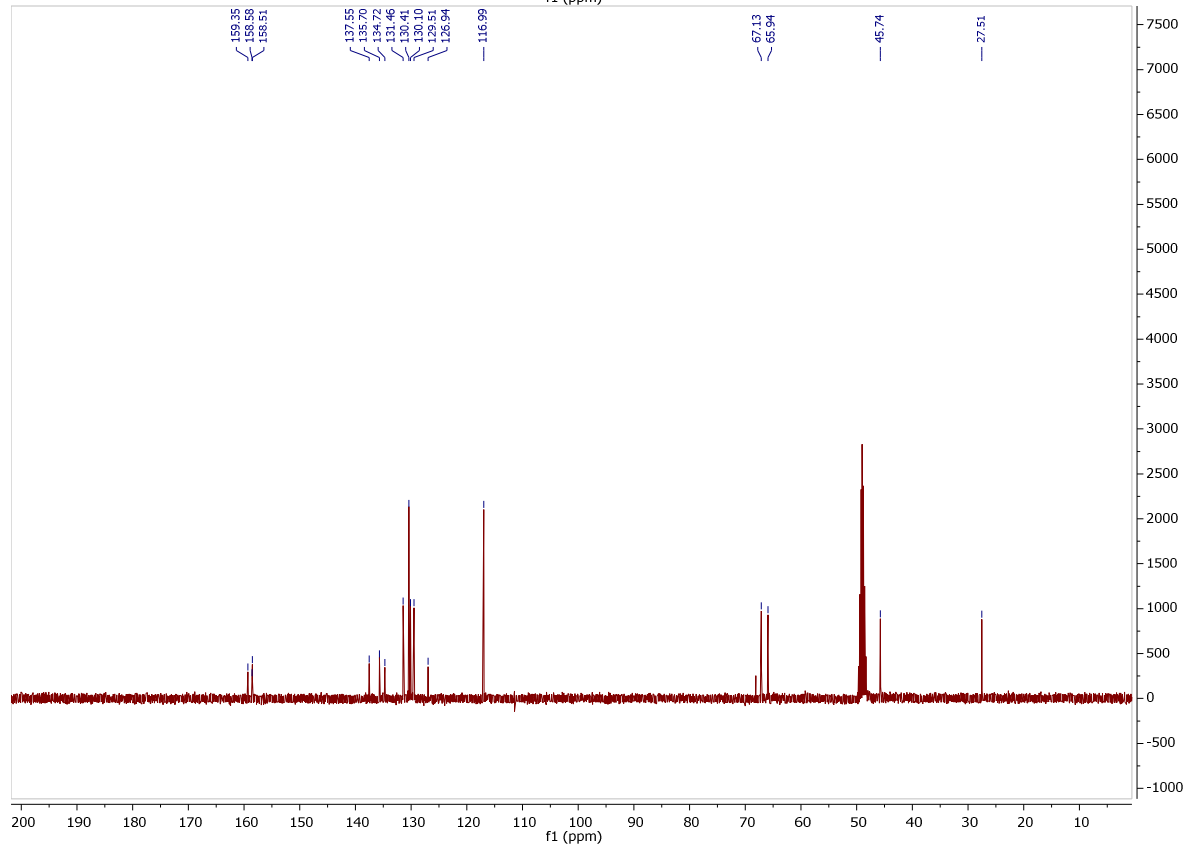

11o

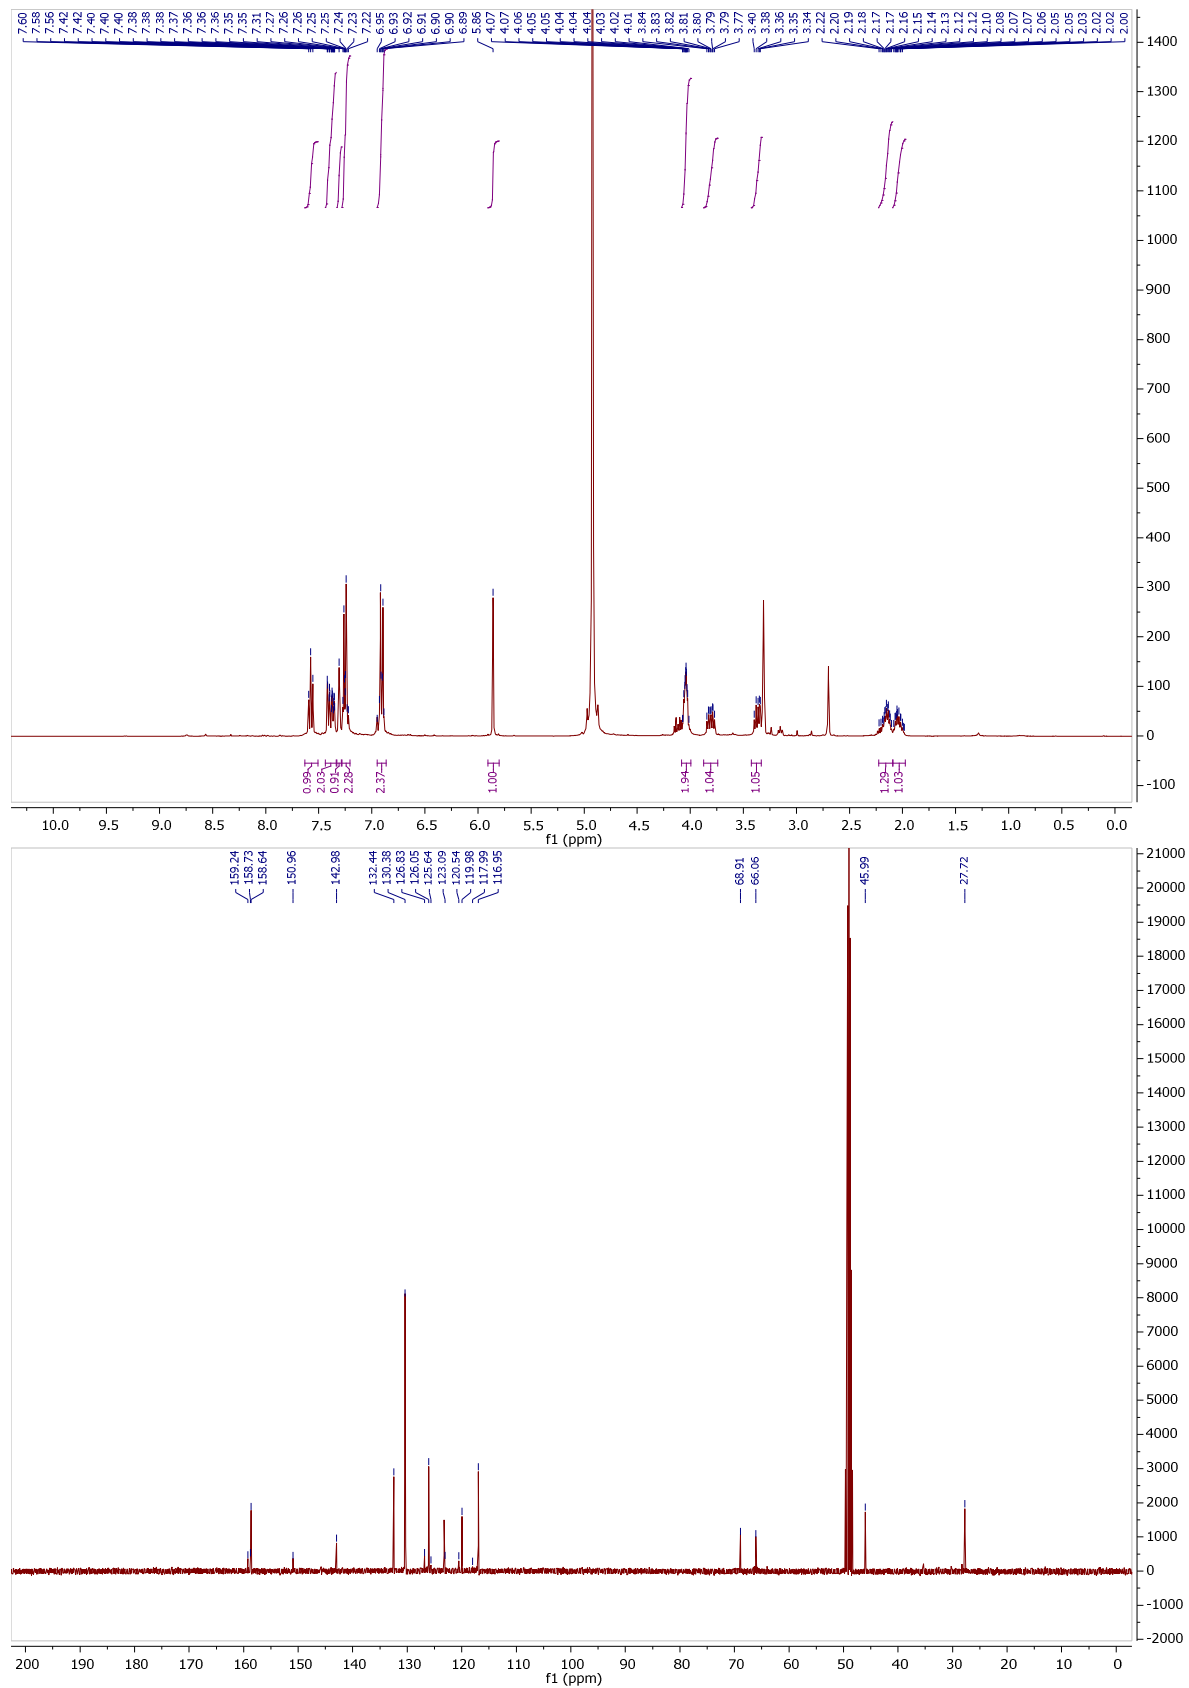

11p

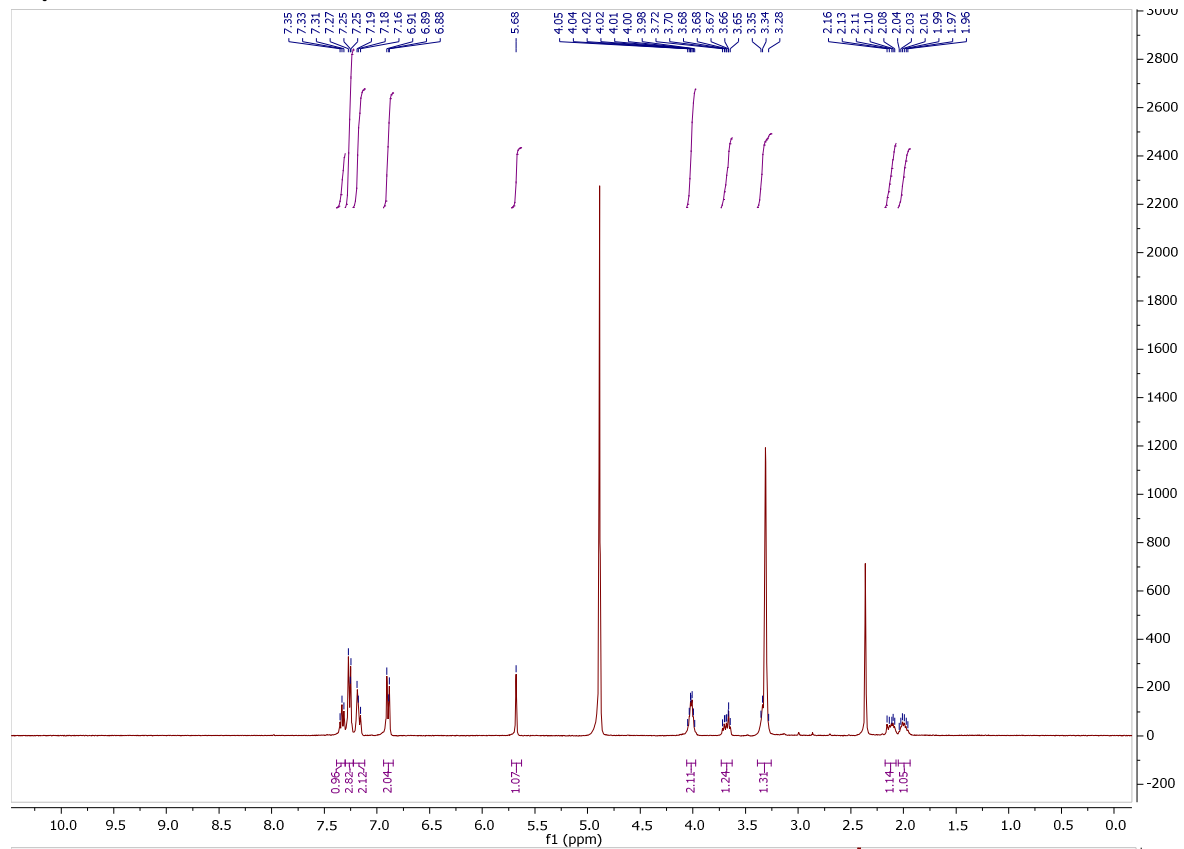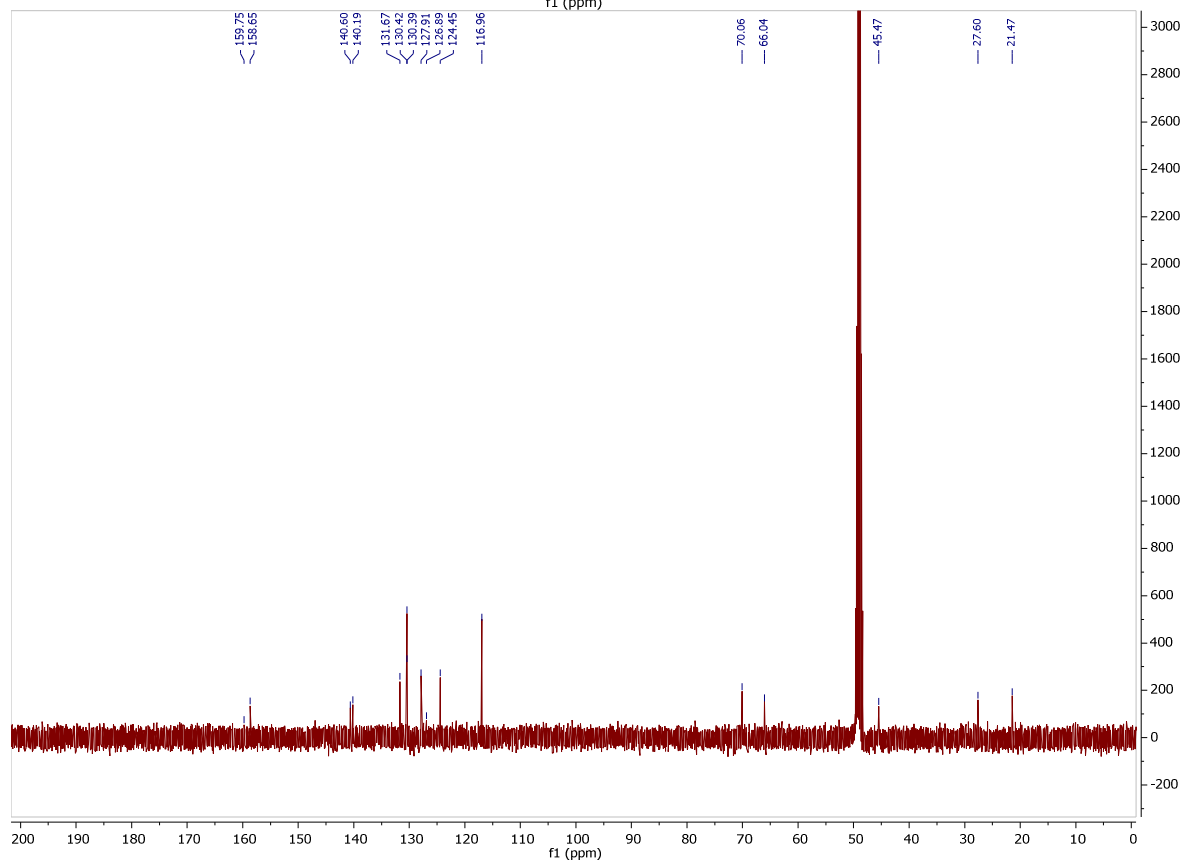



11q

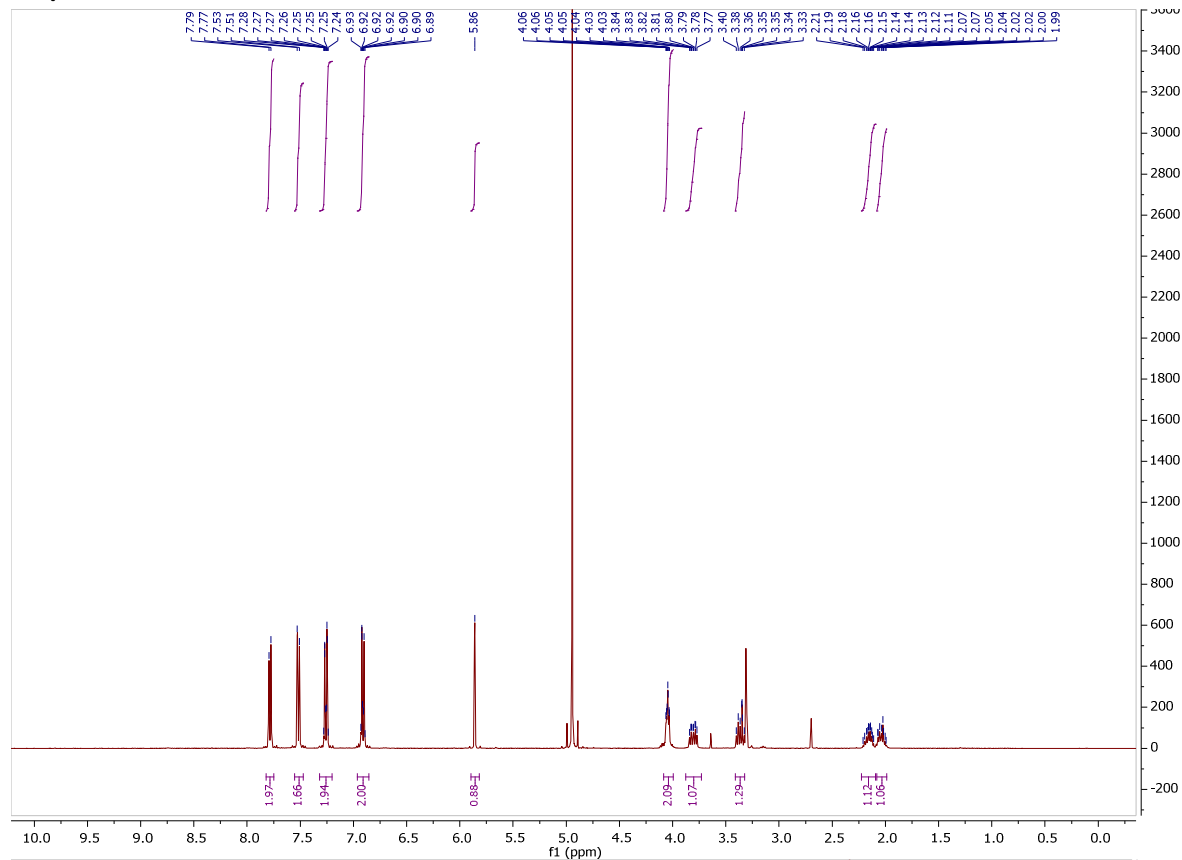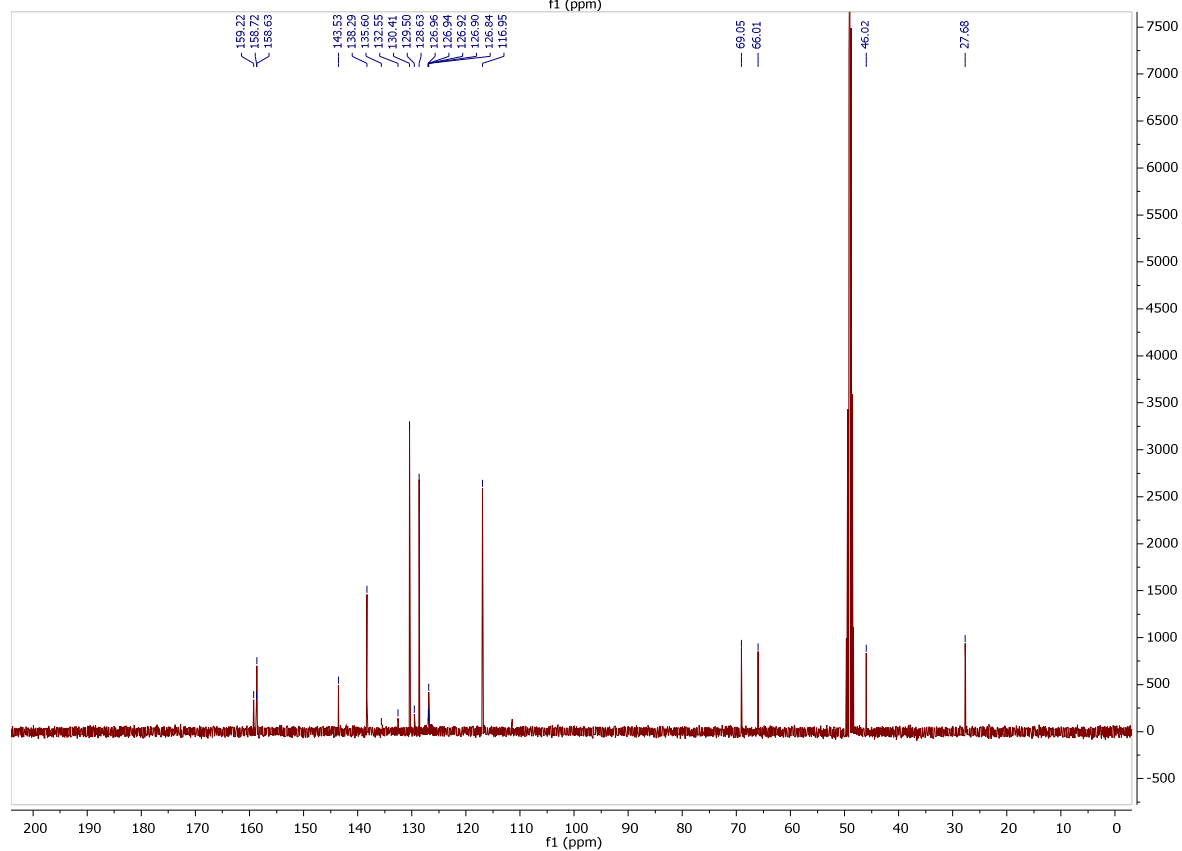

11r

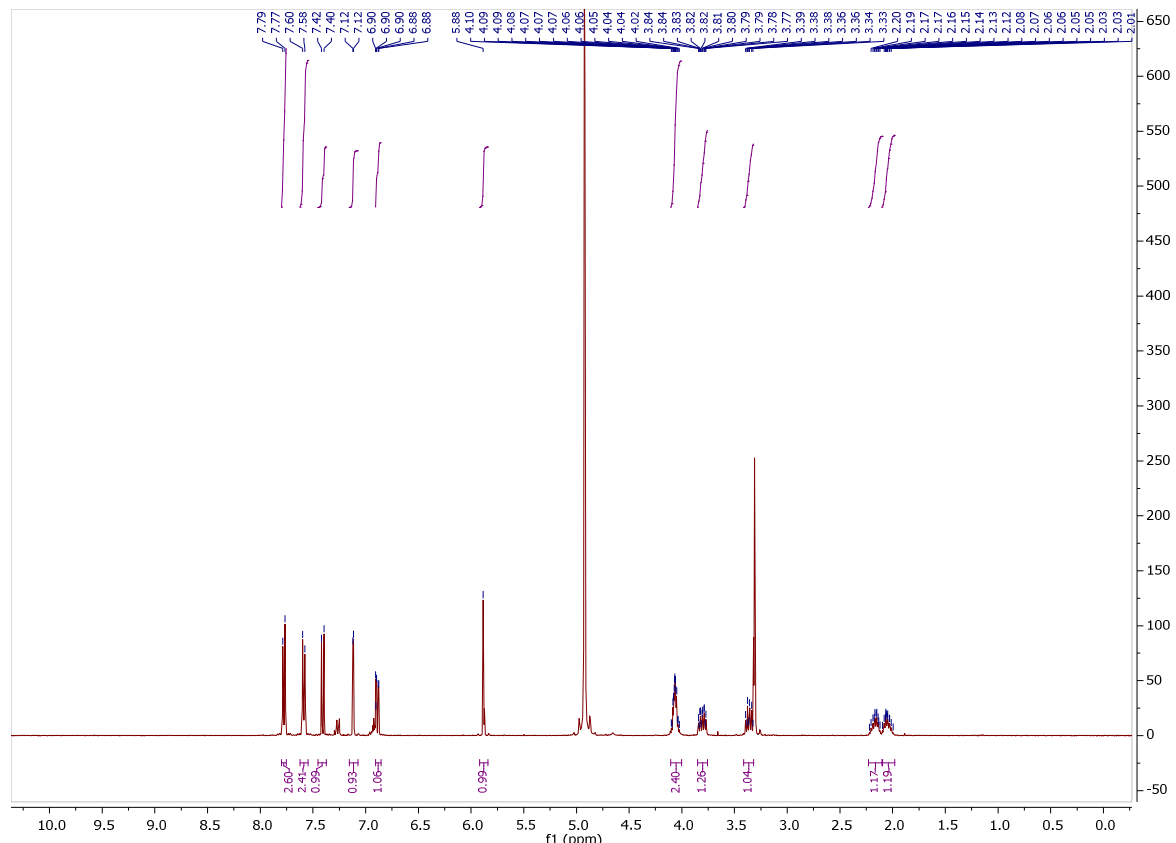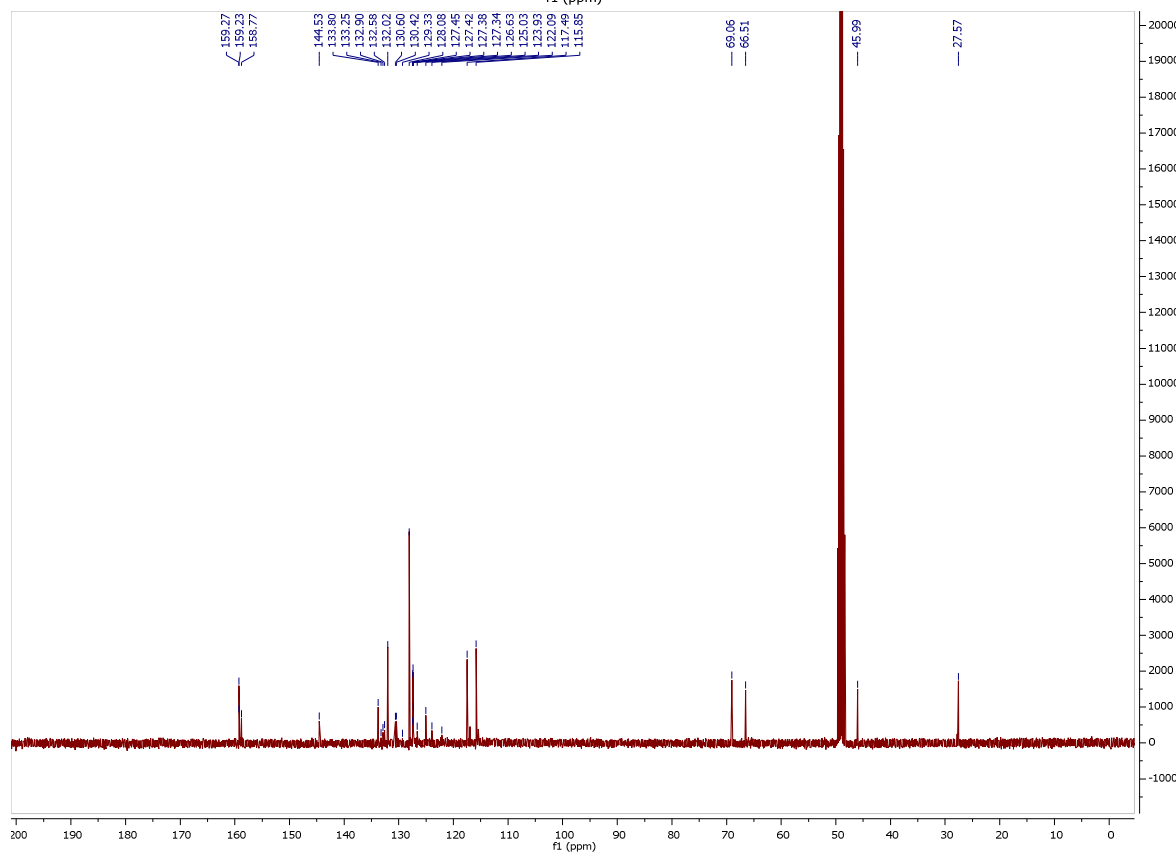

11s

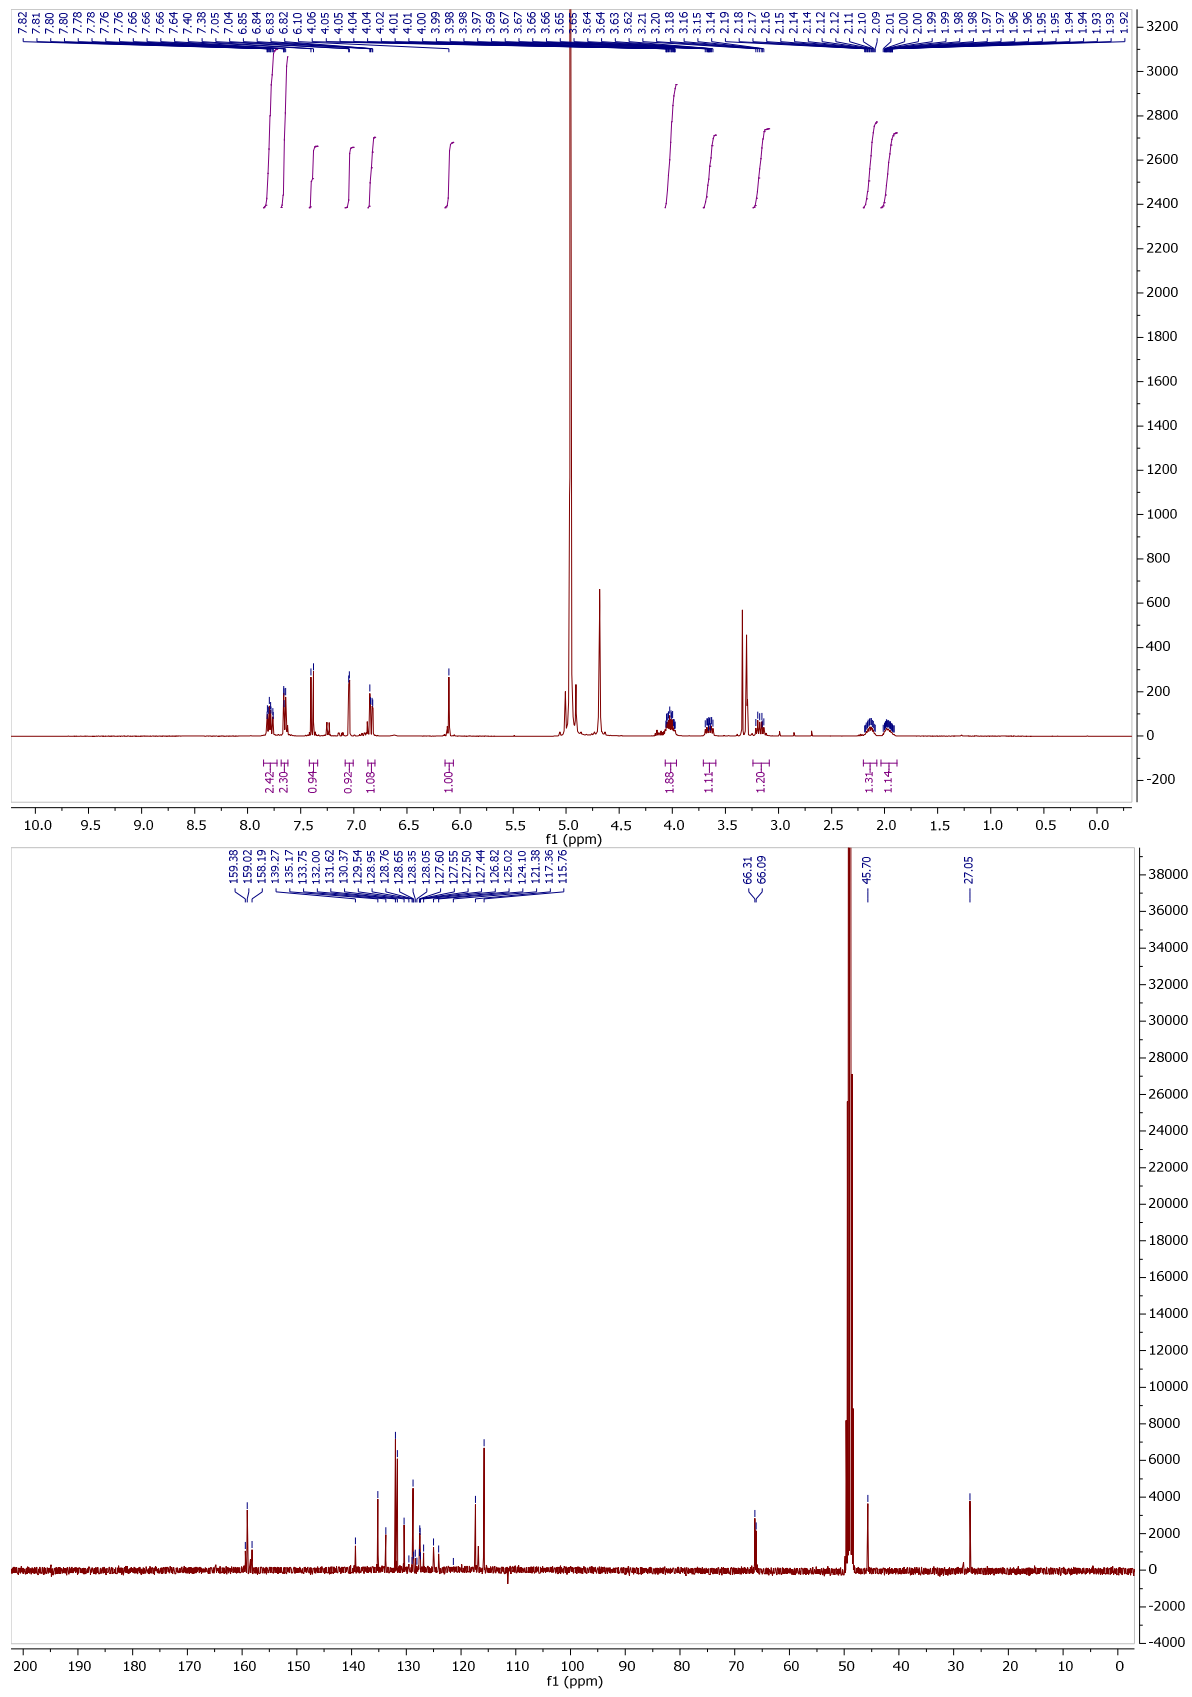

11t

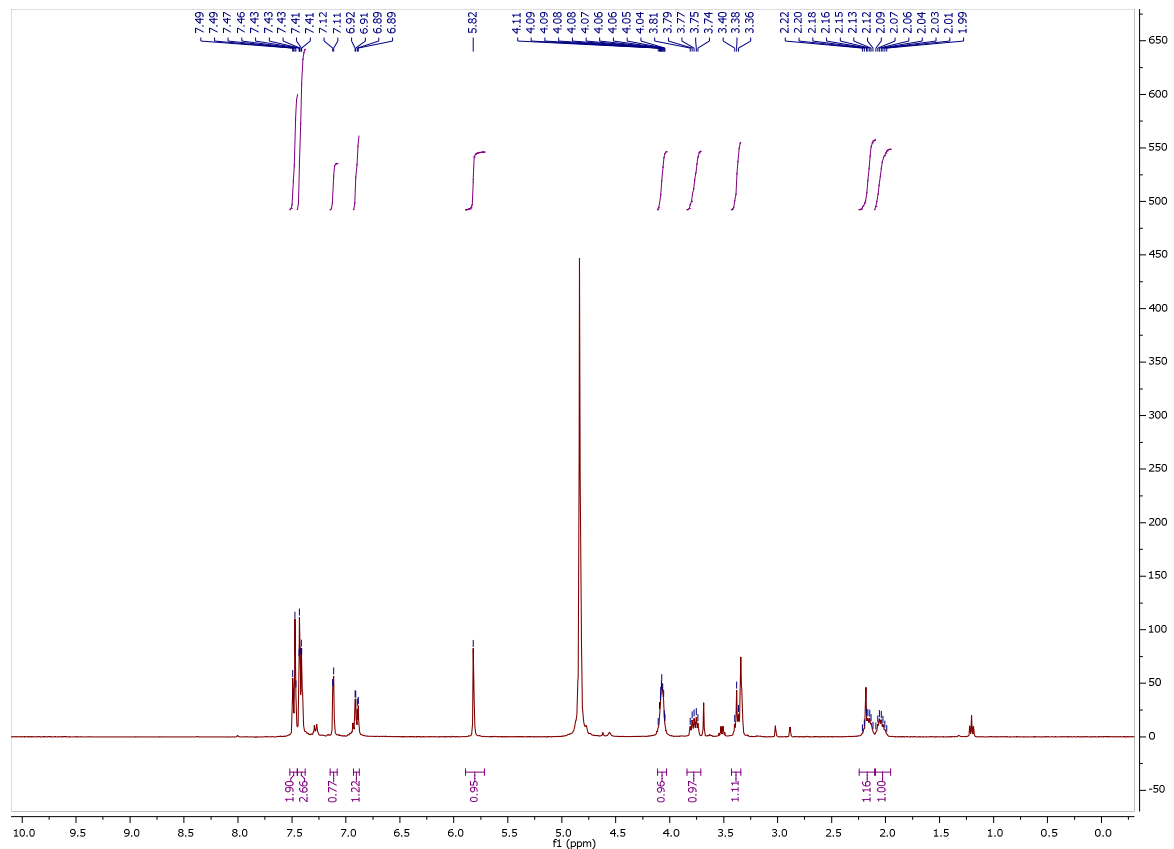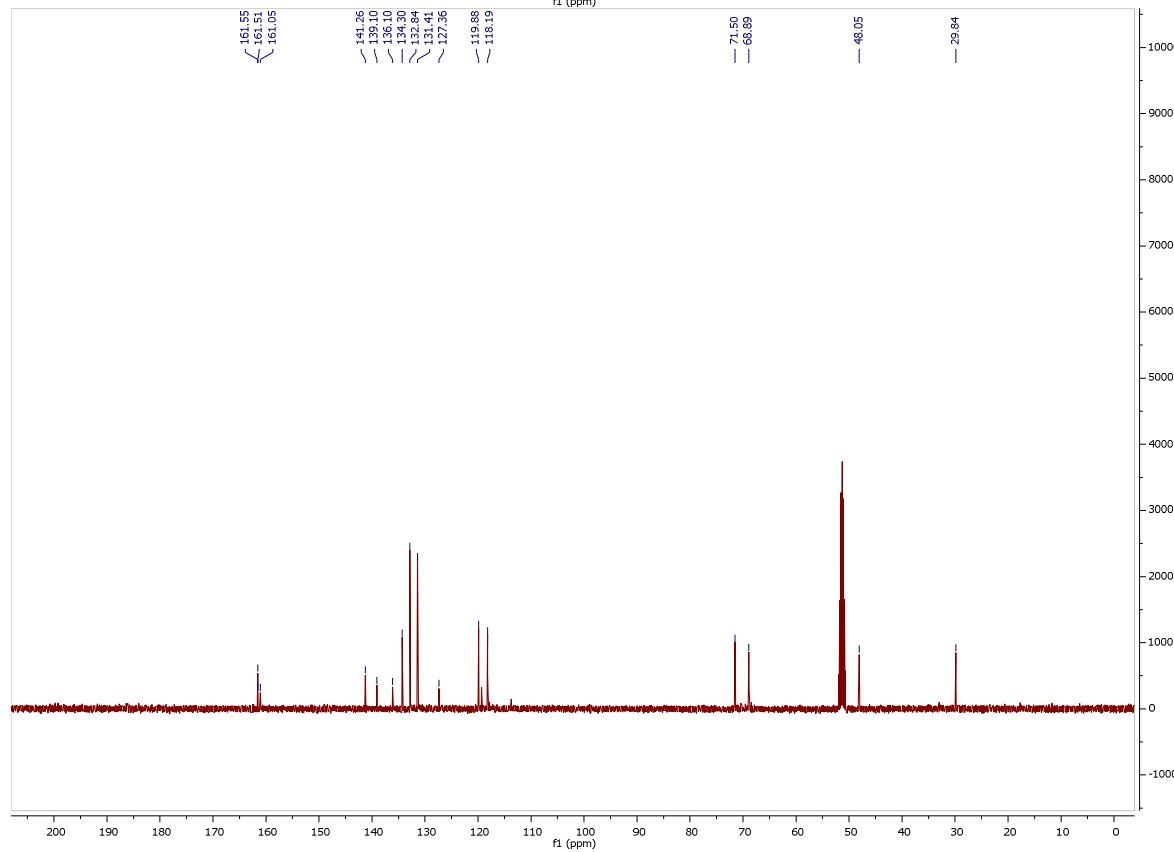

11u

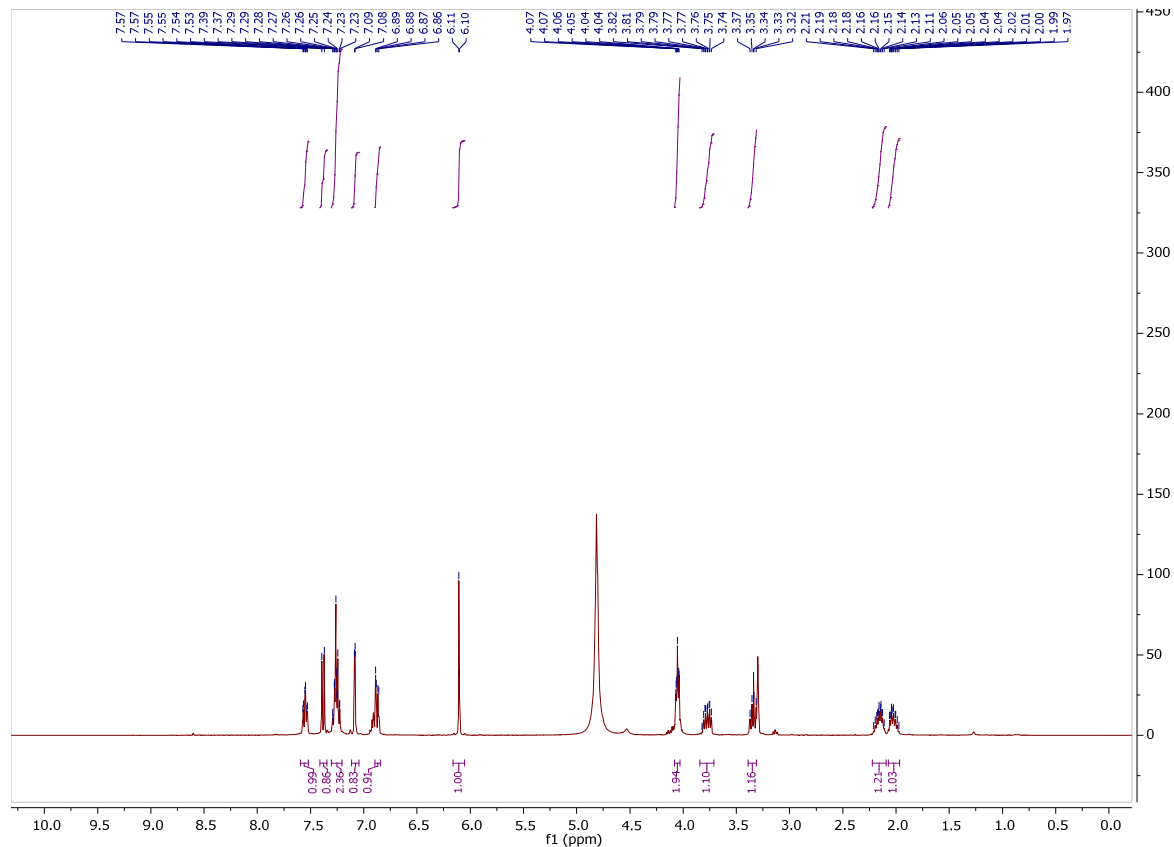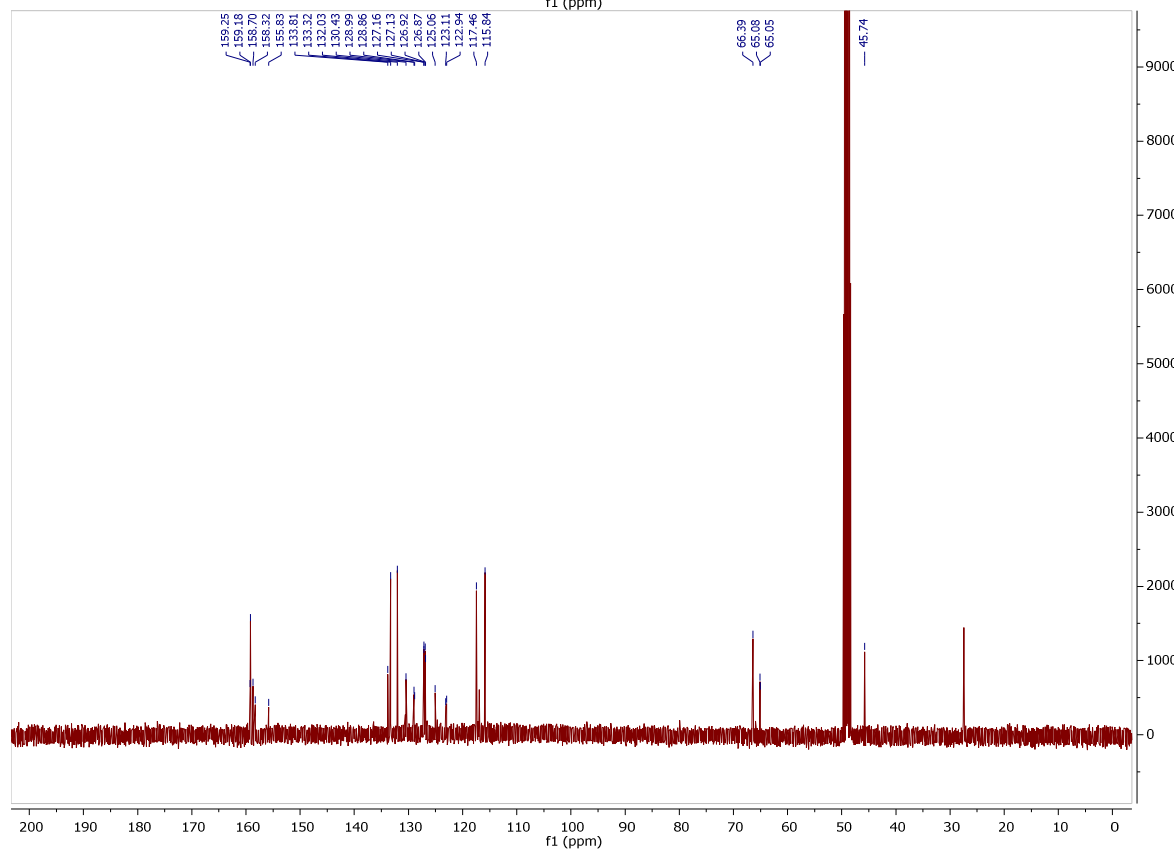

11v

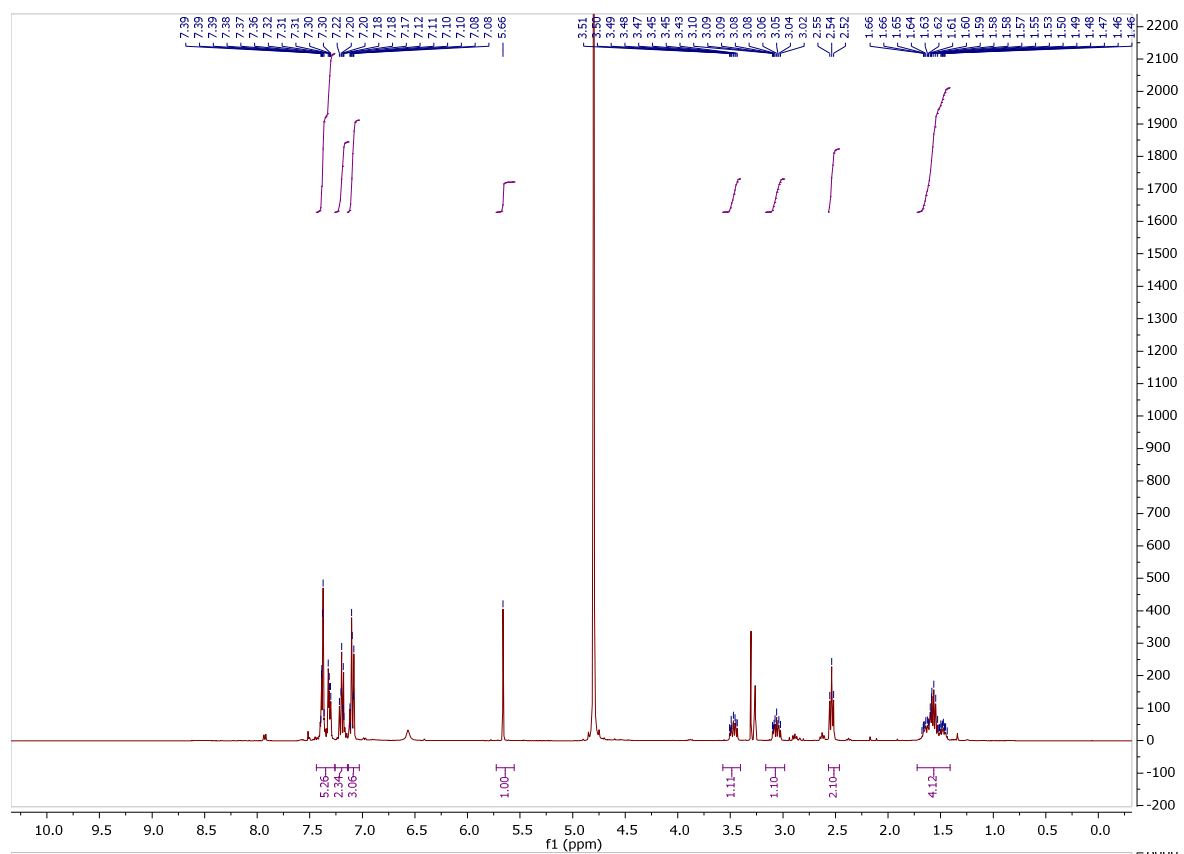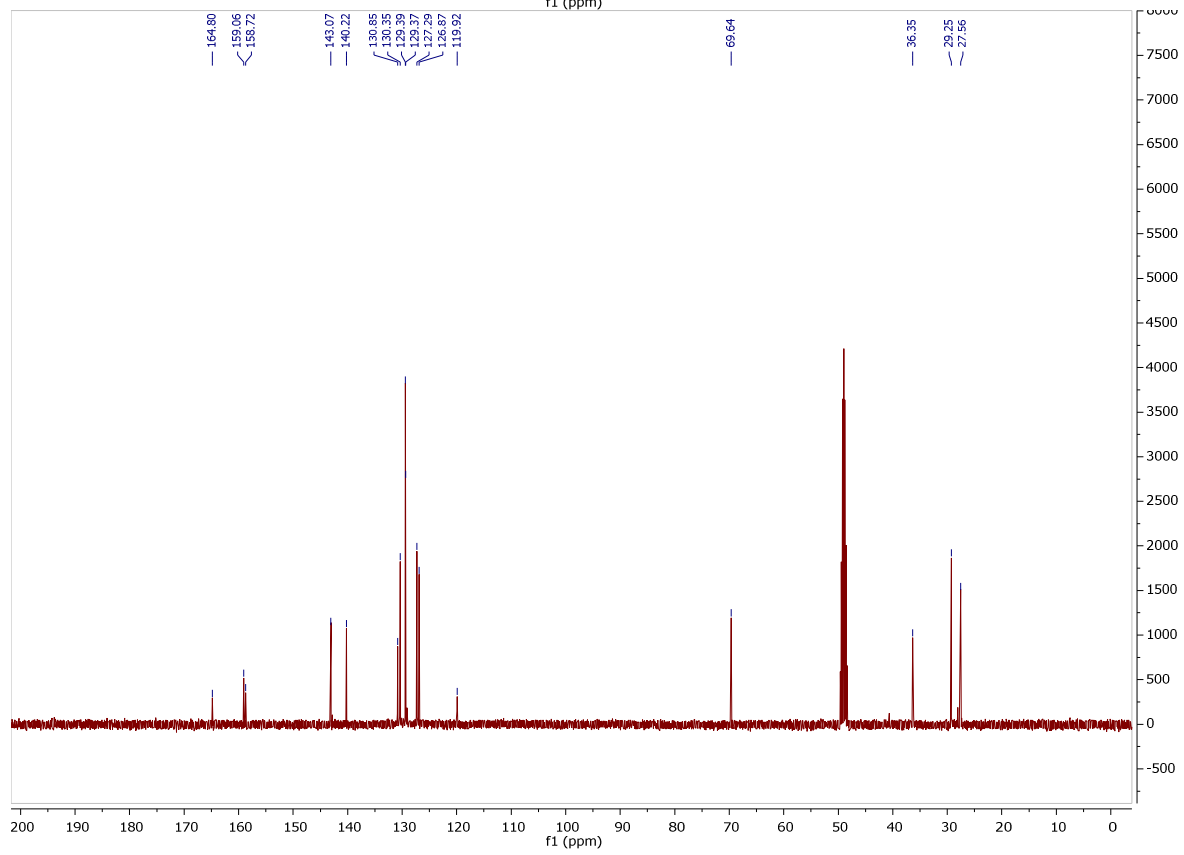

Supplement: c6ob01350c1.pdf [file c6ob01350c1.pdf]
